# Supplementary material
Source: HighWire-hosted journal article supplement (https://erj.ersjournals.com/content/52/5/1800564)
Supplement: inline-supplementary-material-1 [file inline-supplementary-material-1.pdf]

## Supplementary material

### Transcriptome profiling reveals the complexity of pirfenidone effect in human lungs

Grazyna Kwapiszewska<sup>1,2</sup>, Anna Gungl<sup>2</sup>, Jochen Wilhelm<sup>3†</sup>, Leigh M. Marsh<sup>1</sup>, Helene Thekkekara Puthenparampil<sup>1</sup>, Katharina Sinn<sup>4</sup>, Miroslava Didiasova<sup>5</sup>, Walter Klepetko<sup>4</sup>, Djuro Kosanovic<sup>3</sup>, Ralph T. Schermuly<sup>3†</sup>, Lukasz Wujak<sup>5</sup>, Benjamin Weiss<sup>6</sup>, Liliana Schaefer<sup>7</sup>, Marc Schneider<sup>8†</sup>, Michael Kreuter<sup>8†</sup>, Andrea Olschewski<sup>1</sup>, Werner Seeger<sup>3†</sup>, Horst Olschewski<sup>1,9</sup>, Malgorzata Wygrecka<sup>5†</sup>

<sup>1</sup>Ludwig Boltzmann Institute for Lung Vascular Research, Graz, Austria

<sup>2</sup>Otto Loewi Research Center, Medical University of Graz, Graz, Austria

Departments of <sup>3</sup>Internal Medicine, <sup>5</sup>Biochemistry, and <sup>6</sup>Surgery, Universities of Giessen and Marburg Lung Center, Giessen, Germany

<sup>4</sup>Department of Thoracic Surgery, Medical University of Vienna, Vienna, Austria

<sup>7</sup>Goethe University School of Medicine, Frankfurt am Main, Germany

<sup>8</sup>Center for Interstitial and Rare Lung Diseases Pneumology and Respiratory Critical Care Medicine, Thoraxklinik University of Heidelberg, Translational Lung Research Center Heidelberg (TLRC), Heidelberg, Germany

<sup>9</sup>Department of Pulmonology, Medical University of Graz, Graz, Austria

†Members of the German Center for Lung Research

### Supplementary material and methods

#### Fibroblast isolation

Human lung samples (1cm<sup>2</sup>) without apparent vessels, bronchi or pleural structures were isolated and cut into small pieces. After centrifugation, the supernatant was discarded and the pellet was resuspended in DMEM-F12 (1:1) medium (Gibco, Fisher Scientific, MA, USA) supplemented with 10% fetal calf serum (FCS), 0.2% Penicillin/Streptomycin (Gibco) and 1% Glutamin (Sigma-Aldrich, Hamburg, Germany), seeded in T<sub>75</sub> Flasks and incubated in humidified atmosphere of 5% CO<sub>2</sub> at 37°C and left for 7 days until cell outgrowth. The purity of isolated human lung fibroblasts (FB) was verified by positive staining for vimentin and fibronectin.

### ***In vitro* experiments**

Human lung fibroblasts were stimulated with 100nM smoothened agonist (SAG; Calbiochem, Darmstadt, Germany) in the absence or presence of 1.2mg/ml pirfenidone (Sigma-Aldrich) and/or 1 $\mu$ M JQ1 (kindly provided by Dr. M. Lauth, Institute of Molecular Biology and Tumor Research, Center for Tumor- and Immunobiology, Marburg, Germany) and the cells were collected 24 hours thereafter. In other experiments IPF(FB) were treated with 1.2mg/ml pirfenidone for 8 hours and subsequently harvested for global gene profiling. IPF(FB) were transfected with 50nM siRNA (SMARTpool: ON-TARGETplus CEMIP siRNA or Non-targeting siRNA; Dharmacon, Lafayette, CO) using the Effectene Transfection Reagent (Qiagen, Hilden, Germany) according to manufacturer's instruction. To measure proliferation, 10,000 siRNA-transfected cells were seeded onto 96-well plates. After a 24 hours regeneration period, cells were starved in basal medium DMEM-F12 (1:1) medium (Gibco) supplemented with 0.2% penicillin/streptomycin (Gibco) for 6 hours. Afterwards cells were stimulated for 24 hours with 10ng/ml PDGF-BB (Sigma-Aldrich) or 15ng/ml EGF (Peprotech, London, UK) and proliferation was determined by [<sup>3</sup>H]thymidine incorporation. Migration of IPF(FB) after knock-down of CEMIP was investigated by seeding 20,000 siRNA-transfected cells in two wells of a Wound Healing assay Cell Culture Insert (Ibidi, Munich, Germany). Cells were allowed to grow confluent for one day before removing the insert. Pictures were taken after 0, and 24 hours and images were analysed using the Image J software. To measure apoptosis, 40,000 siRNA-transfected IPF(FB) were seeded in 12-well plates for 48 hours. Supernatant and cells were collected and washed with binding buffer (10mM HEPES, 2.5mM CaCl<sub>2</sub>, 140mM NaCl, pH 7.4). Cells were stained with AnnexinV-FITC (1:50, eBioscience/Thermo Fisher Scientific, Waltham, MA) for 15 min at 4°C, followed by additional washing. One minute before measurement, 0.5 $\mu$ g/ml propidium iodide was added. Apoptosis was measured on a CytoFLEX flow cytometer (Beckman Coulter, Brea, CA) on a minimum of 5,000 events gated on single cells.

### **RNA isolation and reverse-transcription real-time quantitative RT-PCR**

RNA isolation and reverse-transcription real-time quantitative PCR (RT-qPCR) were performed as previously described [1]. The following oligonucleotide primers were used: CEMIP forward 5'-AGCAAACACTTCCTGCACCT-3', CEMIP reverse 5'-CAGA-GCCTCGATGTCCATGAT-3'; PBGD/HMBS forward 5'-ACCCTAGAAACCCTGCC-AGAGAA-3', PBGD/HMBS reverse 5'-GCCGGGTGTTGAGGTTTCCCC-3, Collagen

(COL) IA1 forward 5'- CCAAGAGGAAGGCCAAGTC-3', COLIA1 reverse 5'-CTCGGG-TTTCACACGTC -3'; Fibronectin (FN) forward 5'-CACCTCTGTGCAGACCACATC-3', FN reverse 5'-GTCTCTTGGCAGCTGACTCCG-3';  $\alpha$ -smooth muscle actin (SMA) forward 5'-GGGACTAAGACGGGAA-TCCT-3',  $\alpha$ -SMA reverse 5'-CAAAGCCGGCCT-TACAGAG-3'; matrix metalloprotease (MMP) 2 forward 5'-CTTCCAAGTCTGGAGC-GATGT-3', MMP2 reverse 5'-TACCGTCAAAGGGGTATCCAT-3'; p21 forward 5'-ACTCTCAGGGTCGAAAACGG-3', p21 reverse 5'-GATGTAGAGCGGGCCTTTGA-3', p53 forward 5'-GCCTTGGAAGTCAAGGATGC-3', p53 reverse 5'-GGCTGTCAGTGG-GGAACAAG-3'. PBGD served as a reference gene. Cycling conditions were 95°C for 6 min, followed by 45 cycles of 95°C for 20 s, 55°C for 30 s, and 73°C for 30 s. Melting curve analysis and gel electrophoresis was performed to confirm the exclusive amplification of the expected PCR product. Results are expressed as  $\Delta C_t$  ( $C_{tPBGD} - C_{t\text{target gene}}$ ).

### **Western blot analysis**

Ten  $\mu$ g cell/lung lysates were separated on a SDS polyacrylamide gel, followed by electrotransfer to a polyvinylidene difluoride (PVDF) membrane. After blocking with 5% non-fat dry milk in TBS-T buffer (25mM Tris-Cl, 150mM NaCl, 0.1% Tween 20, pH 7.5), the membrane was incubated overnight at 4°C with rabbit anti-CEMIP (Biozol, Eching, Germany), rabbit anti-p21 (Cell Signaling Technology, Frankfurt am Main, Germany), rabbit anti-COL I (Sigma-Aldrich), goat anti-MMP2 (R&D Systems, Wiesbaden, Germany), mouse anti- $\alpha$ -SMA (Merck Millipore, Darmstadt, Germany), mouse anti-FN (Enzo Life Sciences, Lörrach, Germany) and mouse anti-p53 (Santa Cruz Biotechnology, Heidelberg, Germany) antibodies. Afterwards, the membrane was incubated with peroxidase-labelled secondary antibody (Dako, Gostrup, Denmark). Final detection of proteins was performed using an ECL Plus Kit (Amersham Biosciences, Freiburg, Germany). As a loading control HSP70 (detected with a mouse anti-HSP70 antibody; Sigma-Aldrich) was used.

### **Enzyme-linked immunosorbent assay for CEMIP**

Detection of CEMIP antigens in plasma from pirfenidone-treated and non-treated IPF patients was performed using Human CEMIP/KIAA1199 ELISA Kit (LifeSpan BioSciences, Vienna, Austria) according to the manufacturer's instructions. The optical density was determined using a microplate reader at 450 nm.

### **Immunohistochemistry**

Lung tissue specimens were fixed with 4% formaldehyde in PBS and embedded in paraffin. Three  $\mu\text{m}$  sections were deparaffinized in xylene and rehydrated through graded ethanol washes. Immunohistochemistry was performed using ImmPress™ Kit with NovaRed Substrate (Vector Laboratories, Eching, Germany) according to the manufacturer's instruction. The following primary antibodies were used: rabbit anti-CEMIP (Bioss, Woburn, CA), rabbit anti-proSP-C (Millipore, Burlington, MA), rabbit anti- $\alpha\text{Sma}$  (Thermo Fisher Scientific, Waltham, MA), rabbit anti-CD45 (Abcam, Cambridge, UK) and rabbit anti-vWF (DAKO/Agilent, Santa-Clara, CA). Negative control was performed by replacing the primary antibody with a species-matched isotype control. Images were captured using an Olympus VS120 slide scanning microscope at 40 $\times$  magnification.

### **Immunofluorescence**

20,000 siRNA transfected IPF(FB) cells were seeded in 8-well chamber slides and cultured for 48 hours. Cells were washed with PBS and fixed with 1% PFA for 20 minutes on ice prior to blocking and permeabilization with 0.02% TritonX and 3% BSA in PBS for 60 minutes. The chamber slides were incubated overnight at 4°C with mouse anti- $\alpha\text{Sma}$  antibody (Sigma-Aldrich, Vienna, Austria) followed by AlexaFluor 488-anti-mouse secondary antibody for one hour and AlexaFluor 555-Phalloidin (Invitrogen, Carlsbad, CA) for 20 minutes at room temperature. Slides were mounted with DAPI mounting medium (Vectorshield) and sealed.

### **Affinity-histochemical staining of hyaluronan**

Four  $\mu\text{m}$  paraffin sections from pirfenidone-treated and non-treated IPF patients (n=7, each group) were deparaffinized in xylene, rehydrated and blocked in 3%  $\text{H}_2\text{O}_2$  for 10 minutes at room temperature. Next, sections were incubated in 50mM Tris, 150mM NaCl, pH 7.4 buffer containing 5 $\mu\text{g}/\text{ml}$  biotinylated HA-binding protein (bHABP, Merck Millipore) at 4°C overnight. Afterwards, sections were incubated with horseradish peroxidase-conjugated ExtrAvidin (Sigma-Aldrich). Staining was visualized with 3,3-diaminobenzidine peroxidase substrate (Vector Laboratories, Eching, Germany). To ensure specificity of staining, control sections were incubated with 100U hyaluronidase (Sigma-Aldrich) for 30 minutes at 37°C prior to incubation with bHABP. Finally, the sections were counterstained with hematoxylin (AppliChem, Darmstadt, Germany). Histological examinations were performed in a blinded fashion by two independent observers. For histological examinations, HA staining was determined by DAB signal quantification of at least 5 high-power fields (magnification,

×200) per section for each sample utilizing the Fiji Colour Deconvolution plugin (NIH, Bethesda, MD; <https://imagej.net/Fiji/Downloads>) which implements stain separation using Ruifrok & Johnston's method [2].

### ***In silico* transcription factor binding site analysis**

Transcription factor binding site analysis was performed with the ConTra v3 web server [3]. The CEMIP promoter region, up to 1kb upstream of transcription start site (NCBI reference sequence: NM\_018689) was analyzed. The positional weight matrix motif V\$GLI1\_Q2,M01042 (TRANSFAC20113 database) was selected for visualization with a core stringency of 0.90 and similarity stringency of 0.75.

### **Gene expression profiling**

Purified total RNA was amplified and Cy3-labeled using the LIRAK kit (Agilent) following the kit instructions. Per reaction, 200 ng of total RNA was used. The Cy-labeled aRNA was hybridized overnight to 8x60K 60-mer oligonucleotide spotted microarray slides (Agilent Technologies, design ID 074809). Hybridization and subsequent washing and drying of the slides was performed following the Agilent hybridization protocol as described [4]. The dried slides were scanned at 2 µm/pixel resolution using the InnoScan 900 (Innopsys, Carbonne, France). Image analysis was performed with Mapix 6.5.0 software, and calculated values for all spots were saved as GenePix results files. Stored data were evaluated using the R software [5] and the limma package [6] from BioConductor [7]. Log mean spot signals were taken for further analysis. Data was background corrected using the NormExp procedure on the negative control spots and quantile-normalized [6, 8] before averaging. Genes were ranked for differential expression using a moderated t-statistic [6]. Pathway analyses were done using gene set tests on the ranks of the t-values [6].

### **Statistics**

The statistical analysis was performed in GraphPad Prism 5.02 (GraphPad Software Inc., La Jolla, CA). Data are presented as mean±SD. Data from multiple groups were compared for statistical significance using the Kruskal-Wallis test Dunn's post-hoc test. All tests were performed with an undirected hypothesis. The level of statistical significance was set at 5%.

## Supplementary references

1. Wygrecka M, Marsh LM, Morty RE, Henneke I, Guenther A, Lohmeyer J, Markart P, Preissner KT. Enolase-1 promotes plasminogen-mediated recruitment of monocytes to the acutely inflamed lung. *Blood* 2009; 113(22): 5588-5598.
2. Ruifrok AC, Johnston DA. Quantification of histochemical staining by color deconvolution. *Analytical and quantitative cytology and histology* 2001; 23(4): 291-299.
3. Kreft L, Botzki A, Coppens F, Vandepoele K, Van Bel M. PhyD3: a phylogenetic tree viewer with extended phyloXML support for functional genomics data visualization. *Bioinformatics* 2017; 33(18): 2946-2947.
4. Hoffmann J, Wilhelm J, Marsh LM, Ghanim B, Klepetko W, Kovacs G, Olschewski H, Olschewski A, Kwapiszewska G. Distinct differences in gene expression patterns in pulmonary arteries of patients with chronic obstructive pulmonary disease and idiopathic pulmonary fibrosis with pulmonary hypertension. *American journal of respiratory and critical care medicine* 2014; 190(1): 98-111.
5. R Development Core Team. R: A language and environment for statistical computing. R Foundation for Statistical Computing, Vienna, Austria. 2007; ISBN 3-900051-07-0: URL: [www.R-project.org](http://www.R-project.org).
6. Ritchie ME, Phipson B, Wu D, Hu Y, Law CW, Shi W, Smyth GK. limma powers differential expression analyses for RNA-sequencing and microarray studies. *Nucleic acids research* 2015; 43(7): e47.
7. Gentleman RC, Carey VJ, Bates DM, Bolstad B, Dettling M, Dudoit S, Ellis B, Gautier L, Ge Y, Gentry J, Hornik K, Hothorn T, Huber W, Iacus S, Irizarry R, Leisch F, Li C, Maechler M, Rossini AJ, Sawitzki G, Smith C, Smyth G, Tierney L, Yang JY, Zhang J. Bioconductor: open software development for computational biology and bioinformatics. *Genome biology* 2004; 5(10): R80.
8. Silver JD, Ritchie ME, Smyth GK. Microarray background correction: maximum likelihood estimation for the normal-exponential convolution. *Biostatistics* 2009; 10(2): 352-363.

## Supplementary figures and tables

**Supplementary Figure S1. Lung tissue sections obtained from idiopathic pulmonary fibrosis (IPF) patients untreated or treated with pirfenidone.** Haematoxylin and eosin stained human lung tissues depicting morphological characteristics (from five patients treated and five not treated with pirfenidone).

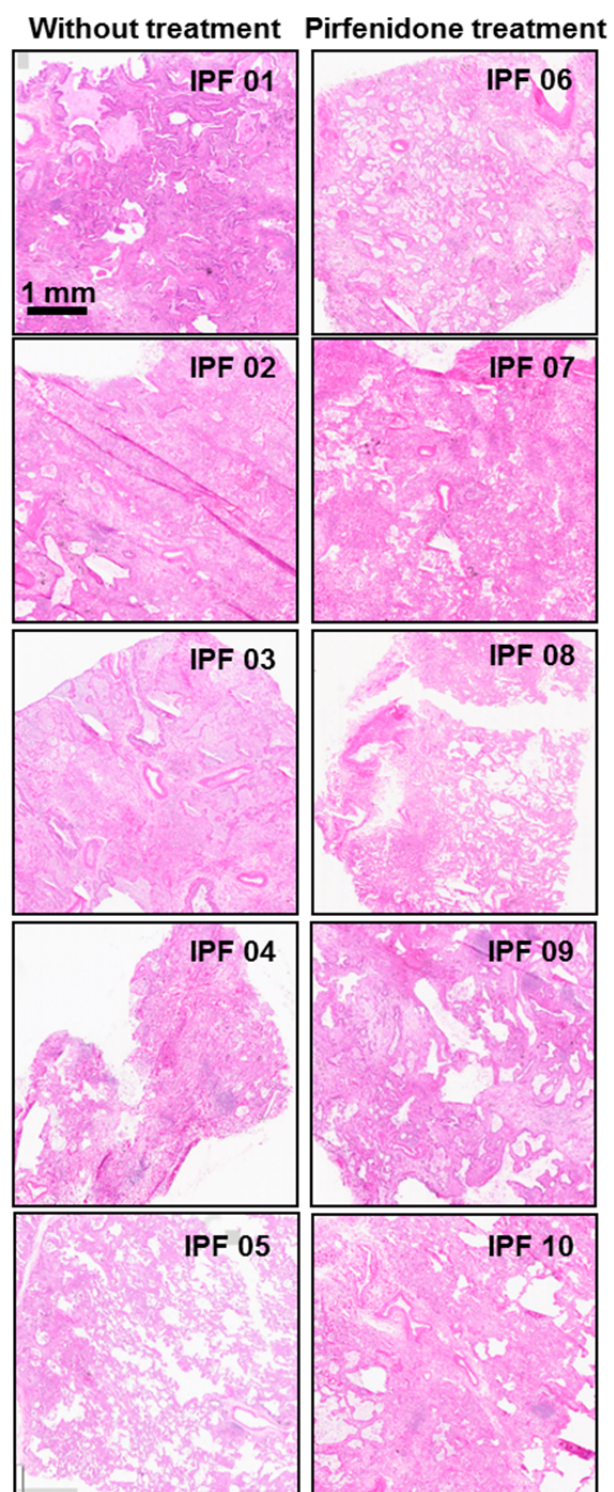



**Supplementary Figure S2: Protein-protein interactions in GO nodes ECM and immune cell response.** Representation of minimum network analysis showing core protein-protein interactions within the GO nodes, immune cell response and ECM, with expressional annotation for LH in ECM network (A) and for FB in immune cell response (B) (complementary network to figure 2D and E).

A

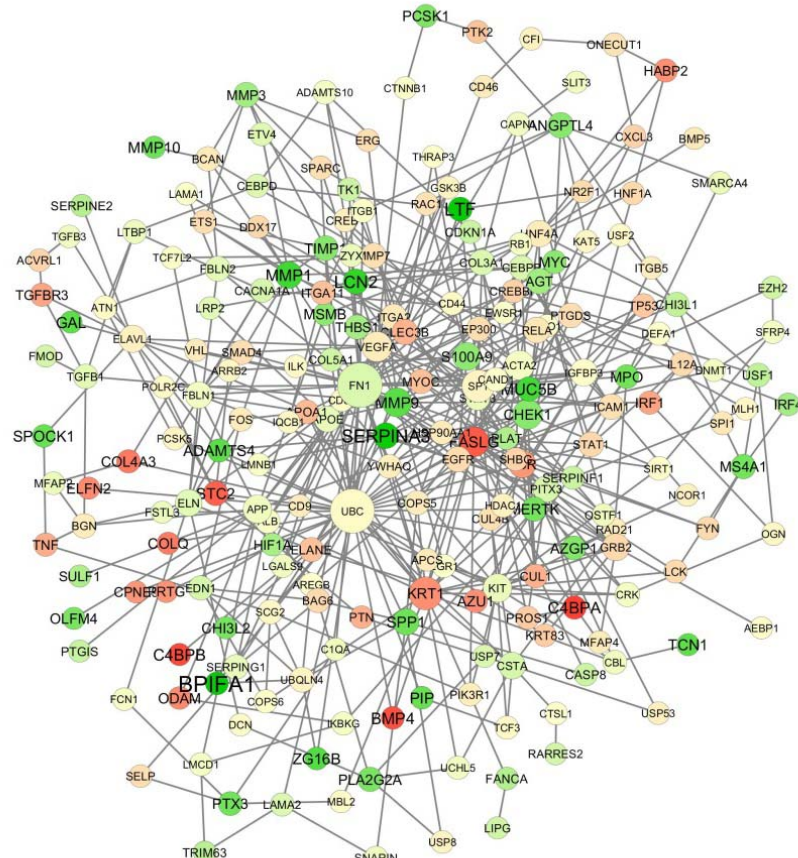

B

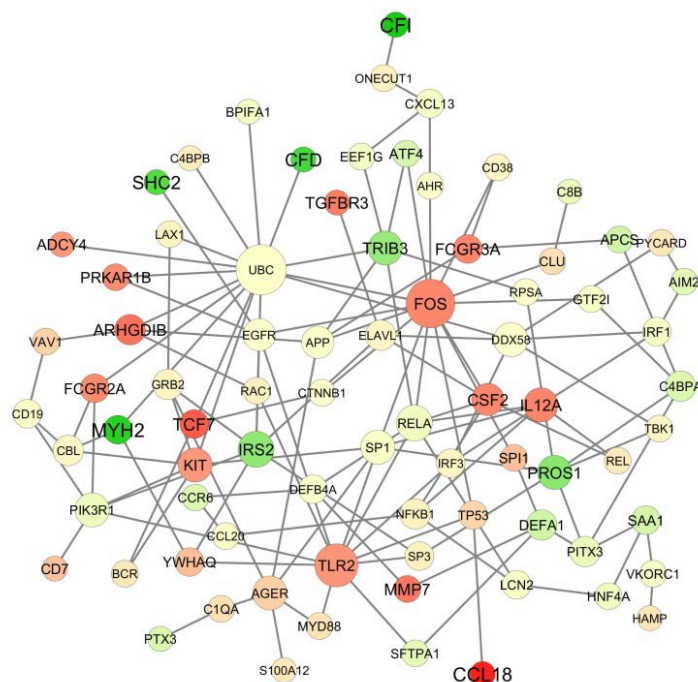



**Supplementary Figure S3. Regulation of genes in representative inflammatory and ECM KEGG pathway maps.** Gene expression data for the LH samples (a) and FB (b) samples are depicted in color coding for **A)** B cell receptor signaling pathway (04662), **B)** T cell receptor signaling pathway (04660) and **C)** ECM-receptor interaction (04512).

A

a)

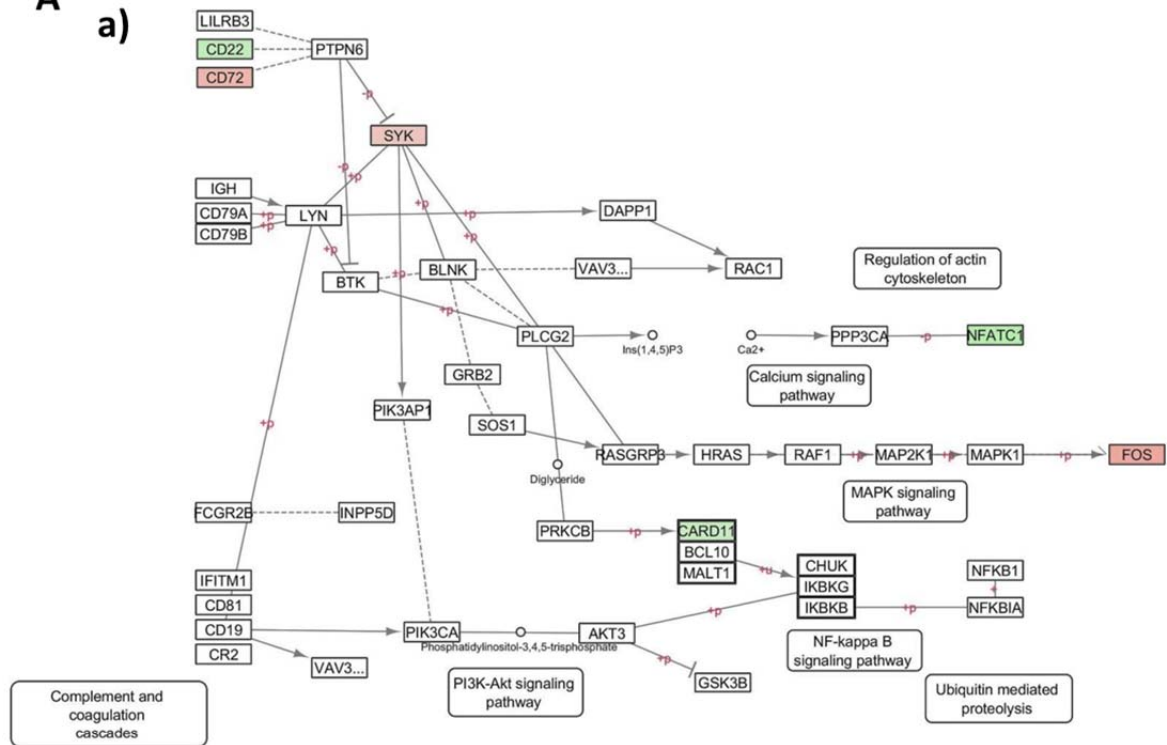

b)

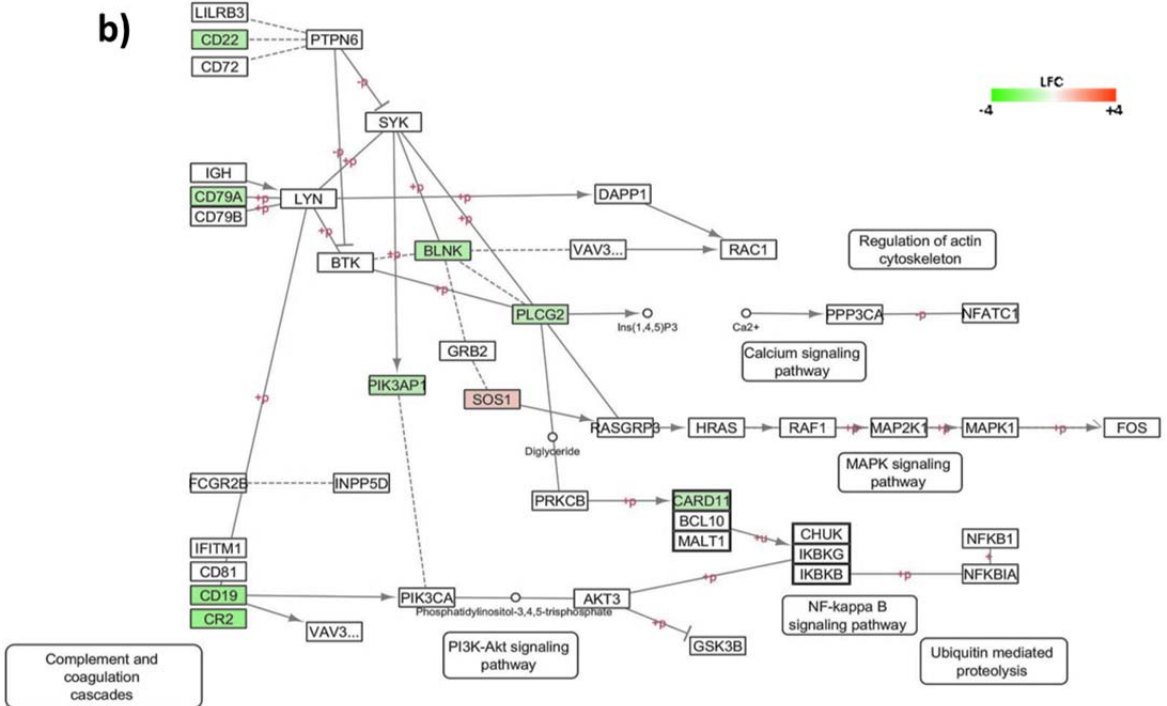

**a)**

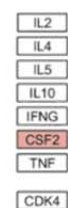

**b)**

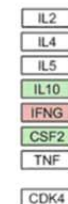

c

a)

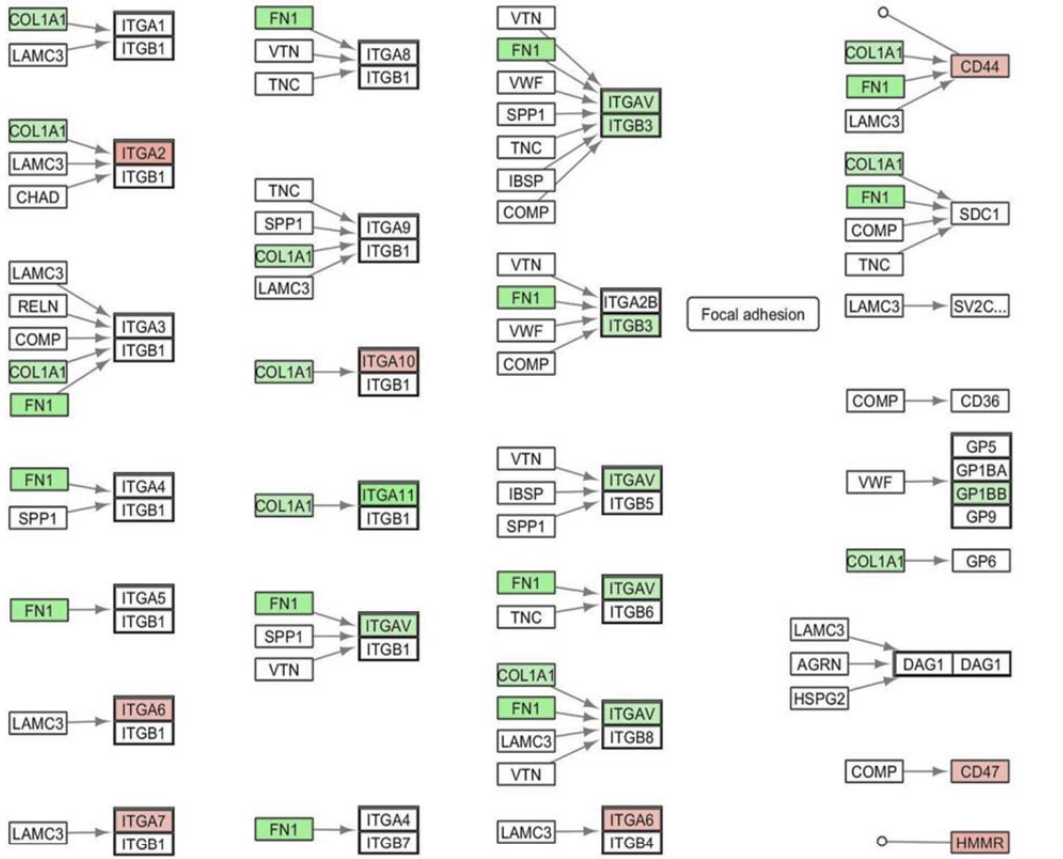

b)

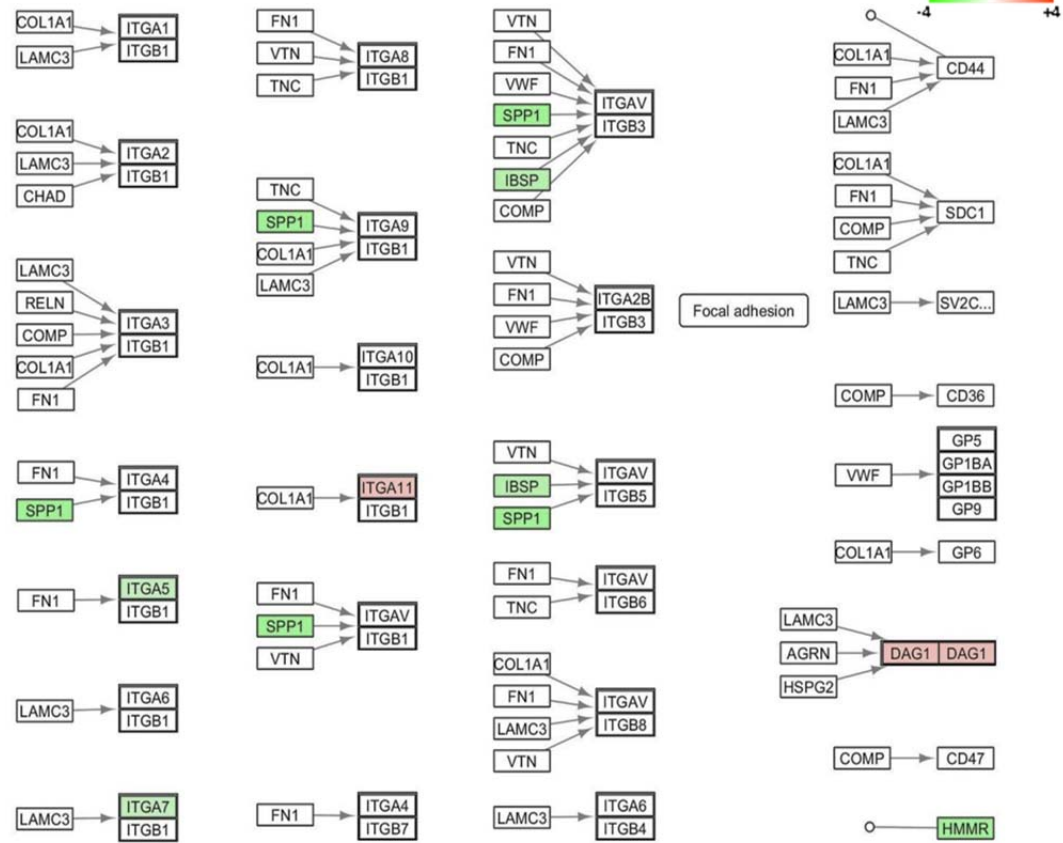

**Supplementary Figure S4. Regulation of CEMIP by Hedgehog signalling.** A) *In silico* CEMIP gene promoter analysis with GLI consensus binding using the TRANSFAC20113 position weight matrix M01042. B) CEMIP expression in donor FB treated with the Hedgehog agonist SAG in the absence or presence of the GLI1/2 inhibitor JQ1 and/or pirfenidone. DMSO was used as a vehicle. HSP70 was used as a loading control. n=4, for statistical analysis Mann Whitney or One-way ANOVA with Tukey's multiple comparisons test was used. \*p<0.05, \*\*p<0.01.

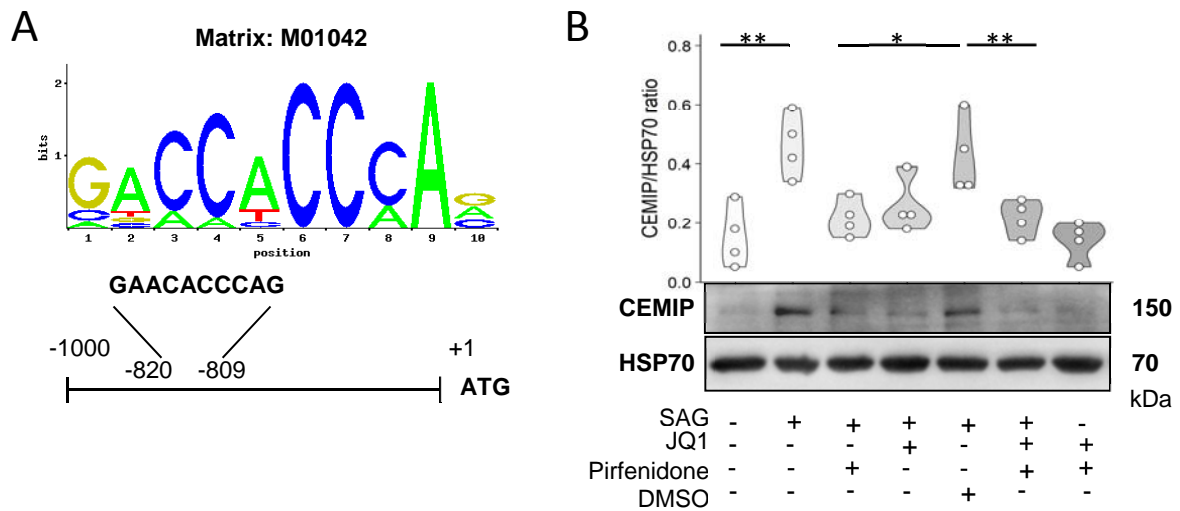

**Supplementary Table S1.** Annotated genes with  $\log_2(\text{fold-change}) > 1$  in at least one contrast. Oppositely regulated genes were defined having a  $\text{LFC} > 1.41$  in one sample type and  $\text{LFC} < 0.5$  in the other. Numbers represent mean  $\log_2(\text{fold-change}) \pm$  the half width of the 95% confidence interval. Values in brackets are significances as  $-\log_{10}(\text{P-value})$ .

| GENE SYMBOL         | GENE NAME                                                      | ENTREZ ID | SPOT ID        | IPF+P(LH) - IPF(LH)     | IPF+P(FB) - IPF(FB)     | Regulation |
|---------------------|----------------------------------------------------------------|-----------|----------------|-------------------------|-------------------------|------------|
| <b>XIST</b>         | X inactive specific transcript (non-protein coding)            | 7503      | A_19_P00323692 | $-3.80 \pm 4.03$ (1.20) | $2.03 \pm 3.54$ (0.61)  | opposite   |
| <b>MMP1</b>         | matrix metalloproteinase 1 (interstitial collagenase)          | 4312      | A_23_P1691     | $-1.87 \pm 2.58$ (0.83) | $1.07 \pm 2.18$ (0.49)  | opposite   |
| <b>SPC25</b>        | SPC25, NDC80 kinetochore complex component                     | 57405     | A_23_P51085    | $-1.52 \pm 1.05$ (2.20) | $1.09 \pm 0.89$ (1.74)  | opposite   |
| <b>CDKN3</b>        | cyclin-dependent kinase inhibitor 3                            | 1033      | A_23_P48669    | $-1.41 \pm 0.96$ (2.25) | $1.38 \pm 0.81$ (2.76)  | opposite   |
| <b>ANLN</b>         | anillin, actin binding protein                                 | 54443     | A_23_P356684   | $-1.28 \pm 1.15$ (1.52) | $1.01 \pm 0.97$ (1.37)  | opposite   |
| <b>SHCBP1</b>       | SHC SH2-domain binding protein 1                               | 79801     | A_32_P96719    | $-1.18 \pm 0.93$ (1.81) | $1.08 \pm 0.79$ (2.02)  | opposite   |
| <b>BIRC5</b>        | baculoviral IAP repeat containing 5                            | 332       | A_23_P118815   | $-1.16 \pm 1.01$ (1.59) | $1.03 \pm 0.85$ (1.71)  | opposite   |
| <b>BLM</b>          | Bloom syndrome, RecQ helicase-like                             | 641       | A_23_P88630    | $-1.07 \pm 0.99$ (1.46) | $1.08 \pm 0.84$ (1.88)  | opposite   |
| <b>CXCL8</b>        | chemokine (C-X-C motif) ligand 8                               | 3576      | A_32_P87013    | $-1.03 \pm 1.52$ (0.76) | $1.32 \pm 1.28$ (1.36)  | opposite   |
| <b>METTL7B</b>      | methyltransferase like 7B                                      | 196410    | A_24_P64653    | $-1.02 \pm 1.01$ (1.31) | $1.07 \pm 0.85$ (1.80)  | opposite   |
| <b>AREG</b>         | amphiregulin                                                   | 374       | A_23_P259071   | $-1.00 \pm 1.38$ (0.83) | $1.24 \pm 1.17$ (1.42)  | opposite   |
| <b>RPS4Y1</b>       | ribosomal protein S4, Y-linked 1                               | 6192      | A_23_P259314   | $3.57 \pm 4.92$ (0.83)  | $-1.23 \pm 4.16$ (0.26) | opposite   |
| <b>RPS4Y2</b>       | ribosomal protein S4, Y-linked 2                               | 140032    | A_23_P324384   | $3.37 \pm 4.88$ (0.78)  | $-1.29 \pm 4.12$ (0.28) | opposite   |
| <b>TTY15</b>        | testis-specific transcript, Y-linked 15 (non-protein coding)   | 64595     | A_21_P0006594  | $2.49 \pm 2.72$ (1.15)  | $-1.39 \pm 2.39$ (0.62) | opposite   |
| <b>DDX3Y</b>        | DEAD (Asp-Glu-Ala-Asp) box helicase 3, Y-linked                | 8653      | A_33_P3224331  | $2.17 \pm 2.99$ (0.83)  | $-1.78 \pm 2.63$ (0.75) | opposite   |
| <b>TNNT2</b>        | troponin T type 2 (cardiac)                                    | 7139      | A_23_P34700    | $1.62 \pm 1.69$ (1.23)  | $-1.93 \pm 1.43$ (2.00) | opposite   |
| <b>HTR2B</b>        | 5-hydroxytryptamine (serotonin) receptor 2B, G protein-coupled | 3357      | A_23_P16953    | $1.23 \pm 1.62$ (0.88)  | $-1.18 \pm 1.37$ (1.06) | opposite   |
| <b>LOC100128288</b> | uncharacterized LOC100128288                                   |           | A_24_P256415   | $1.05 \pm 0.91$ (1.58)  | $-1.14 \pm 0.77$ (2.27) | opposite   |
| <b>GREM2</b>        | gremlin 2, DAN family BMP antagonist                           | 64388     | A_24_P40626    | $1.70 \pm 1.56$ (1.48)  | $1.07 \pm 1.32$ (0.97)  | both up    |
| <b>GPR128</b>       | G protein-coupled receptor 128                                 | 84873     | A_23_P40919    | $1.32 \pm 2.23$ (0.63)  | $1.31 \pm 1.88$ (0.78)  | both up    |
| <b>GSTT2B</b>       | glutathione S-transferase theta 2B (gene/pseudogene)           | 653689    | A_33_P3289045  | $1.01 \pm 1.82$ (0.58)  | $1.43 \pm 1.54$ (1.18)  | both up    |

|                 |                                                                                     |        |                |                     |                     |            |
|-----------------|-------------------------------------------------------------------------------------|--------|----------------|---------------------|---------------------|------------|
| <b>SERPINA3</b> | serpin peptidase inhibitor, clade A (alpha-1 antiproteinase, antitrypsin), member 3 | 12     | A_33_P3399788  | -2.39 ± 1.60 (2.30) | -1.96 ± 1.35 (2.20) | both down  |
| <b>HRK</b>      | harakiri, BCL2 interacting protein                                                  | 8739   | A_23_P25194    | -1.40 ± 1.74 (0.96) | -1.22 ± 1.47 (1.00) | both down  |
| <b>KCNQ1</b>    | potassium channel, voltage gated modifier subfamily G, member 1                     | 3755   | A_22_P00005343 | -1.37 ± 1.26 (1.47) | -1.14 ± 1.06 (1.43) | both down  |
| <b>MFAP5</b>    | microfibrillar associated protein 5                                                 | 8076   | A_33_P3708413  | -1.27 ± 2.00 (0.69) | -1.32 ± 1.69 (0.92) | both down  |
| <b>TENM2</b>    | teneurin transmembrane protein 2                                                    | 57451  | A_24_P299474   | -1.23 ± 2.34 (0.54) | -2.02 ± 1.98 (1.34) | both down  |
| <b>SCRG1</b>    | stimulator of chondrogenesis 1                                                      | 11341  | A_23_P167159   | -1.02 ± 2.12 (0.48) | -2.35 ± 1.79 (1.92) | both down  |
| <b>CEMIP</b>    | cell migration inducing protein, hyaluronan binding                                 | 57214  | A_23_P324754   | -1.01 ± 1.17 (1.06) | -1.13 ± 0.99 (1.58) | both down  |
| <b>BPIFA1</b>   | BPI fold containing family A, member 1                                              | 51297  | A_33_P3245228  | -3.98 ± 2.35 (2.74) | -0.11 ± 1.99 (0.04) | only in LH |
| <b>SAA1</b>     | serum amyloid A1                                                                    | 6288   | A_24_P335092   | -3.72 ± 2.35 (2.49) | -0.40 ± 1.99 (0.17) | only in LH |
| <b>SAA2</b>     | serum amyloid A2                                                                    | 6289   | A_33_P3408918  | -3.49 ± 2.21 (2.49) | -0.06 ± 1.86 (0.02) | only in LH |
| <b>CXCL6</b>    | chemokine (C-X-C motif) ligand 6                                                    | 6372   | A_23_P155755   | -2.59 ± 1.46 (2.91) | -0.07 ± 1.24 (0.04) | only in LH |
| <b>DEFB4A</b>   | defensin, beta 4A                                                                   | 1673   | A_23_P157628   | -2.52 ± 1.66 (2.35) | -0.05 ± 1.40 (0.02) | only in LH |
| <b>SAA4</b>     | serum amyloid A4, constitutive                                                      | 6291   | A_23_P87238    | -2.46 ± 1.55 (2.50) | -0.20 ± 1.31 (0.12) | only in LH |
| <b>PI15</b>     | peptidase inhibitor 15                                                              | 51050  | A_33_P3254096  | -2.45 ± 1.71 (2.17) | -0.28 ± 1.44 (0.16) | only in LH |
| <b>TNFRSF17</b> | tumor necrosis factor receptor superfamily, member 17                               | 608    | A_23_P37736    | -2.16 ± 0.79 (5.14) | -0.19 ± 0.67 (0.25) | only in LH |
| <b>USP9Y</b>    | ubiquitin specific peptidase 9, Y-linked                                            | 8287   | A_33_P3217700  | 2.12 ± 2.48 (1.04)  | -0.31 ± 2.10 (0.12) | only in LH |
| <b>SERPIND1</b> | serpin peptidase inhibitor, clade D (heparin cofactor), member 1                    | 3053   | A_33_P3241511  | 2.12 ± 1.42 (2.30)  | -0.18 ± 1.20 (0.12) | only in LH |
| <b>CLDN18</b>   | claudin 18                                                                          | 51208  | A_33_P3240752  | 2.09 ± 2.92 (0.82)  | 0.03 ± 2.47 (0.01)  | only in LH |
| <b>MT1H</b>     | metallothionein 1H                                                                  | 4496   | A_33_P3368313  | -2.03 ± 1.34 (2.34) | 0.03 ± 1.13 (0.02)  | only in LH |
| <b>LCN2</b>     | lipocalin 2                                                                         | 3934   | A_23_P169437   | -2.02 ± 1.23 (2.62) | -0.06 ± 1.04 (0.04) | only in LH |
| <b>MZB1</b>     | marginal zone B and B1 cell-specific protein                                        | 51237  | A_23_P84596    | -1.94 ± 0.94 (3.59) | -0.40 ± 0.79 (0.50) | only in LH |
| <b>KRT5</b>     | keratin 5, type II                                                                  | 3852   | A_23_P218047   | -1.93 ± 2.47 (0.92) | -0.31 ± 2.09 (0.12) | only in LH |
| <b>ACSM1</b>    | acyl-CoA synthetase medium-chain family member 1                                    | 116285 | A_23_P106933   | 1.89 ± 0.61 (5.90)  | -0.32 ± 0.54 (0.64) | only in LH |
| <b>FCRL5</b>    | Fc receptor-like 5                                                                  | 83416  | A_23_P201211   | -1.88 ± 0.65 (5.50) | -0.34 ± 0.55 (0.68) | only in LH |
| <b>BPIFB1</b>   | BPI fold containing family B, member 1                                              | 92747  | A_23_P154784   | -1.87 ± 1.92 (1.25) | -0.41 ± 1.62 (0.22) | only in LH |
| <b>IRF5</b>     | interferon regulatory factor 5                                                      | 3663   | A_23_P500271   | -1.87 ± 1.43 (1.91) | 0.04 ± 1.21 (0.03)  | only in LH |



|                     |                                                           |           |                |                     |                     |            |
|---------------------|-----------------------------------------------------------|-----------|----------------|---------------------|---------------------|------------|
| <b>C4BPA</b>        | complement component 4 binding protein, alpha             | 722       | A_23_P97541    | 1.87 ± 1.05 (2.95)  | -0.34 ± 0.89 (0.36) | only in LH |
| <b>MUC5B</b>        | mucin 5B, oligomeric mucus/gel-forming                    | 727897    | A_24_P102650   | -1.84 ± 1.47 (1.79) | 0.08 ± 1.24 (0.05)  | only in LH |
| <b>GDF10</b>        | growth differentiation factor 10                          | 2662      | A_23_P52227    | 1.80 ± 2.29 (0.93)  | 0.04 ± 1.94 (0.02)  | only in LH |
| <b>KLK12</b>        | kallikrein-related peptidase 12                           | 43849     | A_23_P500010   | -1.79 ± 1.93 (1.17) | -0.19 ± 1.63 (0.09) | only in LH |
| <b>C4BPB</b>        | complement component 4 binding protein, beta              | 725       | A_23_P319598   | 1.77 ± 0.86 (3.54)  | 0.18 ± 0.73 (0.22)  | only in LH |
| <b>IL1R2</b>        | interleukin 1 receptor, type II                           | 7850      | A_24_P63019    | -1.74 ± 1.10 (2.48) | 0.41 ± 0.93 (0.43)  | only in LH |
| <b>KRT6A</b>        | keratin 6A, type II                                       | 3853      | A_33_P3292886  | -1.73 ± 3.34 (0.53) | -0.26 ± 2.82 (0.07) | only in LH |
| <b>CLIC3</b>        | chloride intracellular channel 3                          | 9022      | A_33_P3336686  | 1.73 ± 1.66 (1.39)  | -0.30 ± 1.40 (0.18) | only in LH |
| <b>GDF11</b>        | growth differentiation factor 11                          | 10220     | A_23_P76102    | -1.73 ± 0.79 (3.88) | 0.33 ± 0.67 (0.49)  | only in LH |
| <b>ZNF215</b>       | zinc finger protein 215                                   | 7762      | A_23_P53057    | -1.72 ± 0.75 (4.09) | 0.07 ± 0.64 (0.08)  | only in LH |
| <b>CA4</b>          | carbonic anhydrase IV                                     | 762       | A_23_P4096     | 1.71 ± 1.55 (1.49)  | 0.01 ± 1.31 (0.01)  | only in LH |
| <b>SERPINB4</b>     | serpin peptidase inhibitor, clade B (ovalbumin), member 4 | 6318      | A_23_P502413   | -1.69 ± 1.56 (1.46) | -0.17 ± 1.32 (0.10) | only in LH |
| <b>LAX1</b>         | lymphocyte transmembrane adaptor 1                        | 54900     | A_23_P438      | -1.68 ± 0.94 (2.94) | 0.12 ± 0.80 (0.12)  | only in LH |
| <b>CA3</b>          | carbonic anhydrase III                                    | 761       | A_23_P20316    | -1.67 ± 1.12 (2.27) | 0.02 ± 0.95 (0.01)  | only in LH |
| <b>UCN3</b>         | urocortin 3                                               | 114131    | A_33_P3241369  | 1.65 ± 0.88 (3.14)  | 0.06 ± 0.74 (0.06)  | only in LH |
| <b>SOSTDC1</b>      | sclerostin domain containing 1                            | 25928     | A_23_P145841   | 1.64 ± 1.72 (1.22)  | 0.01 ± 1.45 (0.01)  | only in LH |
| <b>CHRM1</b>        | cholinergic receptor, muscarinic 1                        | 1128      | A_33_P3367860  | 1.64 ± 1.70 (1.24)  | 0.09 ± 1.44 (0.05)  | only in LH |
| <b>SPAG4</b>        | sperm associated antigen 4                                | 6676      | A_23_P132027   | -1.64 ± 0.80 (3.57) | -0.02 ± 0.67 (0.03) | only in LH |
| <b>PRB2</b>         | proline-rich protein BstNI subfamily 2                    | 653247    | A_23_P139434   | -1.63 ± 1.73 (1.20) | 0.02 ± 1.46 (0.01)  | only in LH |
| <b>CXCL13</b>       | chemokine (C-X-C motif) ligand 13                         | 10563     | A_23_P121695   | -1.63 ± 1.29 (1.83) | -0.06 ± 1.09 (0.04) | only in LH |
| <b>ZNF300P1</b>     | zinc finger protein 300 pseudogene 1 (functional)         |           | A_24_P300302   | 1.63 ± 1.11 (2.25)  | -0.21 ± 0.94 (0.19) | only in LH |
| <b>CNTN6</b>        | contactin 6                                               | 27255     | A_33_P3329378  | 1.63 ± 1.01 (2.57)  | 0.30 ± 0.85 (0.32)  | only in LH |
| <b>LOC100652999</b> | uncharacterized LOC100652999                              | 100652999 | A_22_P00023251 | 1.62 ± 1.07 (2.32)  | 0.43 ± 0.91 (0.48)  | only in LH |
| <b>HPGD</b>         | hydroxyprostaglandin dehydrogenase 15-(NAD)               | 3248      | A_24_P71904    | 1.61 ± 1.60 (1.31)  | -0.36 ± 1.35 (0.23) | only in LH |
| <b>FASLG</b>        | Fas ligand (TNF superfamily, member 6)                    | 356       | A_23_P369815   | 1.61 ± 0.92 (2.87)  | 0.18 ± 0.77 (0.20)  | only in LH |
| <b>FCRL1</b>        | Fc receptor-like 1                                        | 115350    | A_33_P3294504  | -1.61 ± 0.87 (3.12) | -0.11 ± 0.73 (0.12) | only in LH |
| <b>KRT6C</b>        | keratin 6C, type II                                       | 286887    | A_23_P366936   | -1.60 ± 1.96 (0.98) | -0.48 ± 1.65 (0.26) | only in LH |
| <b>AGER</b>         | advanced glycosylation end product-specific receptor      | 177       | A_23_P93360    | 1.60 ± 1.78 (1.12)  | 0.46 ± 1.51 (0.27)  | only in LH |

|                     |                                                                                |           |                |                     |                     |            |
|---------------------|--------------------------------------------------------------------------------|-----------|----------------|---------------------|---------------------|------------|
| <b>ADAMTS4</b>      | ADAM metallopeptidase with thrombospondin type 1 motif, 4                      | 9507      | A_23_P360754   | -1.60 ± 1.47 (1.46) | -0.20 ± 1.24 (0.13) | only in LH |
| <b>CD19</b>         | CD19 molecule                                                                  | 930       | A_23_P113572   | -1.60 ± 1.22 (1.89) | -0.03 ± 1.04 (0.02) | only in LH |
| <b>WIF1</b>         | WNT inhibitory factor 1                                                        | 11197     | A_32_P216520   | 1.59 ± 1.71 (1.18)  | 0.43 ± 1.45 (0.26)  | only in LH |
| <b>GAL</b>          | galanin/GMAP prepropeptide                                                     | 51083     | A_23_P374844   | -1.58 ± 1.57 (1.31) | 0.19 ± 1.33 (0.12)  | only in LH |
| <b>ZBED2</b>        | zinc finger, BED-type containing 2                                             | 79413     | A_23_P113793   | 1.58 ± 1.28 (1.75)  | 0.47 ± 1.08 (0.43)  | only in LH |
| <b>C8B</b>          | complement component 8, beta polypeptide                                       | 732       | A_33_P3423854  | 1.58 ± 1.20 (1.92)  | -0.20 ± 1.02 (0.16) | only in LH |
| <b>MED4-AS1</b>     | MED4 antisense RNA 1                                                           | 100873965 | A_22_P00011103 | 1.57 ± 1.21 (1.88)  | 0.41 ± 1.02 (0.38)  | only in LH |
| <b>CADM3-AS1</b>    | CADM3 antisense RNA 1                                                          |           | A_33_P3359953  | -1.57 ± 0.77 (3.51) | -0.30 ± 0.65 (0.45) | only in LH |
| <b>TCN1</b>         | transcobalamin I (vitamin B12 binding protein, R binder family)                | 6947      | A_23_P64372    | -1.56 ± 1.36 (1.58) | 0.20 ± 1.15 (0.14)  | only in LH |
| <b>SCTR</b>         | secretin receptor                                                              | 6344      | A_23_P28139    | 1.56 ± 1.16 (1.98)  | -0.28 ± 0.98 (0.25) | only in LH |
| <b>SLC5A5</b>       | solute carrier family 5 (sodium/iodide cotransporter), member 5                | 6528      | A_23_P101774   | 1.56 ± 0.86 (3.02)  | 0.23 ± 0.72 (0.29)  | only in LH |
| <b>BANCR</b>        | BRAF-activated non-protein coding RNA                                          |           | A_22_P00001400 | 1.56 ± 0.83 (3.16)  | 0.17 ± 0.73 (0.19)  | only in LH |
| <b>CYP2F1</b>       | cytochrome P450, family 2, subfamily F, polypeptide 1                          | 1572      | A_23_P89981    | -1.55 ± 1.65 (1.19) | 0.10 ± 1.40 (0.05)  | only in LH |
| <b>S100A12</b>      | S100 calcium binding protein A12                                               | 6283      | A_23_P74001    | -1.54 ± 0.99 (2.43) | 0.23 ± 0.84 (0.24)  | only in LH |
| <b>TPTE2P3</b>      | transmembrane phosphoinositide 3-phosphatase and tensin homolog 2 pseudogene 3 |           | A_32_P48134    | 1.54 ± 0.86 (2.98)  | -0.19 ± 0.72 (0.23) | only in LH |
| <b>C11orf21</b>     | chromosome 11 open reading frame 21                                            | 29125     | A_33_P3377229  | 1.52 ± 0.79 (3.27)  | -0.14 ± 0.69 (0.17) | only in LH |
| <b>MIA2</b>         | melanoma inhibitory activity 2                                                 | 117153    | A_23_P117387   | 1.52 ± 0.77 (3.32)  | 0.37 ± 0.68 (0.57)  | only in LH |
| <b>MUCL1</b>        | mucin-like 1                                                                   | 118430    | A_23_P150979   | -1.51 ± 1.77 (1.04) | 0.14 ± 1.50 (0.07)  | only in LH |
| <b>ECEL1P2</b>      | endothelin converting enzyme-like 1, pseudogene 2                              | 347694    | A_33_P3610406  | 1.51 ± 1.26 (1.68)  | -0.26 ± 1.07 (0.21) | only in LH |
| <b>ARL14</b>        | ADP-ribosylation factor-like 14                                                | 80117     | A_23_P92161    | 1.51 ± 0.90 (2.69)  | -0.44 ± 0.79 (0.59) | only in LH |
| <b>LOC101928794</b> | uncharacterized LOC101928794                                                   |           | A_21_P0014149  | 1.51 ± 0.71 (3.72)  | 0.03 ± 0.60 (0.04)  | only in LH |
| <b>C12orf80</b>     | chromosome 12 open reading frame 80                                            |           | A_22_P00008937 | -1.51 ± 0.63 (4.38) | -0.46 ± 0.53 (1.06) | only in LH |
| <b>NCKAP5</b>       | NCK-associated protein 5                                                       | 344148    | A_23_P360079   | 1.50 ± 1.42 (1.41)  | -0.25 ± 1.24 (0.16) | only in LH |
| <b>SEPSECS-AS1</b>  | SEPSECS antisense RNA 1 (head to head)                                         |           | A_21_P0000709  | 1.50 ± 0.73 (3.55)  | 0.03 ± 0.62 (0.04)  | only in LH |
| <b>IHH</b>          | indian hedgehog                                                                | 3549      | A_33_P3338698  | 1.49 ± 0.80 (3.09)  | 0.01 ± 0.68 (0.01)  | only in LH |
| <b>SPRR1B</b>       | small proline-rich protein 1B                                                  | 6699      | A_23_P159406   | -1.48 ± 2.00 (0.85) | 0.08 ± 1.76 (0.03)  | only in LH |

|                     |                                                                          |        |               |                     |                     |            |
|---------------------|--------------------------------------------------------------------------|--------|---------------|---------------------|---------------------|------------|
| <b>S100P</b>        | S100 calcium binding protein P                                           | 6286   | A_23_P58266   | -1.48 ± 1.23 (1.70) | -0.08 ± 1.04 (0.06) | only in LH |
| <b>FPR2</b>         | formyl peptide receptor 2                                                | 2358   | A_23_P55649   | -1.48 ± 1.19 (1.78) | -0.04 ± 1.05 (0.03) | only in LH |
| <b>LOC101928152</b> | uncharacterized LOC101928152                                             |        | A_21_P0014466 | -1.48 ± 0.89 (2.67) | -0.34 ± 0.75 (0.45) | only in LH |
| <b>CACNA2D1</b>     | calcium channel, voltage-dependent, alpha 2/delta subunit 1              | 781    | A_23_P82379   | -1.48 ± 0.75 (3.40) | 0.04 ± 0.63 (0.05)  | only in LH |
| <b>PIP</b>          | prolactin-induced protein                                                | 5304   | A_23_P8702    | -1.47 ± 1.86 (0.94) | -0.16 ± 1.57 (0.08) | only in LH |
| <b>SERPINB3</b>     | serpin peptidase inhibitor, clade B (ovalbumin), member 3                | 6317   | A_23_P55632   | -1.47 ± 1.53 (1.23) | -0.43 ± 1.29 (0.30) | only in LH |
| <b>TXLNGY</b>       | taxilin gamma pseudogene, Y-linked                                       |        | A_23_P96658   | 1.47 ± 1.20 (1.74)  | -0.28 ± 1.01 (0.24) | only in LH |
| <b>TRIM49</b>       | tripartite motif containing 49                                           | 57093  | A_23_P1575    | 1.46 ± 1.30 (1.53)  | 0.05 ± 1.10 (0.03)  | only in LH |
| <b>HAMP</b>         | hepcidin antimicrobial peptide                                           | 57817  | A_33_P3336720 | -1.44 ± 0.94 (2.39) | 0.24 ± 0.79 (0.26)  | only in LH |
| <b>SP2-AS1</b>      | SP2 antisense RNA 1                                                      |        | A_21_P0014351 | -1.44 ± 0.68 (3.69) | -0.04 ± 0.58 (0.06) | only in LH |
| <b>SLC6A4</b>       | solute carrier family 6 (neurotransmitter transporter), member 4         | 6532   | A_23_P152995  | 1.43 ± 2.52 (0.59)  | 0.16 ± 2.13 (0.06)  | only in LH |
| <b>S100A2</b>       | S100 calcium binding protein A2                                          | 6273   | A_33_P3376249 | -1.43 ± 2.35 (0.66) | 0.31 ± 1.98 (0.13)  | only in LH |
| <b>SMR3A</b>        | submaxillary gland androgen regulated protein 3A                         | 26952  | A_23_P41365   | -1.43 ± 1.21 (1.66) | -0.21 ± 1.02 (0.17) | only in LH |
| <b>GPA33</b>        | glycoprotein A33 (transmembrane)                                         | 10223  | A_24_P319374  | 1.43 ± 1.16 (1.76)  | 0.11 ± 0.98 (0.09)  | only in LH |
| <b>RBP2</b>         | retinol binding protein 2, cellular                                      | 5948   | A_23_P80491   | 1.43 ± 0.90 (2.51)  | -0.06 ± 0.79 (0.06) | only in LH |
| <b>MMP10</b>        | matrix metalloproteinase 10 (stromelysin 2)                              | 4319   | A_23_P13094   | -1.42 ± 2.05 (0.78) | -0.25 ± 1.73 (0.11) | only in LH |
| <b>HAS1</b>         | hyaluronan synthase 1                                                    | 3036   | A_33_P3295203 | -1.42 ± 1.39 (1.35) | 0.31 ± 1.17 (0.22)  | only in LH |
| <b>SPP1</b>         | secreted phosphoprotein 1                                                | 6696   | A_23_P7313    | -1.41 ± 2.58 (0.57) | -0.10 ± 2.18 (0.03) | only in LH |
| <b>PRB3</b>         | proline-rich protein BstNI subfamily 3                                   | 5544   | A_23_P116890  | -1.41 ± 1.49 (1.21) | -0.02 ± 1.26 (0.01) | only in LH |
| <b>ATP12A</b>       | ATPase, H+/K+ transporting, nongastric, alpha polypeptide                | 479    | A_23_P87982   | -1.41 ± 1.35 (1.38) | -0.23 ± 1.14 (0.17) | only in LH |
| <b>DPCR1</b>        | diffuse panbronchiolitis critical region 1                               | 135656 | A_23_P122508  | 1.41 ± 1.28 (1.49)  | 0.32 ± 1.09 (0.26)  | only in LH |
| <b>RORC</b>         | RAR-related orphan receptor C                                            | 6097   | A_33_P3386671 | 1.41 ± 0.90 (2.45)  | -0.05 ± 0.76 (0.05) | only in LH |
| <b>NPTX1</b>        | neuronal pentraxin I                                                     | 4884   | A_23_P124905  | -0.79 ± 2.23 (0.32) | 3.60 ± 1.88 (3.23)  | only in FB |
| <b>SLC14A1</b>      | solute carrier family 14 (urea transporter), member 1 (Kidd blood group) | 6563   | A_23_P55616   | 0.90 ± 1.74 (0.52)  | 2.93 ± 1.47 (3.42)  | only in FB |
| <b>SULF2</b>        | sulfatase 2                                                              | 55959  | A_23_P154605  | -0.78 ± 1.67 (0.46) | -2.58 ± 1.41 (3.03) | only in FB |
| <b>HLA-DMB</b>      | major histocompatibility complex, class II, DM                           | 3109   | A_32_P351968  | -0.03 ± 1.36 (0.02) | 2.36 ± 1.15 (3.56)  | only in FB |

|                  |                                                                      |       |               |                     |                     |            |
|------------------|----------------------------------------------------------------------|-------|---------------|---------------------|---------------------|------------|
|                  | beta                                                                 |       |               |                     |                     |            |
| <b>HOXC8</b>     | homeobox C8                                                          | 3224  | A_24_P124558  | -0.52 ± 1.25 (0.40) | -2.35 ± 1.05 (3.98) | only in FB |
| <b>CFI</b>       | complement factor I                                                  | 3426  | A_23_P7212    | 0.12 ± 1.87 (0.05)  | -2.29 ± 1.58 (2.20) | only in FB |
| <b>CCL18</b>     | chemokine (C-C motif) ligand 18 (pulmonary and activation-regulated) | 6362  | A_23_P55270   | -0.32 ± 2.91 (0.09) | 2.17 ± 2.46 (1.09)  | only in FB |
| <b>MYH2</b>      | myosin, heavy chain 2, skeletal muscle, adult                        | 4620  | A_23_P38271   | 0.25 ± 2.20 (0.09)  | -2.13 ± 1.93 (1.49) | only in FB |
| <b>HOXC9</b>     | homeobox C9                                                          | 3225  | A_23_P25150   | -0.04 ± 1.55 (0.02) | -2.09 ± 1.31 (2.53) | only in FB |
| <b>FOXQ1</b>     | forkhead box Q1                                                      | 94234 | A_32_P164246  | 0.21 ± 2.00 (0.08)  | 2.08 ± 1.69 (1.75)  | only in FB |
| <b>AGT</b>       | angiotensinogen (serpin peptidase inhibitor, clade A, member 8)      | 183   | A_23_P115261  | -0.89 ± 2.11 (0.41) | -1.99 ± 1.79 (1.52) | only in FB |
| <b>PTGIS</b>     | prostaglandin I2 (prostacyclin) synthase                             | 5740  | A_24_P48723   | -0.53 ± 1.58 (0.30) | -1.96 ± 1.34 (2.24) | only in FB |
| <b>FRAS1</b>     | Fraser extracellular matrix complex subunit 1                        | 80144 | A_32_P107876  | 0.70 ± 1.56 (0.44)  | -1.96 ± 1.32 (2.27) | only in FB |
| <b>SFRP4</b>     | secreted frizzled-related protein 4                                  | 6424  | A_21_P0011967 | -0.10 ± 1.54 (0.05) | -1.96 ± 1.30 (2.33) | only in FB |
| <b>POSTN</b>     | periostin, osteoblast specific factor                                | 10631 | A_33_P3511265 | -0.46 ± 2.11 (0.18) | -1.93 ± 1.78 (1.46) | only in FB |
| <b>SULF1</b>     | sulfatase 1                                                          | 23213 | A_23_P43164   | -0.79 ± 1.72 (0.45) | -1.91 ± 1.45 (1.92) | only in FB |
| <b>SGCG</b>      | sarcoglycan, gamma (35kDa dystrophin-associated glycoprotein)        | 6445  | A_23_P423237  | 0.50 ± 1.71 (0.26)  | -1.91 ± 1.44 (1.93) | only in FB |
| <b>KCND2</b>     | potassium channel, voltage gated Shal related subfamily D, member 2  | 3751  | A_23_P259251  | -0.08 ± 1.23 (0.05) | -1.91 ± 1.04 (3.08) | only in FB |
| <b>CPZ</b>       | carboxypeptidase Z                                                   | 8532  | A_23_P58251   | 0.65 ± 1.59 (0.39)  | -1.86 ± 1.34 (2.07) | only in FB |
| <b>LPXN</b>      | leupaxin                                                             | 9404  | A_23_P87150   | 0.13 ± 1.16 (0.09)  | 1.86 ± 0.98 (3.21)  | only in FB |
| <b>FBLN2</b>     | fibulin 2                                                            | 2199  | A_23_P143981  | -0.26 ± 1.41 (0.15) | -1.85 ± 1.19 (2.41) | only in FB |
| <b>BEX2</b>      | brain expressed X-linked 2                                           | 84707 | A_33_P3245178 | -0.05 ± 1.37 (0.02) | -1.85 ± 1.16 (2.52) | only in FB |
| <b>ITIH3</b>     | inter-alpha-trypsin inhibitor heavy chain 3                          | 3699  | A_33_P3313145 | 0.53 ± 0.92 (0.61)  | -1.83 ± 0.78 (4.24) | only in FB |
| <b>SETBP1</b>    | SET binding protein 1                                                | 26040 | A_23_P4551    | 0.20 ± 0.84 (0.20)  | -1.83 ± 0.71 (4.77) | only in FB |
| <b>CFD</b>       | complement factor D (adipsin)                                        | 1675  | A_23_P119562  | 0.10 ± 1.39 (0.05)  | -1.81 ± 1.18 (2.40) | only in FB |
| <b>LOC284561</b> | uncharacterized LOC284561                                            |       | A_33_P3672756 | -0.16 ± 1.33 (0.09) | -1.81 ± 1.12 (2.54) | only in FB |
| <b>GSTM4</b>     | glutathione S-transferase mu 4                                       | 2948  | A_23_P217917  | 0.54 ± 1.15 (0.47)  | 1.81 ± 0.97 (3.13)  | only in FB |
| <b>SPON1</b>     | spondin 1, extracellular matrix protein                              | 10418 | A_32_P133072  | -0.24 ± 1.44 (0.13) | -1.80 ± 1.22 (2.26) | only in FB |
| <b>B3GALT2</b>   | UDP-Gal:betaGlcNAc beta 1,3-galactosyltransferase, polypeptide 2     | 8707  | A_33_P3286958 | 0.33 ± 1.63 (0.17)  | -1.79 ± 1.37 (1.89) | only in FB |

|                  |                                                                                     |           |                |                     |                     |            |
|------------------|-------------------------------------------------------------------------------------|-----------|----------------|---------------------|---------------------|------------|
| <b>CTTNBP2</b>   | cortactin binding protein 2                                                         | 83992     | A_23_P215744   | -0.06 ± 1.29 (0.04) | 1.79 ± 1.09 (2.64)  | only in FB |
| <b>TNFSF4</b>    | tumor necrosis factor (ligand) superfamily, member 4                                | 7292      | A_23_P126836   | -0.48 ± 2.06 (0.20) | -1.78 ± 1.74 (1.35) | only in FB |
| <b>KLHDC7B</b>   | kelch domain containing 7B                                                          | 113730    | A_24_P117410   | 0.30 ± 1.03 (0.26)  | -1.78 ± 0.87 (3.52) | only in FB |
| <b>ABCA6</b>     | ATP-binding cassette, sub-family A (ABC1), member 6                                 | 23460     | A_23_P500400   | -0.02 ± 1.69 (0.01) | -1.77 ± 1.43 (1.77) | only in FB |
| <b>EPB41L4B</b>  | erythrocyte membrane protein band 4.1 like 4B                                       | 54566     | A_23_P216556   | -0.13 ± 1.19 (0.09) | 1.76 ± 1.00 (2.87)  | only in FB |
| <b>PLXDC2</b>    | plexin domain containing 2                                                          | 84898     | A_23_P161424   | 0.01 ± 1.09 (0.01)  | -1.76 ± 0.92 (3.23) | only in FB |
| <b>PKP2</b>      | plakophilin 2                                                                       | 5318      | A_33_P3405728  | -0.56 ± 1.26 (0.43) | -1.75 ± 1.07 (2.62) | only in FB |
| <b>APBB1IP</b>   | amyloid beta (A4) precursor protein-binding, family B, member 1 interacting protein | 54518     | A_23_P401700   | -0.15 ± 1.04 (0.12) | -1.75 ± 0.88 (3.41) | only in FB |
| <b>CCND2</b>     | cyclin D2                                                                           | 894       | A_24_P278747   | 0.46 ± 1.48 (0.28)  | -1.74 ± 1.25 (2.08) | only in FB |
| <b>MEST</b>      | mesoderm specific transcript                                                        |           | A_23_P156970   | -0.36 ± 1.66 (0.18) | -1.72 ± 1.40 (1.73) | only in FB |
| <b>RARRES2</b>   | retinoic acid receptor responder (tazarotene induced) 2                             | 5919      | A_23_P134237   | -0.43 ± 1.83 (0.20) | -1.71 ± 1.55 (1.50) | only in FB |
| <b>FMOD</b>      | fibromodulin                                                                        | 2331      | A_23_P114883   | -0.40 ± 0.93 (0.41) | -1.71 ± 0.79 (3.81) | only in FB |
| <b>ARHGAP26</b>  | Rho GTPase activating protein 26                                                    | 23092     | A_33_P3228305  | -0.20 ± 1.32 (0.12) | -1.69 ± 1.11 (2.35) | only in FB |
| <b>SHC2</b>      | SHC (Src homology 2 domain containing) transforming protein 2                       | 25759     | A_32_P205624   | 0.31 ± 1.19 (0.22)  | -1.69 ± 1.01 (2.69) | only in FB |
| <b>HOXC6</b>     | homeobox C6                                                                         | 3223      | A_33_P3300965  | 0.02 ± 1.62 (0.01)  | -1.62 ± 1.37 (1.65) | only in FB |
| <b>SLC51B</b>    | solute carrier family 51, beta subunit                                              | 123264    | A_23_P436284   | -0.64 ± 1.54 (0.39) | 1.62 ± 1.36 (1.67)  | only in FB |
| <b>KLHL13</b>    | kelch-like family member 13                                                         | 90293     | A_23_P159974   | 0.26 ± 1.04 (0.22)  | 1.62 ± 0.88 (3.09)  | only in FB |
| <b>ALDH1A1</b>   | aldehyde dehydrogenase 1 family, member A1                                          | 216       | A_23_P83098    | 0.39 ± 1.86 (0.17)  | -1.61 ± 1.58 (1.34) | only in FB |
| <b>LINC00312</b> | lincRNA 312                                                                         |           | A_23_P166779   | 0.18 ± 1.06 (0.14)  | -1.61 ± 0.90 (2.98) | only in FB |
| <b>LINC01444</b> | lincRNA 1444                                                                        | 101927642 | A_22_P00012170 | 0.12 ± 1.47 (0.06)  | 1.60 ± 1.24 (1.87)  | only in FB |
| <b>SCG2</b>      | secretogranin II                                                                    | 7857      | A_24_P88696    | 0.08 ± 1.42 (0.04)  | -1.60 ± 1.20 (1.97) | only in FB |
| <b>AKR1C8P</b>   | aldo-keto reductase family 1, member C8, pseudogene                                 | 340811    | A_21_P0010854  | -0.95 ± 1.20 (0.93) | 1.60 ± 1.02 (2.47)  | only in FB |
| <b>LRRD1</b>     | leucine-rich repeats and death domain containing 1                                  | 401387    | A_33_P3420446  | -0.25 ± 2.31 (0.08) | 1.59 ± 1.95 (0.98)  | only in FB |
| <b>KRT18</b>     | keratin 18, type I                                                                  | 3875      | A_32_P151544   | 0.13 ± 2.18 (0.04)  | -1.59 ± 1.84 (1.06) | only in FB |
| <b>TCF7</b>      | transcription factor 7 (T-cell specific, HMG-box)                                   | 6932      | A_23_P7582     | 0.09 ± 0.99 (0.07)  | 1.59 ± 0.88 (2.99)  | only in FB |

|                     |                                                                                               |           |                |                     |                     |            |
|---------------------|-----------------------------------------------------------------------------------------------|-----------|----------------|---------------------|---------------------|------------|
| <b>LAMP3</b>        | lysosomal-associated membrane protein 3                                                       | 27074     | A_23_P29773    | 0.22 ± 1.92 (0.09)  | -1.58 ± 1.62 (1.25) | only in FB |
| <b>C10orf99</b>     | chromosome 10 open reading frame 99                                                           | 387695    | A_33_P3392405  | 0.44 ± 1.73 (0.22)  | -1.58 ± 1.46 (1.46) | only in FB |
| <b>LOC102725254</b> | uncharacterized LOC102725254                                                                  |           | A_22_P00010091 | 0.25 ± 1.15 (0.18)  | 1.58 ± 1.02 (2.42)  | only in FB |
| <b>MIR503HG</b>     | MIR503 host gene (non-protein coding)                                                         | 84848     | A_33_P3402329  | 0.47 ± 1.11 (0.40)  | -1.58 ± 0.94 (2.71) | only in FB |
| <b>CD52</b>         | CD52 molecule                                                                                 | 1043      | A_23_P85800    | 0.19 ± 2.47 (0.06)  | 1.57 ± 2.09 (0.87)  | only in FB |
| <b>GMFG</b>         | glia maturation factor, gamma                                                                 | 9535      | A_23_P208866   | 0.09 ± 0.90 (0.08)  | 1.57 ± 0.76 (3.58)  | only in FB |
| <b>OAS2</b>         | 2'-5'-oligoadenylate synthetase 2, 69/71kDa                                                   | 4939      | A_33_P3225522  | -0.02 ± 0.57 (0.03) | 1.57 ± 0.48 (6.26)  | only in FB |
| <b>GPR133</b>       | G protein-coupled receptor 133                                                                | 283383    | A_23_P415706   | 0.55 ± 1.17 (0.46)  | -1.56 ± 0.99 (2.49) | only in FB |
| <b>LINC01503</b>    | lincRNA 1503                                                                                  | 100506119 | A_19_P00319981 | -0.41 ± 1.09 (0.35) | -1.56 ± 0.92 (2.72) | only in FB |
| <b>NT5E</b>         | 5'-nucleotidase, ecto (CD73)                                                                  | 4907      | A_24_P354715   | -0.21 ± 0.89 (0.21) | 1.56 ± 0.75 (3.62)  | only in FB |
| <b>PTPN3</b>        | protein tyrosine phosphatase, non-receptor type 3                                             | 5774      | A_22_P00025093 | 0.21 ± 0.75 (0.24)  | 1.56 ± 0.64 (4.46)  | only in FB |
| <b>WBSCR27</b>      | Williams Beuren syndrome chromosome region 27                                                 | 155368    | A_23_P381017   | -0.13 ± 1.67 (0.06) | 1.55 ± 1.41 (1.49)  | only in FB |
| <b>FAM20A</b>       | family with sequence similarity 20, member A                                                  | 54757     | A_32_P108254   | 0.02 ± 1.32 (0.01)  | -1.55 ± 1.16 (1.96) | only in FB |
| <b>PKIB</b>         | protein kinase (cAMP-dependent, catalytic) inhibitor beta                                     | 5570      | A_23_P145529   | -0.15 ± 1.15 (0.10) | -1.54 ± 0.97 (2.50) | only in FB |
| <b>CHI3L1</b>       | chitinase 3-like 1 (cartilage glycoprotein-39)                                                | 1116      | A_23_P137665   | -0.60 ± 1.84 (0.29) | -1.53 ± 1.55 (1.27) | only in FB |
| <b>CREB5</b>        | cAMP responsive element binding protein 5                                                     | 9586      | A_23_P157117   | 0.10 ± 0.98 (0.08)  | 1.52 ± 0.83 (3.06)  | only in FB |
| <b>NDUFA4L2</b>     | NADH dehydrogenase (ubiquinone) 1 alpha subcomplex, 4-like 2                                  | 56901     | A_23_P9614     | 0.55 ± 1.37 (0.38)  | -1.51 ± 1.16 (1.88) | only in FB |
| <b>COL5A1</b>       | collagen, type V, alpha 1                                                                     | 1289      | A_33_P3629678  | -0.46 ± 1.29 (0.33) | -1.51 ± 1.09 (2.07) | only in FB |
| <b>CSTA</b>         | cystatin A (stefin A)                                                                         | 1475      | A_23_P41114    | -0.39 ± 1.13 (0.31) | -1.51 ± 0.99 (2.36) | only in FB |
| <b>LAMP5</b>        | lysosomal-associated membrane protein family, member 5                                        | 24141     | A_23_P40295    | -0.27 ± 2.47 (0.08) | 1.50 ± 2.09 (0.82)  | only in FB |
| <b>IGSF10</b>       | immunoglobulin superfamily, member 10                                                         | 285313    | A_23_P333683   | 0.76 ± 1.45 (0.54)  | -1.50 ± 1.23 (1.72) | only in FB |
| <b>NUAK1</b>        | NUAK family, SNF1-like kinase, 1                                                              | 9891      | A_23_P348257   | -0.25 ± 1.38 (0.15) | -1.50 ± 1.16 (1.87) | only in FB |
| <b>KIF26B</b>       | kinesin family member 26B                                                                     | 55083     | A_33_P3382565  | -0.69 ± 1.26 (0.57) | -1.50 ± 1.07 (2.12) | only in FB |
| <b>SERPINE2</b>     | serpin peptidase inhibitor, clade E (nexin, plasminogen activator inhibitor type 1), member 2 | 5270      | A_23_P50919    | -0.72 ± 1.55 (0.45) | -1.49 ± 1.31 (1.56) | only in FB |
| <b>LIPG</b>         | lipase, endothelial                                                                           | 9388      | A_24_P125469   | -0.44 ± 1.17 (0.35) | -1.49 ± 1.03 (2.18) | only in FB |
| <b>CLIC6</b>        | chloride intracellular channel 6                                                              | 54102     | A_23_P385067   | 0.12 ± 1.18 (0.08)  | 1.49 ± 1.00 (2.31)  | only in FB |

|                   |                                                                      |           |               |                     |                     |            |
|-------------------|----------------------------------------------------------------------|-----------|---------------|---------------------|---------------------|------------|
| <b>PCOLCE2</b>    | procollagen C-endopeptidase enhancer 2                               | 26577     | A_23_P57709   | -0.01 ± 1.70 (0.01) | 1.48 ± 1.43 (1.35)  | only in FB |
| <b>KRT83</b>      | keratin 83, type II                                                  | 3889      | A_33_P3273552 | 0.48 ± 1.54 (0.28)  | -1.48 ± 1.30 (1.55) | only in FB |
| <b>MGP</b>        | matrix Gla protein                                                   | 4256      | A_33_P3361636 | 0.16 ± 1.26 (0.10)  | -1.48 ± 1.06 (2.08) | only in FB |
| <b>CCDC80</b>     | coiled-coil domain containing 80                                     | 151887    | A_23_P58082   | -0.64 ± 1.00 (0.70) | -1.48 ± 0.85 (2.86) | only in FB |
| <b>SLC37A2</b>    | solute carrier family 37 (glucose-6-phosphate transporter), member 2 | 219855    | A_33_P3474319 | -0.34 ± 0.87 (0.37) | 1.48 ± 0.73 (3.49)  | only in FB |
| <b>FOSB</b>       | FBJ murine osteosarcoma viral oncogene homolog B                     | 2354      | A_23_P429998  | -0.21 ± 1.69 (0.10) | 1.47 ± 1.43 (1.36)  | only in FB |
| <b>TPD52L1</b>    | tumor protein D52-like 1                                             | 7164      | A_23_P31143   | -0.38 ± 1.38 (0.24) | -1.47 ± 1.16 (1.82) | only in FB |
| <b>GPM6B</b>      | glycoprotein M6B                                                     | 2824      | A_23_P378416  | 0.50 ± 1.35 (0.35)  | 1.47 ± 1.14 (1.86)  | only in FB |
| <b>DHRS3</b>      | dehydrogenase/reductase (SDR family) member 3                        | 9249      | A_23_P33759   | 0.21 ± 1.12 (0.16)  | -1.47 ± 0.99 (2.30) | only in FB |
| <b>FAM64A</b>     | family with sequence similarity 64, member A                         | 54478     | A_33_P3276918 | -0.83 ± 1.04 (0.95) | 1.47 ± 0.88 (2.68)  | only in FB |
| <b>SUSD3</b>      | sushi domain containing 3                                            | 203328    | A_23_P401076  | -0.28 ± 1.04 (0.24) | 1.47 ± 0.88 (2.67)  | only in FB |
| <b>CDKN2A-AS1</b> | CDKN2A antisense RNA 1 (head to head)                                |           | A_23_P307502  | -0.03 ± 0.92 (0.02) | -1.47 ± 0.78 (3.18) | only in FB |
| <b>KRT18P55</b>   | keratin 18 pseudogene 55                                             | 284085    | A_23_P373708  | 0.11 ± 2.44 (0.03)  | -1.46 ± 2.06 (0.80) | only in FB |
| <b>PRSS36</b>     | protease, serine, 36                                                 | 146547    | A_24_P412734  | 0.24 ± 2.23 (0.08)  | 1.46 ± 1.89 (0.91)  | only in FB |
| <b>CACNG7</b>     | calcium channel, voltage-dependent, gamma subunit 7                  | 59284     | A_24_P365349  | -0.02 ± 2.14 (0.01) | -1.46 ± 1.81 (0.96) | only in FB |
| <b>ITGA11</b>     | integrin, alpha 11                                                   | 22801     | A_23_P206022  | 0.61 ± 1.89 (0.29)  | -1.46 ± 1.60 (1.14) | only in FB |
| <b>FBLN1</b>      | fibulin 1                                                            | 2192      | A_23_P211631  | -0.12 ± 1.35 (0.07) | -1.46 ± 1.14 (1.84) | only in FB |
| <b>CDC25C</b>     | cell division cycle 25C                                              | 995       | A_23_P70249   | -0.60 ± 1.33 (0.44) | 1.46 ± 1.12 (1.90)  | only in FB |
| <b>ISLR</b>       | immunoglobulin superfamily containing leucine-rich repeat            | 3671      | A_23_P3312    | -0.26 ± 1.20 (0.18) | -1.46 ± 1.02 (2.18) | only in FB |
| <b>KIF20A</b>     | kinesin family member 20A                                            | 10112     | A_23_P256956  | -0.74 ± 1.02 (0.84) | 1.46 ± 0.86 (2.75)  | only in FB |
| <b>MAOB</b>       | monoamine oxidase B                                                  | 4129      | A_23_P85015   | 0.50 ± 0.96 (0.54)  | 1.46 ± 0.81 (2.97)  | only in FB |
| <b>MMP3</b>       | matrix metalloproteinase 3 (stromelysin 1, progelatinase)            | 4314      | A_23_P161698  | -0.90 ± 2.12 (0.41) | 1.45 ± 1.80 (0.96)  | only in FB |
| <b>COL3A1</b>     | collagen, type III, alpha 1                                          | 1281      | A_24_P935491  | -0.33 ± 1.49 (0.19) | -1.45 ± 1.26 (1.60) | only in FB |
| <b>EYA2</b>       | EYA transcriptional coactivator and phosphatase 2                    | 2139      | A_23_P319859  | -0.57 ± 1.46 (0.36) | 1.45 ± 1.23 (1.63)  | only in FB |
| <b>CPE</b>        | carboxypeptidase E                                                   | 1363      | A_23_P259442  | -0.13 ± 1.40 (0.07) | -1.45 ± 1.18 (1.75) | only in FB |
| <b>GACAT2</b>     | gastric cancer associated transcript 2 (non-protein coding)          | 100287082 | A_21_P0014365 | -0.37 ± 0.99 (0.34) | 1.45 ± 0.84 (2.82)  | only in FB |



|                  |                                                             |        |               |                     |                     |            |
|------------------|-------------------------------------------------------------|--------|---------------|---------------------|---------------------|------------|
| <b>DSP</b>       | desmoplakin                                                 | 1832   | A_32_P157945  | -0.15 ± 2.20 (0.05) | -1.44 ± 1.86 (0.90) | only in FB |
| <b>SLIT3</b>     | slit homolog 3 (Drosophila)                                 | 6586   | A_23_P58588   | -0.13 ± 1.08 (0.09) | -1.44 ± 0.91 (2.48) | only in FB |
| <b>S100A3</b>    | S100 calcium binding protein A3                             | 6274   | A_23_P104073  | 0.53 ± 0.95 (0.59)  | 1.43 ± 0.80 (2.95)  | only in FB |
| <b>KRTAP19-2</b> | keratin associated protein 19-2                             | 337969 | A_33_P3311267 | -0.12 ± 2.22 (0.04) | 1.42 ± 1.87 (0.88)  | only in FB |
| <b>SOX11</b>     | SRY (sex determining region Y)-box 11                       | 6664   | A_24_P302584  | 0.49 ± 1.43 (0.31)  | 1.42 ± 1.21 (1.64)  | only in FB |
| <b>NCAM2</b>     | neural cell adhesion molecule 2                             | 4685   | A_33_P3239884 | 0.95 ± 1.42 (0.75)  | -1.42 ± 1.20 (1.65) | only in FB |
| <b>ADM2</b>      | adrenomedullin 2                                            | 79924  | A_33_P3413905 | -0.82 ± 1.32 (0.67) | -1.42 ± 1.12 (1.84) | only in FB |
| <b>ADAMTS10</b>  | ADAM metalloproteinase with thrombospondin type 1 motif, 10 | 81794  | A_33_P3223056 | -0.10 ± 1.10 (0.07) | -1.42 ± 0.93 (2.35) | only in FB |
| <b>THAP10</b>    | THAP domain containing 10                                   | 56906  | A_23_P106391  | 0.77 ± 1.05 (0.84)  | 1.42 ± 0.89 (2.53)  | only in FB |
| <b>ERICH2</b>    | glutamate-rich 2                                            |        | A_32_P197340  | 0.37 ± 1.54 (0.20)  | -1.41 ± 1.31 (1.45) | only in FB |
| <b>AEBP1</b>     | AE binding protein 1                                        | 165    | A_23_P157299  | 0.01 ± 1.07 (0.01)  | -1.41 ± 0.90 (2.45) | only in FB |
| <b>TSPO2</b>     | translocator protein 2                                      | 222642 | A_33_P3234222 | -0.91 ± 1.03 (1.10) | -1.41 ± 0.87 (2.59) | only in FB |

**Supplementary Table S2.** Annotated genes regulated in the lung homogenate samples after pirfenidone treatment.

| GENE_SYMBOL   | GENE_NAME                                                    | ENTREZ_ID | SPOT_ID        | mean log2(fold-change) ± the half width of the 95% confidence interval | -log10(P-value) |
|---------------|--------------------------------------------------------------|-----------|----------------|------------------------------------------------------------------------|-----------------|
| <b>BPIFA1</b> | BPI fold containing family A, member 1                       | 51297     | A_33_P3245228  | -3.98 ± 2.35                                                           | 2.74            |
| <b>XIST</b>   | X inactive specific transcript (non-protein coding)          | 7503      | A_19_P00323692 | -3.80 ± 4.03                                                           | 1.20            |
| <b>SAA1</b>   | serum amyloid A1                                             | 6288      | A_24_P335092   | -3.72 ± 2.35                                                           | 2.49            |
| <b>RPS4Y1</b> | ribosomal protein S4, Y-linked 1                             | 6192      | A_23_P259314   | 3.57 ± 4.92                                                            | 0.83            |
| <b>SAA2</b>   | serum amyloid A2                                             | 6289      | A_33_P3408918  | -3.49 ± 2.21                                                           | 2.49            |
| <b>RPS4Y2</b> | ribosomal protein S4, Y-linked 2                             | 140032    | A_23_P324384   | 3.37 ± 4.88                                                            | 0.78            |
| <b>CXCL6</b>  | chemokine (C-X-C motif) ligand 6                             | 6372      | A_23_P155755   | -2.59 ± 1.46                                                           | 2.91            |
| <b>DEFB4A</b> | defensin, beta 4A                                            | 1673      | A_23_P157628   | -2.52 ± 1.66                                                           | 2.35            |
| <b>RTKN2</b>  | rhotekin 2                                                   | 219790    | A_24_P13041    | 2.51 ± 1.51                                                            | 2.66            |
| <b>TTY15</b>  | testis-specific transcript, Y-linked 15 (non-protein coding) | 64595     | A_21_P0006594  | 2.49 ± 2.72                                                            | 1.15            |

|                  |                                                                                     |        |               |              |      |
|------------------|-------------------------------------------------------------------------------------|--------|---------------|--------------|------|
| <b>SAA4</b>      | serum amyloid A4, constitutive                                                      | 6291   | A_23_P87238   | -2.46 ± 1.55 | 2.50 |
| <b>PI15</b>      | peptidase inhibitor 15                                                              | 51050  | A_33_P3254096 | -2.45 ± 1.71 | 2.17 |
| <b>SERPINA3</b>  | serpin peptidase inhibitor, clade A (alpha-1 antiproteinase, antitrypsin), member 3 | 12     | A_33_P3399788 | -2.39 ± 1.60 | 2.30 |
| <b>DDX3Y</b>     | DEAD (Asp-Glu-Ala-Asp) box helicase 3, Y-linked                                     | 8653   | A_33_P3224331 | 2.17 ± 2.99  | 0.83 |
| <b>TNFRSF17</b>  | tumor necrosis factor receptor superfamily, member 17                               | 608    | A_23_P37736   | -2.16 ± 0.79 | 5.14 |
| <b>KDM5D</b>     | lysine (K)-specific demethylase 5D                                                  | 8284   | A_23_P137238  | 2.14 ± 2.04  | 1.40 |
| <b>USP9Y</b>     | ubiquitin specific peptidase 9, Y-linked                                            | 8287   | A_33_P3217700 | 2.12 ± 2.48  | 1.04 |
| <b>SERPIND1</b>  | serpin peptidase inhibitor, clade D (heparin cofactor), member 1                    | 3053   | A_33_P3241511 | 2.12 ± 1.42  | 2.30 |
| <b>CLDN18</b>    | claudin 18                                                                          | 51208  | A_33_P3240752 | 2.09 ± 2.92  | 0.82 |
| <b>MT1H</b>      | metallothionein 1H                                                                  | 4496   | A_33_P3368313 | -2.03 ± 1.34 | 2.34 |
| <b>LCN2</b>      | lipocalin 2                                                                         | 3934   | A_23_P169437  | -2.02 ± 1.23 | 2.62 |
| <b>HIST1H2AI</b> | histone cluster 1, H2ai                                                             | 8329   | A_33_P3360216 | -1.98 ± 1.15 | 2.82 |
| <b>MZB1</b>      | marginal zone B and B1 cell-specific protein                                        | 51237  | A_23_P84596   | -1.94 ± 0.94 | 3.59 |
| <b>KRT5</b>      | keratin 5, type II                                                                  | 3852   | A_23_P218047  | -1.93 ± 2.47 | 0.92 |
| <b>ACSM1</b>     | acyl-CoA synthetase medium-chain family member 1                                    | 116285 | A_23_P106933  | 1.89 ± 0.61  | 5.90 |
| <b>FCRL5</b>     | Fc receptor-like 5                                                                  | 83416  | A_23_P201211  | -1.88 ± 0.65 | 5.50 |
| <b>MMP1</b>      | matrix metalloproteinase 1 (interstitial collagenase)                               | 4312   | A_23_P1691    | -1.87 ± 2.58 | 0.83 |
| <b>BPIFB1</b>    | BPI fold containing family B, member 1                                              | 92747  | A_23_P154784  | -1.87 ± 1.92 | 1.25 |
| <b>IRF5</b>      | interferon regulatory factor 5                                                      | 3663   | A_23_P500271  | -1.87 ± 1.43 | 1.91 |
| <b>C4BPA</b>     | complement component 4 binding protein, alpha                                       | 722    | A_23_P97541   | 1.87 ± 1.05  | 2.95 |
| <b>MUC5B</b>     | mucin 5B, oligomeric mucus/gel-forming                                              | 727897 | A_24_P102650  | -1.84 ± 1.47 | 1.79 |
| <b>PRB4</b>      | proline-rich protein BstNI subfamily 4                                              | 5545   | A_33_P3216150 | -1.82 ± 1.85 | 1.26 |
| <b>GDF10</b>     | growth differentiation factor 10                                                    | 2662   | A_23_P52227   | 1.80 ± 2.29  | 0.93 |
| <b>KLK12</b>     | kallikrein-related peptidase 12                                                     | 43849  | A_23_P500010  | -1.79 ± 1.93 | 1.17 |
| <b>C4BPB</b>     | complement component 4 binding protein, beta                                        | 725    | A_23_P319598  | 1.77 ± 0.86  | 3.54 |
| <b>IL1R2</b>     | interleukin 1 receptor, type II                                                     | 7850   | A_24_P63019   | -1.74 ± 1.10 | 2.48 |
| <b>KRT6A</b>     | keratin 6A, type II                                                                 | 3853   | A_33_P3292886 | -1.73 ± 3.34 | 0.53 |

|                     |                                                                                        |           |                |              |      |
|---------------------|----------------------------------------------------------------------------------------|-----------|----------------|--------------|------|
| <b>CLIC3</b>        | chloride intracellular channel 3                                                       | 9022      | A_33_P3336686  | 1.73 ± 1.66  | 1.39 |
| <b>GDF11</b>        | growth differentiation factor 11                                                       | 10220     | A_23_P76102    | -1.73 ± 0.79 | 3.88 |
| <b>BMP4</b>         | bone morphogenetic protein 4                                                           | 652       | A_23_P54144    | 1.72 ± 1.70  | 1.32 |
| <b>ZNF215</b>       | zinc finger protein 215                                                                | 7762      | A_23_P53057    | -1.72 ± 0.75 | 4.09 |
| <b>CA4</b>          | carbonic anhydrase IV                                                                  | 762       | A_23_P4096     | 1.71 ± 1.55  | 1.49 |
| <b>CHRD12</b>       | chordin-like 2                                                                         | 25884     | A_23_P13548    | -1.71 ± 1.20 | 2.15 |
| <b>GREM2</b>        | gremlin 2, DAN family BMP antagonist                                                   | 64388     | A_24_P40626    | 1.70 ± 1.56  | 1.48 |
| <b>SERPINB4</b>     | serpin peptidase inhibitor, clade B (ovalbumin), member 4                              | 6318      | A_23_P502413   | -1.69 ± 1.56 | 1.46 |
| <b>MST1P2</b>       | macrophage stimulating 1 (hepatocyte growth factor-like) pseudogene 2                  |           | A_21_P0010518  | 1.69 ± 0.67  | 4.65 |
| <b>LAX1</b>         | lymphocyte transmembrane adaptor 1                                                     | 54900     | A_23_P438      | -1.68 ± 0.94 | 2.94 |
| <b>ZG16B</b>        | zymogen granule protein 16B                                                            | 124220    | A_23_P118203   | -1.67 ± 1.39 | 1.70 |
| <b>CA3</b>          | carbonic anhydrase III                                                                 | 761       | A_23_P20316    | -1.67 ± 1.12 | 2.27 |
| <b>UCN3</b>         | urocortin 3                                                                            | 114131    | A_33_P3241369  | 1.65 ± 0.88  | 3.14 |
| <b>SOSTDC1</b>      | sclerostin domain containing 1                                                         | 25928     | A_23_P145841   | 1.64 ± 1.72  | 1.22 |
| <b>CHRM1</b>        | cholinergic receptor, muscarinic 1                                                     | 1128      | A_33_P3367860  | 1.64 ± 1.70  | 1.24 |
| <b>SPAG4</b>        | sperm associated antigen 4                                                             | 6676      | A_23_P132027   | -1.64 ± 0.80 | 3.57 |
| <b>PRB2</b>         | proline-rich protein BstNI subfamily 2                                                 | 653247    | A_23_P139434   | -1.63 ± 1.73 | 1.20 |
| <b>CXCL13</b>       | chemokine (C-X-C motif) ligand 13                                                      | 10563     | A_23_P121695   | -1.63 ± 1.29 | 1.83 |
| <b>ZNF300P1</b>     | zinc finger protein 300 pseudogene 1 (functional)                                      |           | A_24_P300302   | 1.63 ± 1.11  | 2.25 |
| <b>CNTN6</b>        | contactin 6                                                                            | 27255     | A_33_P3329378  | 1.63 ± 1.01  | 2.57 |
| <b>TNNT2</b>        | troponin T type 2 (cardiac)                                                            | 7139      | A_23_P34700    | 1.62 ± 1.69  | 1.23 |
| <b>LOC100652999</b> | uncharacterized LOC100652999                                                           | 100652999 | A_22_P00023251 | 1.62 ± 1.07  | 2.32 |
| <b>HPGD</b>         | hydroxyprostaglandin dehydrogenase 15-(NAD)                                            | 3248      | A_24_P71904    | 1.61 ± 1.60  | 1.31 |
| <b>SNAR-F</b>       | small ILF3/NF90-associated RNA F                                                       |           | A_21_P0000492  | 1.61 ± 1.30  | 1.76 |
| <b>FASLG</b>        | Fas ligand (TNF superfamily, member 6)                                                 | 356       | A_23_P369815   | 1.61 ± 0.92  | 2.87 |
| <b>FCRL1</b>        | Fc receptor-like 1                                                                     | 115350    | A_33_P3294504  | -1.61 ± 0.87 | 3.12 |
| <b>MMP9</b>         | matrix metalloproteinase 9 (gelatinase B, 92kDa gelatinase, 92kDa type IV collagenase) | 4318      | A_23_P40174    | -1.60 ± 2.70 | 0.63 |
| <b>KRT6C</b>        | keratin 6C, type II                                                                    | 286887    | A_23_P366936   | -1.60 ± 1.96 | 0.98 |

|                  |                                                                                |           |                |              |      |
|------------------|--------------------------------------------------------------------------------|-----------|----------------|--------------|------|
| <b>AGER</b>      | advanced glycosylation end product-specific receptor                           | 177       | A_23_P93360    | 1.60 ± 1.78  | 1.12 |
| <b>ADAMTS4</b>   | ADAM metalloproteinase with thrombospondin type 1 motif, 4                     | 9507      | A_23_P360754   | -1.60 ± 1.47 | 1.46 |
| <b>CD19</b>      | CD19 molecule                                                                  | 930       | A_23_P113572   | -1.60 ± 1.22 | 1.89 |
| <b>WIF1</b>      | WNT inhibitory factor 1                                                        | 11197     | A_32_P216520   | 1.59 ± 1.71  | 1.18 |
| <b>GAL</b>       | galanin/GMAP prepropeptide                                                     | 51083     | A_23_P374844   | -1.58 ± 1.57 | 1.31 |
| <b>ZBED2</b>     | zinc finger, BED-type containing 2                                             | 79413     | A_23_P113793   | 1.58 ± 1.28  | 1.75 |
| <b>C8B</b>       | complement component 8, beta polypeptide                                       | 732       | A_33_P3423854  | 1.58 ± 1.20  | 1.92 |
| <b>SNAR-H</b>    | small ILF3/NF90-associated RNA H                                               |           | A_21_P0000511  | 1.57 ± 1.40  | 1.52 |
| <b>MED4-AS1</b>  | MED4 antisense RNA 1                                                           | 100873965 | A_22_P00011103 | 1.57 ± 1.21  | 1.88 |
| <b>CADM3-AS1</b> | CADM3 antisense RNA 1                                                          |           | A_33_P3359953  | -1.57 ± 0.77 | 3.51 |
| <b>TCN1</b>      | transcobalamin I (vitamin B12 binding protein, R binder family)                | 6947      | A_23_P64372    | -1.56 ± 1.36 | 1.58 |
| <b>SCTR</b>      | secretin receptor                                                              | 6344      | A_23_P28139    | 1.56 ± 1.16  | 1.98 |
| <b>SLC5A5</b>    | solute carrier family 5 (sodium/iodide cotransporter), member 5                | 6528      | A_23_P101774   | 1.56 ± 0.86  | 3.02 |
| <b>BANCR</b>     | BRAF-activated non-protein coding RNA                                          |           | A_22_P00001400 | 1.56 ± 0.83  | 3.16 |
| <b>CYP2F1</b>    | cytochrome P450, family 2, subfamily F, polypeptide 1                          | 1572      | A_23_P89981    | -1.55 ± 1.65 | 1.19 |
| <b>STC2</b>      | stanniocalcin 2                                                                | 8614      | A_23_P416395   | 1.54 ± 1.01  | 2.37 |
| <b>S100A12</b>   | S100 calcium binding protein A12                                               | 6283      | A_23_P74001    | -1.54 ± 0.99 | 2.43 |
| <b>TPTE2P3</b>   | transmembrane phosphoinositide 3-phosphatase and tensin homolog 2 pseudogene 3 |           | A_32_P48134    | 1.54 ± 0.86  | 2.98 |
| <b>SPC25</b>     | SPC25, NDC80 kinetochore complex component                                     | 57405     | A_23_P51085    | -1.52 ± 1.05 | 2.20 |
| <b>C11orf21</b>  | chromosome 11 open reading frame 21                                            | 29125     | A_33_P3377229  | 1.52 ± 0.79  | 3.27 |
| <b>MIA2</b>      | melanoma inhibitory activity 2                                                 | 117153    | A_23_P117387   | 1.52 ± 0.77  | 3.32 |
| <b>MUCL1</b>     | mucin-like 1                                                                   | 118430    | A_23_P150979   | -1.51 ± 1.77 | 1.04 |
| <b>ECEL1P2</b>   | endothelin converting enzyme-like 1, pseudogene 2                              | 347694    | A_33_P3610406  | 1.51 ± 1.26  | 1.68 |
| <b>ARL14</b>     | ADP-ribosylation factor-like 14                                                | 80117     | A_23_P92161    | 1.51 ± 0.90  | 2.69 |
| <b>RASD1</b>     | RAS, dexamethasone-induced 1                                                   | 51655     | A_23_P118392   | -1.51 ± 0.87 | 2.84 |

|                     |                                                                          |        |                |              |      |
|---------------------|--------------------------------------------------------------------------|--------|----------------|--------------|------|
| <b>LOC101928794</b> | uncharacterized LOC101928794                                             |        | A_21_P0014149  | 1.51 ± 0.71  | 3.72 |
| <b>C12orf80</b>     | chromosome 12 open reading frame 80                                      |        | A_22_P00008937 | -1.51 ± 0.63 | 4.38 |
| <b>NCKAP5</b>       | NCK-associated protein 5                                                 | 344148 | A_23_P360079   | 1.50 ± 1.42  | 1.41 |
| <b>SEPSECS-AS1</b>  | SEPSECS antisense RNA 1 (head to head)                                   |        | A_21_P0000709  | 1.50 ± 0.73  | 3.55 |
| <b>IHH</b>          | indian hedgehog                                                          | 3549   | A_33_P3338698  | 1.49 ± 0.80  | 3.09 |
| <b>ADCYAP1R1</b>    | adenylate cyclase activating polypeptide 1 (pituitary) receptor type I   | 117    | A_23_P157109   | -1.49 ± 0.73 | 3.54 |
| <b>SPRR1B</b>       | small proline-rich protein 1B                                            | 6699   | A_23_P159406   | -1.48 ± 2.00 | 0.85 |
| <b>SNAR-D</b>       | small ILF3/NF90-associated RNA D                                         |        | A_21_P0000508  | 1.48 ± 1.36  | 1.46 |
| <b>SPOCK1</b>       | sparc/osteonectin, cwcv and kazal-like domains proteoglycan (testican) 1 | 6695   | A_24_P354689   | -1.48 ± 1.29 | 1.58 |
| <b>S100P</b>        | S100 calcium binding protein P                                           | 6286   | A_23_P58266    | -1.48 ± 1.23 | 1.70 |
| <b>FPR2</b>         | formyl peptide receptor 2                                                | 2358   | A_23_P55649    | -1.48 ± 1.19 | 1.78 |
| <b>LOC101928152</b> | uncharacterized LOC101928152                                             |        | A_21_P0014466  | -1.48 ± 0.89 | 2.67 |
| <b>CACNA2D1</b>     | calcium channel, voltage-dependent, alpha 2/delta subunit 1              | 781    | A_23_P82379    | -1.48 ± 0.75 | 3.40 |
| <b>PIP</b>          | prolactin-induced protein                                                | 5304   | A_23_P8702     | -1.47 ± 1.86 | 0.94 |
| <b>SERPINB3</b>     | serpin peptidase inhibitor, clade B (ovalbumin), member 3                | 6317   | A_23_P55632    | -1.47 ± 1.53 | 1.23 |
| <b>TCL1A</b>        | T-cell leukemia/lymphoma 1A                                              | 8115   | A_23_P357717   | -1.47 ± 1.20 | 1.74 |
| <b>TXLNGY</b>       | taxilin gamma pseudogene, Y-linked                                       |        | A_23_P96658    | 1.47 ± 1.20  | 1.74 |
| <b>RGS9</b>         | regulator of G-protein signaling 9                                       | 8787   | A_23_P66881    | 1.47 ± 1.18  | 1.78 |
| <b>LINC01436</b>    | lincRNA 1436                                                             |        | A_22_P00019460 | 1.46 ± 1.52  | 1.23 |
| <b>TRIM49</b>       | tripartite motif containing 49                                           | 57093  | A_23_P1575     | 1.46 ± 1.30  | 1.53 |
| <b>TXLNGY</b>       | taxilin gamma pseudogene, Y-linked                                       | 246126 | A_23_P364792   | 1.45 ± 1.48  | 1.26 |
| <b>HJURP</b>        | Holliday junction recognition protein                                    | 55355  | A_33_P3807062  | -1.45 ± 0.98 | 2.27 |
| <b>MEDAG</b>        | mesenteric estrogen-dependent adipogenesis                               | 84935  | A_23_P99515    | -1.44 ± 1.26 | 1.57 |
| <b>HAMP</b>         | hepcidin antimicrobial peptide                                           | 57817  | A_33_P3336720  | -1.44 ± 0.94 | 2.39 |
| <b>SP2-AS1</b>      | SP2 antisense RNA 1                                                      |        | A_21_P0014351  | -1.44 ± 0.68 | 3.69 |
| <b>SLC6A4</b>       | solute carrier family 6 (neurotransmitter transporter), member 4         | 6532   | A_23_P152995   | 1.43 ± 2.52  | 0.59 |
| <b>S100A2</b>       | S100 calcium binding protein A2                                          | 6273   | A_33_P3376249  | -1.43 ± 2.35 | 0.66 |

|                   |                                                                                    |        |               |              |      |
|-------------------|------------------------------------------------------------------------------------|--------|---------------|--------------|------|
| <b>FGFBP1</b>     | fibroblast growth factor binding protein 1                                         | 9982   | A_23_P30126   | -1.43 ± 1.62 | 1.10 |
| <b>SMR3A</b>      | submaxillary gland androgen regulated protein 3A                                   | 26952  | A_23_P41365   | -1.43 ± 1.21 | 1.66 |
| <b>GPA33</b>      | glycoprotein A33 (transmembrane)                                                   | 10223  | A_24_P319374  | 1.43 ± 1.16  | 1.76 |
| <b>ABHD2</b>      | abhydrolase domain containing 2                                                    | 11057  | A_23_P395172  | 1.43 ± 1.15  | 1.77 |
| <b>RBP2</b>       | retinol binding protein 2, cellular                                                | 5948   | A_23_P80491   | 1.43 ± 0.90  | 2.51 |
| <b>MMP10</b>      | matrix metalloproteinase 10 (stromelysin 2)                                        | 4319   | A_23_P13094   | -1.42 ± 2.05 | 0.78 |
| <b>HAS1</b>       | hyaluronan synthase 1                                                              | 3036   | A_33_P3295203 | -1.42 ± 1.39 | 1.35 |
| <b>SPP1</b>       | secreted phosphoprotein 1                                                          | 6696   | A_23_P7313    | -1.41 ± 2.58 | 0.57 |
| <b>PRB3</b>       | proline-rich protein BstNI subfamily 3                                             | 5544   | A_23_P116890  | -1.41 ± 1.49 | 1.21 |
| <b>ATP12A</b>     | ATPase, H <sup>+</sup> /K <sup>+</sup> transporting, nongastric, alpha polypeptide | 479    | A_23_P87982   | -1.41 ± 1.35 | 1.38 |
| <b>SNAR-G2</b>    | small ILF3/NF90-associated RNA G2                                                  |        | A_21_P0000509 | 1.41 ± 1.31  | 1.45 |
| <b>DPCR1</b>      | diffuse panbronchiolitis critical region 1                                         | 135656 | A_23_P122508  | 1.41 ± 1.28  | 1.49 |
| <b>CDKN3</b>      | cyclin-dependent kinase inhibitor 3                                                | 1033   | A_23_P48669   | -1.41 ± 0.96 | 2.25 |
| <b>RORC</b>       | RAR-related orphan receptor C                                                      | 6097   | A_33_P3386671 | 1.41 ± 0.90  | 2.45 |
| <b>HRK</b>        | harakiri, BCL2 interacting protein                                                 | 8739   | A_23_P25194   | -1.40 ± 1.74 | 0.96 |
| <b>LOC285889</b>  | uncharacterized LOC285889                                                          | 285889 | A_21_P0013359 | 1.40 ± 1.25  | 1.53 |
| <b>SRPX2</b>      | sushi-repeat containing protein, X-linked 2                                        | 27286  | A_23_P136978  | -1.40 ± 1.11 | 1.82 |
| <b>ZDHHC11B</b>   | zinc finger, DHHC-type containing 11B                                              |        | A_33_P3345643 | 1.40 ± 1.02  | 2.02 |
| <b>LINC00622</b>  | lincRNA 622                                                                        | 644242 | A_21_P0000663 | 1.40 ± 0.92  | 2.36 |
| <b>ANKRD20A9P</b> | ankyrin repeat domain 20 family, member A9, pseudogene                             |        | A_21_P0012182 | 1.40 ± 0.83  | 2.70 |
| <b>ZNF287</b>     | zinc finger protein 287                                                            | 57336  | A_23_P4416    | 1.40 ± 0.75  | 3.15 |
| <b>SNAR-B2</b>    | small ILF3/NF90-associated RNA B2                                                  |        | A_21_P0000507 | 1.39 ± 1.34  | 1.37 |
| <b>HLA-DRB6</b>   | major histocompatibility complex, class II, DR beta 6 (pseudogene)                 | 3128   | A_24_P169013  | -1.39 ± 1.24 | 1.52 |
| <b>MLC1</b>       | megalencephalic leukoencephalopathy with subcortical cysts 1                       | 23209  | A_23_P211680  | 1.39 ± 1.14  | 1.73 |
| <b>FAM3D</b>      | family with sequence similarity 3, member D                                        | 131177 | A_23_P41145   | -1.39 ± 0.97 | 2.16 |
| <b>GPR39</b>      | G protein-coupled receptor 39                                                      | 2863   | A_23_P79155   | 1.39 ± 0.95  | 2.25 |
| <b>GGACT</b>      | gamma-glutamylamine cyclotransferase                                               | 87769  | A_32_P110872  | -1.39 ± 0.91 | 2.38 |

|                   |                                                                                  |           |                |              |      |
|-------------------|----------------------------------------------------------------------------------|-----------|----------------|--------------|------|
| <b>RAPH1</b>      | Ras association (RalGDS/AF-6) and pleckstrin homology domains 1                  | 65059     | A_33_P3421571  | -1.39 ± 0.89 | 2.45 |
| <b>OR8B8</b>      | olfactory receptor, family 8, subfamily B, member 8                              | 26493     | A_23_P1819     | -1.39 ± 0.58 | 4.34 |
| <b>ITLN2</b>      | intelectin 2                                                                     | 142683    | A_24_P53778    | 1.38 ± 1.77  | 0.92 |
| <b>STRA6</b>      | stimulated by retinoic acid 6                                                    | 64220     | A_33_P3307495  | -1.38 ± 1.56 | 1.10 |
| <b>MS4A6E</b>     | membrane-spanning 4-domains, subfamily A, member 6E                              | 245802    | A_23_P416238   | -1.38 ± 1.20 | 1.59 |
| <b>VPREB3</b>     | pre-B lymphocyte 3                                                               | 29802     | A_33_P3299254  | -1.38 ± 0.94 | 2.25 |
| <b>KCNG1</b>      | potassium channel, voltage gated modifier subfamily G, member 1                  | 3755      | A_22_P00005343 | -1.37 ± 1.26 | 1.47 |
| <b>PTX3</b>       | pentraxin 3, long                                                                | 5806      | A_23_P121064   | -1.37 ± 1.12 | 1.74 |
| <b>MPO</b>        | myeloperoxidase                                                                  | 4353      | A_23_P141173   | -1.37 ± 0.85 | 2.54 |
| <b>MS4A1</b>      | membrane-spanning 4-domains, subfamily A, member 1                               | 931       | A_33_P3406567  | -1.36 ± 1.36 | 1.31 |
| <b>NUDT9P1</b>    | nudix (nucleoside diphosphate linked moiety X)-type motif 9 pseudogene 1         |           | A_32_P40463    | 1.36 ± 0.86  | 2.48 |
| <b>LGALS7</b>     | lectin, galactoside-binding, soluble, 7                                          | 3963      | A_24_P238250   | -1.35 ± 2.05 | 0.73 |
| <b>SPRR2A</b>     | small proline-rich protein 2A                                                    | 6700      | A_33_P3260430  | -1.35 ± 1.22 | 1.50 |
| <b>HNF1A-AS1</b>  | HNF1A antisense RNA 1                                                            | 283460    | A_24_P314515   | 1.35 ± 0.67  | 3.48 |
| <b>MERTK</b>      | MER proto-oncogene, tyrosine kinase                                              | 10461     | A_33_P3402091  | -1.35 ± 0.64 | 3.71 |
| <b>CCL7</b>       | chemokine (C-C motif) ligand 7                                                   | 6354      | A_23_P78037    | -1.34 ± 1.84 | 0.84 |
| <b>GALNT14</b>    | polypeptide N-acetylgalactosaminyltransferase 14                                 | 79623     | A_23_P67847    | -1.34 ± 1.77 | 0.88 |
| <b>SERPINB5</b>   | serpin peptidase inhibitor, clade B (ovalbumin), member 5                        | 5268      | A_33_P3310104  | -1.34 ± 1.74 | 0.91 |
| <b>HIST1H2AG</b>  | histone cluster 1, H2ag                                                          | 8969      | A_21_P0000197  | -1.34 ± 1.29 | 1.38 |
| <b>PROK2</b>      | prokineticin 2                                                                   | 60675     | A_24_P97342    | -1.34 ± 1.04 | 1.85 |
| <b>FBN3</b>       | fibrillin 3                                                                      | 84467     | A_33_P3300430  | 1.34 ± 0.81  | 2.64 |
| <b>PLA2G7</b>     | phospholipase A2, group VII (platelet-activating factor acetylhydrolase, plasma) | 7941      | A_23_P145096   | -1.33 ± 1.66 | 0.95 |
| <b>HMMR</b>       | hyaluronan-mediated motility receptor (RHAMM)                                    | 3161      | A_23_P70007    | -1.33 ± 0.97 | 2.05 |
| <b>LMO7DN-IT1</b> | LMO7DN intronic transcript 1                                                     | 104326189 | A_22_P00023866 | 1.33 ± 0.89  | 2.30 |
| <b>ASB18</b>      | ankyrin repeat and SOCS box containing 18                                        | 401036    | A_33_P3290162  | -1.33 ± 0.88 | 2.35 |



|                     |                                                                     |           |                |              |      |
|---------------------|---------------------------------------------------------------------|-----------|----------------|--------------|------|
| <b>GPR128</b>       | G protein-coupled receptor 128                                      | 84873     | A_23_P40919    | 1.32 ± 2.23  | 0.63 |
| <b>CCDC85A</b>      | coiled-coil domain containing 85A                                   | 114800    | A_23_P349566   | 1.32 ± 1.73  | 0.89 |
| <b>SPRR2E</b>       | small proline-rich protein 2E                                       | 6704      | A_33_P3325704  | -1.32 ± 1.35 | 1.26 |
| <b>MS4A15</b>       | membrane-spanning 4-domains, subfamily A, member 15                 | 219995    | A_33_P3312499  | 1.32 ± 1.16  | 1.57 |
| <b>CHI3L2</b>       | chitinase 3-like 2                                                  | 1117      | A_23_P12082    | -1.32 ± 1.13 | 1.62 |
| <b>CD7</b>          | CD7 molecule                                                        | 924       | A_33_P3226995  | 1.32 ± 0.89  | 2.28 |
| <b>AIM2</b>         | absent in melanoma 2                                                | 9447      | A_32_P44394    | -1.32 ± 0.75 | 2.88 |
| <b>EPB41L5</b>      | erythrocyte membrane protein band 4.1 like 5                        | 57669     | A_24_P944640   | 1.32 ± 0.57  | 4.15 |
| <b>DEFA3</b>        | defensin, alpha 3, neutrophil-specific                              | 1667      | A_23_P31816    | -1.31 ± 1.78 | 0.85 |
| <b>MT1G</b>         | metallothionein 1G                                                  | 4495      | A_33_P3233645  | -1.31 ± 1.41 | 1.18 |
| <b>SP5</b>          | Sp5 transcription factor                                            | 389058    | A_23_P135381   | 1.31 ± 1.15  | 1.56 |
| <b>ZDHHC11</b>      | zinc finger, DHHC-type containing 11                                | 79844     | A_33_P3344204  | 1.31 ± 1.09  | 1.70 |
| <b>CYS1</b>         | cystin 1                                                            | 192668    | A_33_P3398156  | 1.31 ± 0.96  | 2.01 |
| <b>NR1D1</b>        | nuclear receptor subfamily 1, group D, member 1                     | 9572      | A_24_P250227   | -1.31 ± 0.93 | 2.11 |
| <b>PNOC</b>         | prepronociceptin                                                    | 5368      | A_23_P253321   | -1.31 ± 0.93 | 2.11 |
| <b>CYTL1</b>        | cytokine-like 1                                                     | 54360     | A_23_P10647    | -1.31 ± 0.90 | 2.23 |
| <b>CXCR4</b>        | chemokine (C-X-C motif) receptor 4                                  | 7852      | A_23_P102000   | -1.31 ± 0.82 | 2.50 |
| <b>SIGLEC5</b>      | sialic acid binding Ig-like lectin 5                                | 8778      | A_24_P48539    | -1.31 ± 0.80 | 2.60 |
| <b>LINC01500</b>    | lincRNA 1500                                                        | 102723742 | A_22_P00004890 | -1.31 ± 0.77 | 2.78 |
| <b>SCN3A</b>        | sodium channel, voltage gated, type III alpha subunit               | 6328      | A_23_P67896    | 1.31 ± 0.76  | 2.79 |
| <b>KHDRBS2</b>      | KH domain containing, RNA binding, signal transduction associated 2 | 202559    | A_23_P366453   | 1.30 ± 0.98  | 1.96 |
| <b>GXYLT1P3</b>     | glucoside xylosyltransferase 1 pseudogene 3                         |           | A_33_P3244369  | 1.30 ± 0.94  | 2.06 |
| <b>TIMP4</b>        | TIMP metalloproteinase inhibitor 4                                  | 7079      | A_32_P70315    | -1.30 ± 0.88 | 2.27 |
| <b>CCR10</b>        | chemokine (C-C motif) receptor 10                                   | 2826      | A_33_P3221303  | -1.30 ± 0.72 | 3.01 |
| <b>OLFM4</b>        | olfactomedin 4                                                      | 10562     | A_24_P181254   | -1.29 ± 1.47 | 1.08 |
| <b>COL4A3</b>       | collagen, type IV, alpha 3 (Goodpasture antigen)                    | 1285      | A_23_P170679   | 1.29 ± 1.18  | 1.48 |
| <b>LOC100240735</b> | uncharacterized LOC100240735                                        | 100240735 | A_32_P170481   | 1.29 ± 1.16  | 1.51 |
| <b>EFCC1</b>        | EF-hand and coiled-coil domain containing 1                         | 79825     | A_23_P166566   | 1.29 ± 1.15  | 1.54 |

|                     |                                                                                             |           |                |              |      |
|---------------------|---------------------------------------------------------------------------------------------|-----------|----------------|--------------|------|
| <b>PLA2G2A</b>      | phospholipase A2, group IIA (platelets, synovial fluid)                                     | 5320      | A_23_P321949   | -1.29 ± 1.13 | 1.57 |
| <b>SLC41A2</b>      | solute carrier family 41 (magnesium transporter), member 2                                  | 84102     | A_23_P204801   | -1.29 ± 0.95 | 2.01 |
| <b>TAL1</b>         | T-cell acute lymphocytic leukemia 1                                                         | 6886      | A_23_P63371    | 1.29 ± 0.95  | 2.01 |
| <b>PI3</b>          | peptidase inhibitor 3, skin-derived                                                         | 5266      | A_23_P210465   | -1.29 ± 0.93 | 2.07 |
| <b>LOC283710</b>    | uncharacterized LOC283710                                                                   |           | A_33_P3336587  | -1.29 ± 0.88 | 2.22 |
| <b>AQP4</b>         | aquaporin 4                                                                                 | 361       | A_33_P3420757  | 1.29 ± 0.86  | 2.30 |
| <b>ZNF184</b>       | zinc finger protein 184                                                                     | 7738      | A_23_P156620   | 1.29 ± 0.60  | 3.81 |
| <b>NRXN3</b>        | neurexin 3                                                                                  | 9369      | A_33_P3851023  | 1.28 ± 1.76  | 0.84 |
| <b>PRB1</b>         | proline-rich protein BstNI subfamily 1                                                      | 5542      | A_33_P3258593  | -1.28 ± 1.48 | 1.06 |
| <b>ANXA3</b>        | annexin A3                                                                                  | 306       | A_23_P121716   | 1.28 ± 1.20  | 1.43 |
| <b>ANLN</b>         | anillin, actin binding protein                                                              | 54443     | A_23_P356684   | -1.28 ± 1.15 | 1.52 |
| <b>LOC90246</b>     | uncharacterized LOC90246                                                                    |           | A_24_P532180   | 1.28 ± 1.12  | 1.57 |
| <b>ARHGEF26</b>     | Rho guanine nucleotide exchange factor (GEF) 26                                             | 26084     | A_32_P5276     | 1.28 ± 1.11  | 1.60 |
| <b>FKBP5</b>        | FK506 binding protein 5                                                                     | 2289      | A_24_P38081    | -1.28 ± 1.07 | 1.68 |
| <b>LOC101927542</b> | uncharacterized LOC101927542                                                                |           | A_21_P0013388  | 1.28 ± 0.93  | 2.04 |
| <b>MFAP5</b>        | microfibrillar associated protein 5                                                         | 8076      | A_33_P3708413  | -1.27 ± 2.00 | 0.69 |
| <b>DAPK2</b>        | death-associated protein kinase 2                                                           | 23604     | A_24_P10233    | 1.27 ± 1.35  | 1.20 |
| <b>TTY16</b>        | testis-specific transcript, Y-linked 16 (non-protein coding)                                | 252948    | A_33_P3349495  | 1.27 ± 1.04  | 1.71 |
| <b>LINC00346</b>    | lincRNA 346                                                                                 | 283487    | A_23_P368909   | -1.27 ± 1.01 | 1.79 |
| <b>LOC101928075</b> | uncharacterized LOC101928075                                                                | 101928075 | A_22_P00009780 | -1.27 ± 0.84 | 2.35 |
| <b>COLQ</b>         | collagen-like tail subunit (single strand of homotrimer) of asymmetric acetylcholinesterase | 8292      | A_23_P212126   | 1.27 ± 0.82  | 2.40 |
| <b>KCNK12</b>       | potassium channel, two pore domain subfamily K, member 12                                   | 56660     | A_33_P3256510  | -1.26 ± 1.36 | 1.17 |
| <b>PCSK1</b>        | proprotein convertase subtilisin/kexin type 1                                               | 5122      | A_24_P174793   | -1.26 ± 1.01 | 1.78 |
| <b>ZAN</b>          | zonadhesin (gene/pseudogene)                                                                | 7455      | A_23_P82286    | 1.26 ± 0.81  | 2.44 |
| <b>LMO7</b>         | LIM domain 7                                                                                | 4008      | A_33_P3280801  | 1.26 ± 0.81  | 2.42 |
| <b>CDH16</b>        | cadherin 16, KSP-cadherin                                                                   | 1014      | A_23_P100240   | 1.26 ± 0.74  | 2.78 |
| <b>SSTR1</b>        | somatostatin receptor 1                                                                     | 6751      | A_24_P244706   | 1.25 ± 1.39  | 1.12 |

|                      |                                                                            |           |                |              |      |
|----------------------|----------------------------------------------------------------------------|-----------|----------------|--------------|------|
| <b>GZMH</b>          | granzyme H (cathepsin G-like 2, protein h-CCPX)                            | 2999      | A_23_P128993   | 1.25 ± 1.26  | 1.29 |
| <b>SPRR2F</b>        | small proline-rich protein 2F                                              | 6705      | A_33_P3274811  | -1.25 ± 1.12 | 1.51 |
| <b>ANKRD20A2</b>     | ankyrin repeat domain 20 family, member A2                                 | 441425    | A_21_P0010771  | 1.25 ± 1.11  | 1.53 |
| <b>LOC100130691</b>  | uncharacterized LOC100130691                                               | 100130691 | A_19_P00315584 | 1.25 ± 1.08  | 1.61 |
| <b>TMEM38B</b>       | transmembrane protein 38B                                                  | 55151     | A_23_P60259    | -1.25 ± 0.90 | 2.07 |
| <b>ARL13B</b>        | ADP-ribosylation factor-like 13B                                           | 200894    | A_23_P10081    | 1.25 ± 0.87  | 2.18 |
| <b>GLB1L3</b>        | galactosidase, beta 1-like 3                                               | 112937    | A_32_P741851   | 1.25 ± 0.80  | 2.48 |
| <b>KIAA1683</b>      | KIAA1683                                                                   | 80726     | A_23_P130974   | 1.24 ± 1.08  | 1.58 |
| <b>ADIRF</b>         | adipogenesis regulatory factor                                             | 10974     | A_23_P161439   | 1.24 ± 1.04  | 1.67 |
| <b>RNASE2</b>        | ribonuclease, RNase A family, 2 (liver, eosinophil-derived neurotoxin)     | 6036      | A_23_P151637   | -1.24 ± 0.85 | 2.23 |
| <b>TENM2</b>         | teneurin transmembrane protein 2                                           | 57451     | A_24_P299474   | -1.23 ± 2.34 | 0.54 |
| <b>HTR2B</b>         | 5-hydroxytryptamine (serotonin) receptor 2B, G protein-coupled             | 3357      | A_23_P16953    | 1.23 ± 1.62  | 0.88 |
| <b>KRT6B</b>         | keratin 6B, type II                                                        | 3854      | A_23_P76249    | -1.23 ± 1.55 | 0.94 |
| <b>TNNC1</b>         | troponin C type 1 (slow)                                                   | 7134      | A_23_P166823   | 1.23 ± 1.30  | 1.20 |
| <b>FPR1</b>          | formyl peptide receptor 1                                                  | 2357      | A_23_P38795    | -1.23 ± 0.98 | 1.81 |
| <b>MYOZ1</b>         | myozenin 1                                                                 | 58529     | A_23_P1320     | 1.23 ± 0.98  | 1.78 |
| <b>C20orf166-AS1</b> | C20orf166 antisense RNA 1                                                  |           | A_33_P3423853  | 1.23 ± 0.84  | 2.22 |
| <b>HECW2</b>         | HECT, C2 and WW domain containing E3 ubiquitin protein ligase 2            | 57520     | A_33_P3270311  | 1.22 ± 1.79  | 0.77 |
| <b>RHOV</b>          | ras homolog family member V                                                | 171177    | A_23_P424561   | -1.22 ± 1.51 | 0.97 |
| <b>CXCL14</b>        | chemokine (C-X-C motif) ligand 14                                          | 9547      | A_33_P3590259  | -1.22 ± 1.51 | 0.96 |
| <b>SLC22A18AS</b>    | solute carrier family 22 (organic cation transporter), member 18 antisense | 5003      | A_33_P3316587  | -1.22 ± 1.04 | 1.63 |
| <b>KLHL22</b>        | kelch-like family member 22                                                | 84861     | A_24_P117323   | 1.22 ± 0.87  | 2.10 |
| <b>LINC00935</b>     | lincRNA 935                                                                | 255411    | A_32_P161994   | 1.22 ± 0.70  | 2.87 |
| <b>XCL1</b>          | chemokine (C motif) ligand 1                                               | 6375      | A_24_P45476    | 1.21 ± 1.07  | 1.53 |
| <b>LOC344887</b>     | NmrA-like family domain containing 1 pseudogene                            |           | A_24_P68908    | -1.21 ± 1.02 | 1.66 |
| <b>GYG2P1</b>        | glycogenin 2 pseudogene 1                                                  |           | A_33_P3253598  | 1.21 ± 1.00  | 1.73 |
| <b>IGLL1</b>         | immunoglobulin lambda-like polypeptide 1                                   | 3543      | A_24_P239076   | -1.21 ± 0.93 | 1.89 |

|                     |                                                                               |           |                |              |      |
|---------------------|-------------------------------------------------------------------------------|-----------|----------------|--------------|------|
| <b>TSHB</b>         | thyroid stimulating hormone, beta                                             | 7252      | A_23_P12128    | 1.21 ± 0.93  | 1.89 |
| <b>PNLIPRP3</b>     | pancreatic lipase-related protein 3                                           | 119548    | A_33_P3368193  | -1.21 ± 0.92 | 1.93 |
| <b>SLC1A3</b>       | solute carrier family 1 (glial high affinity glutamate transporter), member 3 | 6507      | A_24_P286114   | -1.21 ± 0.72 | 2.68 |
| <b>MRAP</b>         | melanocortin 2 receptor accessory protein                                     | 56246     | A_24_P126210   | -1.20 ± 1.64 | 0.83 |
| <b>LINC01116</b>    | lincRNA 1116                                                                  |           | A_23_P302787   | -1.20 ± 1.46 | 0.98 |
| <b>AZGP1</b>        | alpha-2-glycoprotein 1, zinc-binding                                          | 563       | A_23_P71270    | -1.20 ± 1.38 | 1.06 |
| <b>NDNF</b>         | neuron-derived neurotrophic factor                                            | 79625     | A_23_P110266   | 1.20 ± 1.28  | 1.20 |
| <b>C1orf116</b>     | chromosome 1 open reading frame 116                                           | 79098     | A_23_P897      | 1.20 ± 0.98  | 1.73 |
| <b>DDIT4</b>        | DNA-damage-inducible transcript 4                                             | 54541     | A_23_P104318   | -1.20 ± 0.82 | 2.24 |
| <b>CDH15</b>        | cadherin 15, type 1, M-cadherin (myotubule)                                   | 1013      | A_32_P25357    | -1.20 ± 0.75 | 2.52 |
| <b>LOC100133286</b> | uncharacterized LOC100133286                                                  | 100133286 | A_33_P3235117  | -1.20 ± 0.65 | 3.06 |
| <b>KREMEN2</b>      | kringle containing transmembrane protein 2                                    | 79412     | A_33_P3396214  | -1.19 ± 1.16 | 1.35 |
| <b>CREB3L3</b>      | cAMP responsive element binding protein 3-like 3                              | 84699     | A_23_P108082   | 1.19 ± 1.10  | 1.45 |
| <b>VTRNA2-1</b>     | vault RNA 2-1                                                                 | 100126299 | A_21_P0000584  | -1.19 ± 1.08 | 1.49 |
| <b>PODNL1</b>       | podocan-like 1                                                                | 79883     | A_23_P433798   | -1.19 ± 1.01 | 1.65 |
| <b>CYP39A1</b>      | cytochrome P450, family 39, subfamily A, polypeptide 1                        | 51302     | A_23_P133712   | 1.19 ± 1.01  | 1.63 |
| <b>FXVD4</b>        | FXVD domain containing ion transport regulator 4                              | 53828     | A_23_P98121    | 1.19 ± 0.98  | 1.72 |
| <b>CPNE5</b>        | copine V                                                                      | 57699     | A_23_P360804   | -1.19 ± 0.91 | 1.90 |
| <b>LOC100996660</b> | uncharacterized LOC100996660                                                  |           | A_21_P0011598  | 1.19 ± 0.86  | 2.05 |
| <b>PPP1R2P9</b>     | protein phosphatase 1, regulatory (inhibitor) subunit 2 pseudogene 9          |           | A_23_P34007    | -1.19 ± 0.84 | 2.11 |
| <b>PLVAP</b>        | plasmalemma vesicle associated protein                                        | 83483     | A_23_P56328    | -1.19 ± 0.76 | 2.47 |
| <b>LOC389641</b>    | uncharacterized LOC389641                                                     | 389641    | A_22_P00004017 | -1.19 ± 0.75 | 2.52 |
| <b>LINC00293</b>    | lincRNA 293                                                                   | 497634    | A_33_P3237859  | -1.19 ± 0.74 | 2.52 |
| <b>GGT8P</b>        | gamma-glutamyltransferase 8 pseudogene                                        |           | A_24_P375322   | 1.19 ± 0.68  | 2.86 |
| <b>LINC01506</b>    | lincRNA 1506                                                                  | 101927015 | A_21_P0006079  | -1.19 ± 0.64 | 3.13 |
| <b>OXTR</b>         | oxytocin receptor                                                             | 5021      | A_33_P3413741  | -1.18 ± 2.44 | 0.48 |
| <b>PEBP4</b>        | phosphatidylethanolamine-binding protein 4                                    | 157310    | A_33_P3627001  | 1.18 ± 1.67  | 0.80 |
| <b>EDNRB</b>        | endothelin receptor type B                                                    | 1910      | A_24_P330263   | 1.18 ± 1.53  | 0.90 |

|                     |                                                               |           |                |              |      |
|---------------------|---------------------------------------------------------------|-----------|----------------|--------------|------|
| <b>CYP3A5</b>       | cytochrome P450, family 3, subfamily A, polypeptide 5         | 1577      | A_23_P8801     | 1.18 ± 1.24  | 1.22 |
| <b>TLE6</b>         | transducin-like enhancer of split 6                           | 79816     | A_23_P208937   | 1.18 ± 1.00  | 1.63 |
| <b>SHCBP1</b>       | SHC SH2-domain binding protein 1                              | 79801     | A_32_P96719    | -1.18 ± 0.93 | 1.81 |
| <b>LOC101927311</b> | uncharacterized LOC101927311                                  | 101927311 | A_22_P00011483 | 1.18 ± 0.91  | 1.89 |
| <b>MT1X</b>         | metallothionein 1X                                            | 4501      | A_33_P3236868  | -1.18 ± 0.88 | 1.97 |
| <b>ANKRD30BP2</b>   | ankyrin repeat domain 30B pseudogene 2                        |           | A_24_P917819   | -1.18 ± 0.83 | 2.13 |
| <b>C2CD4B</b>       | C2 calcium-dependent domain containing 4B                     | 388125    | A_24_P788878   | 1.18 ± 0.79  | 2.27 |
| <b>CLEC1B</b>       | C-type lectin domain family 1, member B                       | 51266     | A_33_P3332955  | 1.18 ± 0.74  | 2.53 |
| <b>BLK</b>          | BLK proto-oncogene, Src family tyrosine kinase                | 640       | A_23_P31725    | -1.17 ± 1.41 | 0.99 |
| <b>CLCA2</b>        | chloride channel accessory 2                                  | 9635      | A_23_P397248   | -1.17 ± 1.33 | 1.09 |
| <b>FAM167A</b>      | family with sequence similarity 167, member A                 | 83648     | A_23_P334955   | 1.17 ± 1.06  | 1.49 |
| <b>SHISA2</b>       | shisa family member 2                                         | 387914    | A_32_P55241    | 1.17 ± 1.05  | 1.52 |
| <b>UBE2C</b>        | ubiquitin-conjugating enzyme E2C                              | 11065     | A_24_P297539   | -1.17 ± 0.91 | 1.87 |
| <b>SUN5</b>         | Sad1 and UNC84 domain containing 5                            | 140732    | A_33_P3292198  | 1.17 ± 0.91  | 1.87 |
| <b>CSH2</b>         | chorionic somatomammotropin hormone 2                         | 1443      | A_23_P207174   | -1.17 ± 0.90 | 1.88 |
| <b>DDIAS</b>        | DNA damage-induced apoptosis suppressor                       | 220042    | A_23_P429491   | -1.17 ± 0.89 | 1.93 |
| <b>TIMP1</b>        | TIMP metalloproteinase inhibitor 1                            | 7076      | A_23_P62115    | -1.17 ± 0.86 | 2.02 |
| <b>KCNE2</b>        | potassium voltage-gated channel, Isk-related family, member 2 | 9992      | A_23_P120694   | 1.17 ± 0.67  | 2.84 |
| <b>C3orf67-AS1</b>  | C3orf67 antisense RNA 1                                       | 101929238 | A_22_P00008596 | 1.16 ± 1.36  | 1.04 |
| <b>FCRLA</b>        | Fc receptor-like A                                            | 84824     | A_23_P46039    | -1.16 ± 1.06 | 1.47 |
| <b>BIRC5</b>        | baculoviral IAP repeat containing 5                           | 332       | A_23_P118815   | -1.16 ± 1.01 | 1.59 |
| <b>SCN3B</b>        | sodium channel, voltage gated, type III beta subunit          | 55800     | A_33_P3402404  | -1.16 ± 0.97 | 1.66 |
| <b>NUCB1-AS1</b>    | NUCB1 antisense RNA 1                                         | 100874085 | A_22_P00017074 | -1.16 ± 0.86 | 2.00 |
| <b>SLC25A30-AS1</b> | SLC25A30 antisense RNA 1                                      | 100874259 | A_22_P00025147 | 1.16 ± 0.83  | 2.09 |
| <b>NYX</b>          | nyctalopin                                                    | 60506     | A_23_P137046   | -1.16 ± 0.83 | 2.08 |
| <b>ESPL1</b>        | extra spindle pole bodies homolog 1 ( <i>S. cerevisiae</i> )  | 9700      | A_23_P32707    | -1.16 ± 0.73 | 2.49 |
| <b>TTYH1</b>        | tweety family member 1                                        | 57348     | A_23_P50815    | -1.16 ± 0.60 | 3.30 |
| <b>TNS4</b>         | tensin 4                                                      | 84951     | A_23_P207850   | -1.15 ± 2.12 | 0.56 |

|                     |                                                                                |           |                |              |      |
|---------------------|--------------------------------------------------------------------------------|-----------|----------------|--------------|------|
| <b>KRT23</b>        | keratin 23, type I                                                             | 25984     | A_23_P78248    | -1.15 ± 1.68 | 0.76 |
| <b>ANGPTL4</b>      | angiopoietin-like 4                                                            | 51129     | A_33_P3295358  | -1.15 ± 1.56 | 0.85 |
| <b>SNORD83A</b>     | small nucleolar RNA, C/D box 83A                                               | 116937    | A_21_P0000224  | -1.15 ± 1.52 | 0.89 |
| <b>E2F2</b>         | E2F transcription factor 2                                                     | 1870      | A_23_P408955   | -1.15 ± 1.13 | 1.34 |
| <b>ERP44</b>        | endoplasmic reticulum protein 44                                               | 23071     | A_23_P373927   | 1.15 ± 1.04  | 1.49 |
| <b>L3MBTL4</b>      | l(3)mbt-like 4 (Drosophila)                                                    | 91133     | A_23_P326474   | 1.15 ± 0.87  | 1.91 |
| <b>LOC101929066</b> | uncharacterized LOC101929066                                                   | 101929066 | A_22_P00011609 | 1.15 ± 0.71  | 2.58 |
| <b>LRRC31</b>       | leucine rich repeat containing 31                                              | 79782     | A_24_P240259   | 1.15 ± 0.71  | 2.57 |
| <b>CHEK1</b>        | checkpoint kinase 1                                                            | 1111      | A_33_P3349536  | -1.15 ± 0.68 | 2.76 |
| <b>ZFY</b>          | zinc finger protein, Y-linked                                                  | 7544      | A_24_P942743   | 1.14 ± 1.58  | 0.82 |
| <b>MMP24</b>        | matrix metalloproteinase 24 (membrane-inserted)                                | 10893     | A_33_P3398331  | 1.14 ± 1.34  | 1.03 |
| <b>TXNDC2</b>       | thioredoxin domain containing 2 (spermatozoa)                                  | 84203     | A_24_P125434   | 1.14 ± 1.24  | 1.16 |
| <b>AGTR1</b>        | angiotensin II receptor, type 1                                                | 185       | A_23_P166616   | 1.14 ± 1.18  | 1.23 |
| <b>LPFR4</b>        | lipid phosphate phosphatase-related protein type 4                             | 9890      | A_32_P148538   | 1.14 ± 1.07  | 1.43 |
| <b>PLA2R1</b>       | phospholipase A2 receptor 1, 180kDa                                            | 22925     | A_23_P142830   | 1.14 ± 0.97  | 1.64 |
| <b>SNAI3-AS1</b>    | SNAI3 antisense RNA 1                                                          | 197187    | A_23_P406227   | -1.14 ± 0.91 | 1.79 |
| <b>LOC101928195</b> | monofunctional C1-tetrahydrofolate synthase, mitochondrial-like                |           | A_21_P0013573  | 1.14 ± 0.91  | 1.79 |
| <b>GLS2</b>         | glutaminase 2 (liver, mitochondrial)                                           | 27165     | A_24_P326739   | 1.14 ± 0.87  | 1.93 |
| <b>SIGLEC15</b>     | sialic acid binding Ig-like lectin 15                                          | 284266    | A_23_P50146    | -1.14 ± 0.75 | 2.37 |
| <b>CXCL1</b>        | chemokine (C-X-C motif) ligand 1 (melanoma growth stimulating activity, alpha) | 2919      | A_23_P7144     | -1.13 ± 2.38 | 0.47 |
| <b>SLC4A5</b>       | solute carrier family 4 (sodium bicarbonate cotransporter), member 5           | 57835     | A_33_P3241393  | 1.13 ± 1.19  | 1.21 |
| <b>SNAR-G1</b>      | small ILF3/NF90-associated RNA G1                                              |           | A_21_P0000491  | 1.13 ± 1.17  | 1.25 |
| <b>DIRAS3</b>       | DIRAS family, GTP-binding RAS-like 3                                           | 9077      | A_23_P149121   | 1.13 ± 1.14  | 1.29 |
| <b>ODAM</b>         | odontogenic, ameloblast associated                                             | 54959     | A_23_P58228    | 1.13 ± 1.01  | 1.52 |
| <b>ELFN2</b>        | extracellular leucine-rich repeat and fibronectin type III domain containing 2 | 114794    | A_32_P219279   | 1.13 ± 0.91  | 1.77 |
| <b>LINC01060</b>    | lincRNA 1060                                                                   | 401164    | A_21_P0000610  | -1.13 ± 0.64 | 2.92 |
| <b>MYC</b>          | v-myc avian myelocytomatosis viral oncogene                                    | 4609      | A_23_P215956   | -1.13 ± 0.56 | 3.47 |

|                     |                                                         |           |                |              |      |
|---------------------|---------------------------------------------------------|-----------|----------------|--------------|------|
|                     | homolog                                                 |           |                |              |      |
| <b>RARRES1</b>      | retinoic acid receptor responder (tazarotene induced) 1 | 5918      | A_23_P18078    | -1.12 ± 1.96 | 0.60 |
| <b>SNORD114-20</b>  | small nucleolar RNA, C/D box 114-20                     | 767598    | A_21_P0000417  | -1.12 ± 1.30 | 1.05 |
| <b>CBX2</b>         | chromobox homolog 2                                     | 84733     | A_33_P3423949  | 1.12 ± 0.93  | 1.70 |
| <b>TNN</b>          | tenascin N                                              | 63923     | A_32_P480177   | 1.12 ± 0.91  | 1.73 |
| <b>FOXD4</b>        | forkhead box D4                                         | 2298      | A_32_P119248   | 1.12 ± 0.85  | 1.93 |
| <b>OR4F21</b>       | olfactory receptor, family 4, subfamily F, member 21    | 441308    | A_33_P3316147  | 1.12 ± 0.85  | 1.91 |
| <b>CAV1</b>         | caveolin 1, caveolae protein, 22kDa                     | 857       | A_23_P134454   | 1.12 ± 0.84  | 1.97 |
| <b>TBR1</b>         | T-box, brain, 1                                         | 10716     | A_22_P00014844 | 1.12 ± 0.75  | 2.31 |
| <b>LOC101927902</b> | uncharacterized LOC101927902                            |           | A_21_P0005196  | -1.12 ± 0.74 | 2.33 |
| <b>IL12RB1</b>      | interleukin 12 receptor, beta 1                         | 3594      | A_23_P399156   | 1.12 ± 0.68  | 2.63 |
| <b>MSMB</b>         | microseminoprotein, beta-                               | 4477      | A_24_P146683   | -1.11 ± 2.13 | 0.53 |
| <b>MEG9</b>         | maternally expressed 9 (non-protein coding)             | 100507257 | A_21_P0011281  | -1.11 ± 1.32 | 1.03 |
| <b>LINC01164</b>    | lincRNA 1164                                            | 399827    | A_33_P3362034  | -1.11 ± 0.96 | 1.59 |
| <b>LOC100129931</b> | uncharacterized LOC100129931                            | 100129931 | A_22_P00003503 | -1.11 ± 0.88 | 1.82 |
| <b>SELL</b>         | selectin L                                              | 6402      | A_33_P3400273  | -1.11 ± 0.74 | 2.31 |
| <b>CACNG4</b>       | calcium channel, voltage-dependent, gamma subunit 4     | 27092     | A_24_P70303    | 1.11 ± 0.66  | 2.73 |
| <b>ZNF252P-AS1</b>  | ZNF252P antisense RNA 1                                 | 286103    | A_32_P935906   | 1.11 ± 0.62  | 2.99 |
| <b>FJX1</b>         | four jointed box 1 (Drosophila)                         | 24147     | A_23_P150693   | -1.11 ± 0.60 | 3.12 |
| <b>SNORA2B</b>      | small nucleolar RNA, H/ACA box 2B                       | 677794    | A_21_P0000307  | 1.10 ± 2.71  | 0.39 |
| <b>TSPAN19</b>      | tetraspanin 19                                          | 144448    | A_23_P2322     | -1.10 ± 1.60 | 0.78 |
| <b>CAPN13</b>       | calpain 13                                              | 92291     | A_23_P101972   | -1.10 ± 1.60 | 0.77 |
| <b>HTR3C</b>        | 5-hydroxytryptamine (serotonin) receptor 3C, ionotropic | 170572    | A_23_P124402   | 1.10 ± 1.45  | 0.88 |
| <b>CADM1</b>        | cell adhesion molecule 1                                | 23705     | A_33_P3421913  | 1.10 ± 1.31  | 1.01 |
| <b>TG</b>           | thyroglobulin                                           | 7038      | A_23_P32454    | -1.10 ± 1.25 | 1.09 |
| <b>HIST1H3B</b>     | histone cluster 1, H3b                                  | 8358      | A_23_P93258    | -1.10 ± 1.21 | 1.13 |
| <b>XAGE2</b>        | X antigen family, member 2                              | 9502      | A_23_P34031    | 1.10 ± 1.16  | 1.21 |



|                     |                                                                 |           |                |              |      |
|---------------------|-----------------------------------------------------------------|-----------|----------------|--------------|------|
| <b>EMR1</b>         | egf-like module containing, mucin-like, hormone receptor-like 1 | 2015      | A_33_P3215803  | 1.10 ± 1.06  | 1.37 |
| <b>LOC101929450</b> | uncharacterized LOC101929450                                    | 101929450 | A_19_P00321279 | -1.10 ± 0.97 | 1.55 |
| <b>RNLS</b>         | renalase, FAD-dependent amine oxidase                           | 55328     | A_23_P202501   | 1.10 ± 0.96  | 1.59 |
| <b>GDPD3</b>        | glycerophosphodiester phosphodiesterase domain containing 3     | 79153     | A_23_P26511    | 1.10 ± 0.95  | 1.61 |
| <b>LOC101928906</b> | uncharacterized LOC101928906                                    |           | A_21_P0006270  | 1.10 ± 0.95  | 1.60 |
| <b>NOVA1-AS1</b>    | NOVA1 antisense RNA 1 (head to head)                            | 102725045 | A_21_P0008504  | -1.10 ± 0.91 | 1.71 |
| <b>DDX58</b>        | DEAD (Asp-Glu-Ala-Asp) box polypeptide 58                       | 23586     | A_33_P3372910  | 1.10 ± 0.89  | 1.78 |
| <b>SH3GL3</b>       | SH3-domain GRB2-like 3                                          | 6457      | A_23_P48988    | 1.10 ± 0.89  | 1.78 |
| <b>TSC22D3</b>      | TSC22 domain family, member 3                                   | 1831      | A_33_P3237634  | -1.10 ± 0.85 | 1.88 |
| <b>MURC</b>         | muscle-related coiled-coil protein                              | 347273    | A_33_P3335147  | 1.10 ± 0.78  | 2.15 |
| <b>PMPCB</b>        | peptidase (mitochondrial processing) beta                       | 9512      | A_33_P3294162  | 1.10 ± 0.77  | 2.14 |
| <b>OR4F29</b>       | olfactory receptor, family 4, subfamily F, member 29            | 81399     | A_33_P3268582  | 1.10 ± 0.73  | 2.32 |
| <b>KRT1</b>         | keratin 1, type II                                              | 3848      | A_33_P3379396  | 1.09 ± 1.18  | 1.16 |
| <b>STAR</b>         | steroidogenic acute regulatory protein                          | 6770      | A_23_P8981     | -1.09 ± 1.07 | 1.34 |
| <b>AADAC</b>        | arylacetamide deacetylase                                       | 13        | A_23_P80570    | 1.09 ± 1.01  | 1.43 |
| <b>INSC</b>         | inscuteable homolog (Drosophila)                                | 387755    | A_33_P3814721  | 1.09 ± 0.99  | 1.49 |
| <b>LOC101930162</b> | uncharacterized LOC101930162                                    |           | A_22_P00012430 | 1.09 ± 0.92  | 1.66 |
| <b>LOC391322</b>    | D-dopachrome tautomerase-like                                   |           | A_33_P3379341  | -1.09 ± 0.91 | 1.67 |
| <b>SIGLEC10</b>     | sialic acid binding Ig-like lectin 10                           | 89790     | A_23_P208182   | -1.09 ± 0.74 | 2.25 |
| <b>SNORD59B</b>     | small nucleolar RNA, C/D box 59B                                |           | A_21_P0000374  | 1.09 ± 0.72  | 2.34 |
| <b>AZU1</b>         | azurocidin 1                                                    | 566       | A_33_P3279353  | 1.09 ± 0.69  | 2.49 |
| <b>ZNF792</b>       | zinc finger protein 792                                         | 126375    | A_23_P67618    | 1.09 ± 0.67  | 2.55 |
| <b>LINC01119</b>    | lincRNA 1119                                                    | 100134259 | A_21_P0001773  | -1.09 ± 0.65 | 2.70 |
| <b>ACAN</b>         | aggrecan                                                        | 176       | A_23_P307310   | -1.08 ± 2.24 | 0.48 |
| <b>S100A9</b>       | S100 calcium binding protein A9                                 | 6280      | A_23_P23048    | -1.08 ± 1.40 | 0.90 |
| <b>SPNS3</b>        | spinster homolog 3 (Drosophila)                                 | 201305    | A_23_P100963   | 1.08 ± 0.93  | 1.61 |
| <b>PSAT1</b>        | phosphoserine aminotransferase 1                                | 29968     | A_23_P259692   | -1.08 ± 0.88 | 1.75 |
| <b>FOXA2</b>        | forkhead box A2                                                 | 3170      | A_24_P365515   | 1.08 ± 0.74  | 2.21 |

|                     |                                                                           |        |                |              |      |
|---------------------|---------------------------------------------------------------------------|--------|----------------|--------------|------|
| <b>ZNF503-AS1</b>   | ZNF503 antisense RNA 1                                                    | 253264 | A_21_P0010924  | 1.07 ± 1.46  | 0.84 |
| <b>SBF2-AS1</b>     | SBF2 antisense RNA 1                                                      | 283104 | A_22_P00015662 | -1.07 ± 1.29 | 1.00 |
| <b>B3GNT3</b>       | UDP-GlcNAc:betaGal beta-1,3-N-acetylglucosaminyltransferase 3             | 10331  | A_23_P78980    | -1.07 ± 1.22 | 1.08 |
| <b>SLC29A4</b>      | solute carrier family 29 (equilibrative nucleoside transporter), member 4 | 222962 | A_23_P168551   | 1.07 ± 1.12  | 1.21 |
| <b>BLM</b>          | Bloom syndrome, RecQ helicase-like                                        | 641    | A_23_P88630    | -1.07 ± 0.99 | 1.46 |
| <b>TNFRSF13B</b>    | tumor necrosis factor receptor superfamily, member 13B                    | 23495  | A_23_P84705    | -1.07 ± 0.89 | 1.71 |
| <b>HABP2</b>        | hyaluronan binding protein 2                                              | 3026   | A_23_P1173     | 1.07 ± 0.80  | 1.96 |
| <b>C15orf27</b>     | chromosome 15 open reading frame 27                                       | 123591 | A_23_P88678    | -1.07 ± 0.76 | 2.11 |
| <b>KIAA1958</b>     | KIAA1958                                                                  |        | A_33_P3314341  | 1.07 ± 0.74  | 2.19 |
| <b>IFT57</b>        | intraflagellar transport 57                                               | 55081  | A_24_P362881   | 1.07 ± 0.66  | 2.60 |
| <b>HTRA4</b>        | HtrA serine peptidase 4                                                   | 203100 | A_23_P44421    | -1.06 ± 1.40 | 0.88 |
| <b>SAMD3</b>        | sterile alpha motif domain containing 3                                   | 154075 | A_23_P93524    | 1.06 ± 1.35  | 0.93 |
| <b>LOC440040</b>    | glutamate receptor, metabotropic 5 pseudogene                             | 440040 | A_23_P150198   | 1.06 ± 1.21  | 1.08 |
| <b>VMO1</b>         | vitelline membrane outer layer 1 homolog (chicken)                        | 284013 | A_23_P55356    | -1.06 ± 1.15 | 1.17 |
| <b>GGTLC1</b>       | gamma-glutamyltransferase light chain 1                                   | 92086  | A_23_P57199    | 1.06 ± 1.07  | 1.28 |
| <b>CATSPER3</b>     | cation channel, sperm associated 3                                        | 347732 | A_23_P393749   | 1.06 ± 0.86  | 1.74 |
| <b>ZNF483</b>       | zinc finger protein 483                                                   | 158399 | A_33_P3620832  | 1.06 ± 0.79  | 1.98 |
| <b>UBASH3A</b>      | ubiquitin associated and SH3 domain containing A                          | 53347  | A_33_P3385909  | -1.06 ± 0.75 | 2.14 |
| <b>OTOS</b>         | otospiralin                                                               | 150677 | A_23_P90997    | -1.06 ± 0.69 | 2.40 |
| <b>ADAM12</b>       | ADAM metallopeptidase domain 12                                           | 8038   | A_22_P00000010 | -1.05 ± 1.56 | 0.75 |
| <b>ALOX15B</b>      | arachidonate 15-lipoxygenase, type B                                      | 247    | A_23_P60627    | -1.05 ± 1.33 | 0.94 |
| <b>CCL20</b>        | chemokine (C-C motif) ligand 20                                           | 6364   | A_23_P17065    | -1.05 ± 1.33 | 0.94 |
| <b>C1orf94</b>      | chromosome 1 open reading frame 94                                        | 84970  | A_23_P160297   | -1.05 ± 1.23 | 1.05 |
| <b>FOXM1</b>        | forkhead box M1                                                           | 2305   | A_23_P151150   | -1.05 ± 1.06 | 1.28 |
| <b>ZNF519</b>       | zinc finger protein 519                                                   | 162655 | A_23_P328766   | 1.05 ± 0.92  | 1.57 |
| <b>LOC100128288</b> | uncharacterized LOC100128288                                              |        | A_24_P256415   | 1.05 ± 0.91  | 1.58 |
| <b>DNASE2B</b>      | deoxyribonuclease II beta                                                 | 58511  | A_23_P126677   | -1.05 ± 0.90 | 1.62 |

|                     |                                                                         |           |                |              |      |
|---------------------|-------------------------------------------------------------------------|-----------|----------------|--------------|------|
| <b>FLT4</b>         | fms-related tyrosine kinase 4                                           | 2324      | A_23_P356070   | 1.05 ± 0.79  | 1.97 |
| <b>PRTG</b>         | protogenin                                                              | 283659    | A_33_P3234657  | 1.05 ± 0.77  | 2.02 |
| <b>LSP1</b>         | lymphocyte-specific protein 1                                           | 4046      | A_22_P00025404 | -1.05 ± 0.76 | 2.06 |
| <b>SNORD114-10</b>  | small nucleolar RNA, C/D box 114-10                                     | 767588    | A_21_P0000407  | -1.05 ± 0.76 | 2.06 |
| <b>LINC00260</b>    | lincRNA 260                                                             |           | A_33_P3210810  | 1.05 ± 0.75  | 2.09 |
| <b>ANKRD20A5P</b>   | ankyrin repeat domain 20 family, member A5, pseudogene                  |           | A_21_P0012183  | 1.05 ± 0.73  | 2.16 |
| <b>GLRA4</b>        | glycine receptor, alpha 4                                               | 441509    | A_24_P404868   | 1.05 ± 0.70  | 2.28 |
| <b>FKBP11</b>       | FK506 binding protein 11, 19 kDa                                        | 51303     | A_33_P3267296  | -1.05 ± 0.66 | 2.51 |
| <b>EGFLAM-AS4</b>   | EGFLAM antisense RNA 4                                                  | 100852408 | A_22_P00025440 | -1.05 ± 0.57 | 3.07 |
| <b>LOC102723617</b> | uncharacterized LOC102723617                                            | 102723617 | A_21_P0011769  | 1.05 ± 0.49  | 3.76 |
| <b>HSD17B2</b>      | hydroxysteroid (17-beta) dehydrogenase 2                                | 3294      | A_23_P118065   | -1.04 ± 1.95 | 0.55 |
| <b>CALB2</b>        | calbindin 2                                                             | 794       | A_23_P21092    | -1.04 ± 1.51 | 0.77 |
| <b>GATA5</b>        | GATA binding protein 5                                                  | 140628    | A_23_P371835   | 1.04 ± 1.41  | 0.85 |
| <b>FSIP1</b>        | fibrous sheath interacting protein 1                                    | 161835    | A_22_P00006743 | 1.04 ± 1.09  | 1.22 |
| <b>MOGAT1</b>       | monoacylglycerol O-acyltransferase 1                                    | 116255    | A_23_P142574   | 1.04 ± 1.06  | 1.27 |
| <b>HCN3</b>         | hyperpolarization activated cyclic nucleotide gated potassium channel 3 | 57657     | A_23_P34827    | 1.04 ± 0.91  | 1.56 |
| <b>CRISP2</b>       | cysteine-rich secretory protein 2                                       | 7180      | A_32_P173662   | -1.04 ± 0.89 | 1.62 |
| <b>GFPT2</b>        | glutamine-fructose-6-phosphate transaminase 2                           | 9945      | A_23_P144916   | -1.04 ± 0.87 | 1.69 |
| <b>FAM198A</b>      | family with sequence similarity 198, member A                           | 729085    | A_23_P69154    | -1.04 ± 0.87 | 1.68 |
| <b>CHAC2</b>        | ChaC, cation transport regulator homolog 2 (E. coli)                    | 494143    | A_32_P194264   | -1.04 ± 0.87 | 1.67 |
| <b>LINC01554</b>    | lincRNA 1554                                                            |           | A_32_P128209   | -1.04 ± 0.85 | 1.74 |
| <b>C10orf90</b>     | chromosome 10 open reading frame 90                                     | 118611    | A_32_P191441   | -1.04 ± 0.70 | 2.30 |
| <b>LINC01490</b>    | lincRNA 1490                                                            | 101928420 | A_22_P00010372 | -1.04 ± 0.70 | 2.30 |
| <b>KCNJ13</b>       | potassium channel, inwardly rectifying subfamily J, member 13           | 3769      | A_33_P3314857  | 1.04 ± 0.60  | 2.82 |
| <b>LCN15</b>        | lipocalin 15                                                            | 389812    | A_33_P3263938  | 1.04 ± 0.58  | 2.94 |
| <b>LOC388780</b>    | uncharacterized LOC388780                                               |           | A_33_P3241661  | -1.03 ± 1.55 | 0.74 |
| <b>CXCL8</b>        | chemokine (C-X-C motif) ligand 8                                        | 3576      | A_32_P87013    | -1.03 ± 1.52 | 0.76 |

|                     |                                                                     |           |                |              |      |
|---------------------|---------------------------------------------------------------------|-----------|----------------|--------------|------|
| <b>ZNF683</b>       | zinc finger protein 683                                             | 257101    | A_33_P3208970  | 1.03 ± 1.37  | 0.88 |
| <b>BDKRB1</b>       | bradykinin receptor B1                                              | 623       | A_23_P128744   | -1.03 ± 1.29 | 0.95 |
| <b>LRRIQ3</b>       | leucine-rich repeats and IQ motif containing 3                      | 127255    | A_33_P3292387  | -1.03 ± 1.20 | 1.05 |
| <b>LLPH-AS1</b>     | LLPH antisense RNA 1 (head to head)                                 | 103625681 | A_22_P00008226 | 1.03 ± 1.11  | 1.17 |
| <b>ADORA1</b>       | adenosine A1 receptor                                               | 134       | A_23_P74299    | 1.03 ± 1.09  | 1.21 |
| <b>LOC102724851</b> | uncharacterized LOC102724851                                        |           | A_21_P0004864  | 1.03 ± 1.06  | 1.24 |
| <b>LINC01268</b>    | lincRNA 1268                                                        | 285758    | A_33_P3867584  | 1.03 ± 1.02  | 1.33 |
| <b>PRR35</b>        | proline rich 35                                                     | 146325    | A_33_P3420633  | -1.03 ± 0.96 | 1.45 |
| <b>SEC62</b>        | SEC62 homolog (S. cerevisiae)                                       | 7095      | A_23_P357860   | 1.03 ± 0.96  | 1.45 |
| <b>SOCS1</b>        | suppressor of cytokine signaling 1                                  | 8651      | A_23_P420196   | -1.03 ± 0.89 | 1.61 |
| <b>IGLL5</b>        | immunoglobulin lambda-like polypeptide 5                            | 100423062 | A_33_P3379039  | -1.03 ± 0.80 | 1.85 |
| <b>TET3</b>         | tet methylcytosine dioxygenase 3                                    | 200424    | A_22_P00015990 | -1.03 ± 0.66 | 2.46 |
| <b>SCRG1</b>        | stimulator of chondrogenesis 1                                      | 11341     | A_23_P167159   | -1.02 ± 2.12 | 0.48 |
| <b>ERN2</b>         | endoplasmic reticulum to nucleus signaling 2                        | 10595     | A_33_P3213645  | -1.02 ± 1.54 | 0.74 |
| <b>VSIG1</b>        | V-set and immunoglobulin domain containing 1                        | 340547    | A_32_P163147   | 1.02 ± 1.46  | 0.79 |
| <b>KRT13</b>        | keratin 13, type I                                                  | 3860      | A_24_P228149   | -1.02 ± 1.38 | 0.85 |
| <b>HSPA12B</b>      | heat shock 70kD protein 12B                                         | 116835    | A_23_P91334    | 1.02 ± 1.19  | 1.04 |
| <b>FAM162B</b>      | family with sequence similarity 162, member B                       | 221303    | A_23_P145054   | 1.02 ± 1.12  | 1.13 |
| <b>KDR</b>          | kinase insert domain receptor (a type III receptor tyrosine kinase) | 3791      | A_24_P71973    | 1.02 ± 1.10  | 1.18 |
| <b>METTL7B</b>      | methyltransferase like 7B                                           | 196410    | A_24_P64653    | -1.02 ± 1.01 | 1.31 |
| <b>GPR19</b>        | G protein-coupled receptor 19                                       | 2842      | A_33_P3236813  | -1.02 ± 0.95 | 1.44 |
| <b>TNRC18</b>       | trinucleotide repeat containing 18                                  | 84629     | A_33_P3321507  | -1.02 ± 0.90 | 1.57 |
| <b>GABRB3</b>       | gamma-aminobutyric acid (GABA) A receptor, beta 3                   | 2562      | A_33_P3277075  | 1.02 ± 0.87  | 1.64 |
| <b>SUV39H2</b>      | suppressor of variegation 3-9 homolog 2 (Drosophila)                | 79723     | A_23_P202392   | -1.02 ± 0.85 | 1.69 |
| <b>LOC286178</b>    | uncharacterized LOC286178                                           | 286178    | A_22_P00006024 | -1.02 ± 0.85 | 1.69 |
| <b>RASL10B</b>      | RAS-like, family 10, member B                                       | 91608     | A_24_P322229   | 1.02 ± 0.85  | 1.69 |
| <b>GPM6A</b>        | glycoprotein M6A                                                    | 2823      | A_23_P121545   | 1.02 ± 0.84  | 1.70 |
| <b>FLJ41200</b>     | uncharacterized LOC401492                                           | 401492    | A_33_P3266739  | -1.02 ± 0.82 | 1.80 |

|                    |                                                                                   |        |               |              |      |
|--------------------|-----------------------------------------------------------------------------------|--------|---------------|--------------|------|
| <b>PDK1</b>        | pyruvate dehydrogenase kinase, isozyme 1                                          | 5163   | A_24_P37441   | -1.02 ± 0.79 | 1.88 |
| <b>SLC39A3</b>     | solute carrier family 39 (zinc transporter), member 3                             | 29985  | A_24_P382467  | -1.02 ± 0.75 | 1.99 |
| <b>LRAT</b>        | lecithin retinol acyltransferase (phosphatidylcholine--retinol O-acyltransferase) | 9227   | A_32_P113066  | 1.02 ± 0.55  | 3.10 |
| <b>GSTT2B</b>      | glutathione S-transferase theta 2B (gene/pseudogene)                              | 653689 | A_33_P3289045 | 1.01 ± 1.82  | 0.58 |
| <b>ALDH1L1</b>     | aldehyde dehydrogenase 1 family, member L1                                        | 10840  | A_23_P258887  | -1.01 ± 1.55 | 0.72 |
| <b>CLDN2</b>       | claudin 2                                                                         | 9075   | A_33_P3249046 | 1.01 ± 1.39  | 0.83 |
| <b>CCNO</b>        | cyclin O                                                                          | 10309  | A_23_P92860   | -1.01 ± 1.34 | 0.87 |
| <b>KRT15</b>       | keratin 15, type I                                                                | 3866   | A_23_P27133   | -1.01 ± 1.22 | 1.00 |
| <b>CEMIP</b>       | cell migration inducing protein, hyaluronan binding                               | 57214  | A_23_P324754  | -1.01 ± 1.17 | 1.06 |
| <b>SLC16A6</b>     | solute carrier family 16, member 6                                                | 9120   | A_23_P152791  | -1.01 ± 1.13 | 1.11 |
| <b>SIGLEC12</b>    | sialic acid binding Ig-like lectin 12 (gene/pseudogene)                           | 89858  | A_23_P164596  | -1.01 ± 1.11 | 1.13 |
| <b>FAM189A1</b>    | family with sequence similarity 189, member A1                                    | 23359  | A_32_P143000  | 1.01 ± 1.07  | 1.20 |
| <b>ZNF155</b>      | zinc finger protein 155                                                           | 7711   | A_24_P301629  | -1.01 ± 0.96 | 1.40 |
| <b>DHRS2</b>       | dehydrogenase/reductase (SDR family) member 2                                     | 10202  | A_23_P321501  | 1.01 ± 0.94  | 1.45 |
| <b>CPNE9</b>       | copine family member IX                                                           | 151835 | A_23_P57829   | 1.01 ± 0.88  | 1.57 |
| <b>MEIS3</b>       | Meis homeobox 3                                                                   | 56917  | A_23_P78795   | -1.01 ± 0.85 | 1.65 |
| <b>FLNC</b>        | filamin C, gamma                                                                  | 2318   | A_21_P0013349 | -1.01 ± 0.81 | 1.78 |
| <b>C8orf37-AS1</b> | C8orf37 antisense RNA 1                                                           |        | A_21_P0000720 | 1.01 ± 0.77  | 1.92 |
| <b>OR5A1</b>       | olfactory receptor, family 5, subfamily A, member 1                               | 219982 | A_23_P75764   | -1.01 ± 0.71 | 2.13 |
| <b>SNORD116-28</b> | small nucleolar RNA, C/D box 116-28                                               |        | A_21_P0000455 | 1.01 ± 0.70  | 2.16 |
| <b>GYPE</b>        | glycophorin E (MNS blood group)                                                   | 2996   | A_23_P41304   | 1.01 ± 0.63  | 2.57 |
| <b>TM4SF19</b>     | transmembrane 4 L six family member 19                                            | 116211 | A_23_P372946  | -1.00 ± 1.54 | 0.72 |
| <b>SNX22</b>       | sorting nexin 22                                                                  | 79856  | A_33_P3212172 | 1.00 ± 1.44  | 0.79 |
| <b>AREG</b>        | amphiregulin                                                                      | 374    | A_23_P259071  | -1.00 ± 1.38 | 0.83 |
| <b>UCHL1</b>       | ubiquitin carboxyl-terminal esterase L1 (ubiquitin thiolesterase)                 | 7345   | A_23_P132956  | -1.00 ± 1.24 | 0.96 |

|                     |                                                 |           |                |              |      |
|---------------------|-------------------------------------------------|-----------|----------------|--------------|------|
| <b>AXDND1</b>       | axonemal dynein light chain domain containing 1 | 126859    | A_23_P356425   | 1.00 ± 1.07  | 1.18 |
| <b>TYRP1</b>        | tyrosinase-related protein 1                    | 7306      | A_23_P94403    | 1.00 ± 1.03  | 1.25 |
| <b>LINC00861</b>    | lincRNA 861                                     | 100130231 | A_21_P0000807  | -1.00 ± 0.99 | 1.33 |
| <b>GBP4</b>         | guanylate binding protein 4                     | 115361    | A_24_P45446    | 1.00 ± 0.91  | 1.50 |
| <b>LHFPL3-AS1</b>   | LHFPL3 antisense RNA 1                          | 645591    | A_32_P394491   | 1.00 ± 0.86  | 1.63 |
| <b>SPATA13-AS1</b>  | SPATA13 antisense RNA 1                         | 100874231 | A_22_P00023937 | 1.00 ± 0.83  | 1.71 |
| <b>LRRC52</b>       | leucine rich repeat containing 52               | 440699    | A_33_P3292043  | 1.00 ± 0.81  | 1.77 |
| <b>EMP2</b>         | epithelial membrane protein 2                   | 2013      | A_23_P106682   | 1.00 ± 0.71  | 2.11 |
| <b>LOC101928445</b> | uncharacterized LOC101928445                    | 101928445 | A_22_P00007787 | -1.00 ± 0.70 | 2.17 |
| <b>ZNF230</b>       | zinc finger protein 230                         | 7773      | A_24_P370096   | -1.00 ± 0.64 | 2.48 |

**Supplementary Table S3.** Annotated genes regulated in the lung fibroblast samples after pirfenidone treatment.

| GENE SYMBOL     | GENE NAME                                                                           | ENTREZ ID | SPOT ID        | mean log <sub>2</sub> (fold-change) ± the half width of the 95% confidence interval | -log <sub>10</sub> (P-value) |
|-----------------|-------------------------------------------------------------------------------------|-----------|----------------|-------------------------------------------------------------------------------------|------------------------------|
| <b>NPTX1</b>    | neuronal pentraxin I                                                                | 4884      | A_23_P124905   | 3.60 ± 1.88                                                                         | 3.23                         |
| <b>SLC14A1</b>  | solute carrier family 14 (urea transporter), member 1 (Kidd blood group)            | 6563      | A_23_P55616    | 2.93 ± 1.47                                                                         | 3.42                         |
| <b>SULF2</b>    | sulfatase 2                                                                         | 55959     | A_23_P154605   | -2.58 ± 1.41                                                                        | 3.03                         |
| <b>HLA-DMB</b>  | major histocompatibility complex, class II, DM beta                                 | 3109      | A_32_P351968   | 2.36 ± 1.15                                                                         | 3.56                         |
| <b>SCRG1</b>    | stimulator of chondrogenesis 1                                                      | 11341     | A_23_P167159   | -2.35 ± 1.79                                                                        | 1.92                         |
| <b>HOXC8</b>    | homeobox C8                                                                         | 3224      | A_24_P124558   | -2.35 ± 1.05                                                                        | 3.98                         |
| <b>CFI</b>      | complement factor I                                                                 | 3426      | A_23_P7212     | -2.29 ± 1.58                                                                        | 2.20                         |
| <b>CCL18</b>    | chemokine (C-C motif) ligand 18 (pulmonary and activation-regulated)                | 6362      | A_23_P55270    | 2.17 ± 2.46                                                                         | 1.09                         |
| <b>MYH2</b>     | myosin, heavy chain 2, skeletal muscle, adult                                       | 4620      | A_23_P38271    | -2.13 ± 1.93                                                                        | 1.49                         |
| <b>HOXC9</b>    | homeobox C9                                                                         | 3225      | A_23_P25150    | -2.09 ± 1.31                                                                        | 2.53                         |
| <b>FOXQ1</b>    | forkhead box Q1                                                                     | 94234     | A_32_P164246   | 2.08 ± 1.69                                                                         | 1.75                         |
| <b>XIST</b>     | X inactive specific transcript (non-protein coding)                                 | 7503      | A_19_P00323692 | 2.03 ± 3.54                                                                         | 0.61                         |
| <b>TENM2</b>    | teneurin transmembrane protein 2                                                    | 57451     | A_24_P299474   | -2.02 ± 1.98                                                                        | 1.34                         |
| <b>AGT</b>      | angiotensinogen (serpin peptidase inhibitor, clade A, member 8)                     | 183       | A_23_P115261   | -1.99 ± 1.79                                                                        | 1.52                         |
| <b>SERPINA3</b> | serpin peptidase inhibitor, clade A (alpha-1 antiproteinase, antitrypsin), member 3 | 12        | A_33_P3399788  | -1.96 ± 1.35                                                                        | 2.20                         |
| <b>PTGIS</b>    | prostaglandin I <sub>2</sub> (prostacyclin) synthase                                | 5740      | A_24_P48723    | -1.96 ± 1.34                                                                        | 2.24                         |
| <b>FRAS1</b>    | Fraser extracellular matrix complex subunit 1                                       | 80144     | A_32_P107876   | -1.96 ± 1.32                                                                        | 2.27                         |
| <b>SFRP4</b>    | secreted frizzled-related protein 4                                                 | 6424      | A_21_P0011967  | -1.96 ± 1.30                                                                        | 2.33                         |
| <b>POSTN</b>    | periostin, osteoblast specific factor                                               | 10631     | A_33_P3511265  | -1.93 ± 1.78                                                                        | 1.46                         |
| <b>TNNT2</b>    | troponin T type 2 (cardiac)                                                         | 7139      | A_23_P34700    | -1.93 ± 1.43                                                                        | 2.00                         |
| <b>SULF1</b>    | sulfatase 1                                                                         | 23213     | A_23_P43164    | -1.91 ± 1.45                                                                        | 1.92                         |
| <b>SGCG</b>     | sarcoglycan, gamma (35kDa dystrophin-associated glycoprotein)                       | 6445      | A_23_P423237   | -1.91 ± 1.44                                                                        | 1.93                         |

|                  |                                                                                     |        |               |              |      |
|------------------|-------------------------------------------------------------------------------------|--------|---------------|--------------|------|
| <b>KCND2</b>     | potassium channel, voltage gated Shal related subfamily D, member 2                 | 3751   | A_23_P259251  | -1.91 ± 1.04 | 3.08 |
| <b>CPZ</b>       | carboxypeptidase Z                                                                  | 8532   | A_23_P58251   | -1.86 ± 1.34 | 2.07 |
| <b>LPXN</b>      | leupaxin                                                                            | 9404   | A_23_P87150   | 1.86 ± 0.98  | 3.21 |
| <b>FBLN2</b>     | fibulin 2                                                                           | 2199   | A_23_P143981  | -1.85 ± 1.19 | 2.41 |
| <b>BEX2</b>      | brain expressed X-linked 2                                                          | 84707  | A_33_P3245178 | -1.85 ± 1.16 | 2.52 |
| <b>ITIH3</b>     | inter-alpha-trypsin inhibitor heavy chain 3                                         | 3699   | A_33_P3313145 | -1.83 ± 0.78 | 4.24 |
| <b>SETBP1</b>    | SET binding protein 1                                                               | 26040  | A_23_P4551    | -1.83 ± 0.71 | 4.77 |
| <b>CFD</b>       | complement factor D (adipsin)                                                       | 1675   | A_23_P119562  | -1.81 ± 1.18 | 2.40 |
| <b>LOC284561</b> | uncharacterized LOC284561                                                           |        | A_33_P3672756 | -1.81 ± 1.12 | 2.54 |
| <b>GSTM4</b>     | glutathione S-transferase mu 4                                                      | 2948   | A_23_P217917  | 1.81 ± 0.97  | 3.13 |
| <b>SPON1</b>     | spondin 1, extracellular matrix protein                                             | 10418  | A_32_P133072  | -1.80 ± 1.22 | 2.26 |
| <b>B3GALT2</b>   | UDP-Gal:betaGlcNAc beta 1,3-galactosyltransferase, polypeptide 2                    | 8707   | A_33_P3286958 | -1.79 ± 1.37 | 1.89 |
| <b>CTTNBP2</b>   | cortactin binding protein 2                                                         | 83992  | A_23_P215744  | 1.79 ± 1.09  | 2.64 |
| <b>DDX3Y</b>     | DEAD (Asp-Glu-Ala-Asp) box helicase 3, Y-linked                                     | 8653   | A_33_P3224331 | -1.78 ± 2.63 | 0.75 |
| <b>TNFSF4</b>    | tumor necrosis factor (ligand) superfamily, member 4                                | 7292   | A_23_P126836  | -1.78 ± 1.74 | 1.35 |
| <b>KLHDC7B</b>   | kelch domain containing 7B                                                          | 113730 | A_24_P117410  | -1.78 ± 0.87 | 3.52 |
| <b>ABCA6</b>     | ATP-binding cassette, sub-family A (ABC1), member 6                                 | 23460  | A_23_P500400  | -1.77 ± 1.43 | 1.77 |
| <b>EPB41L4B</b>  | erythrocyte membrane protein band 4.1 like 4B                                       | 54566  | A_23_P216556  | 1.76 ± 1.00  | 2.87 |
| <b>PLXDC2</b>    | plexin domain containing 2                                                          | 84898  | A_23_P161424  | -1.76 ± 0.92 | 3.23 |
| <b>PKP2</b>      | plakophilin 2                                                                       | 5318   | A_33_P3405728 | -1.75 ± 1.07 | 2.62 |
| <b>APBB1IP</b>   | amyloid beta (A4) precursor protein-binding, family B, member 1 interacting protein | 54518  | A_23_P401700  | -1.75 ± 0.88 | 3.41 |
| <b>CCND2</b>     | cyclin D2                                                                           | 894    | A_24_P278747  | -1.74 ± 1.25 | 2.08 |
| <b>MEST</b>      | mesoderm specific transcript                                                        |        | A_23_P156970  | -1.72 ± 1.40 | 1.73 |
| <b>RARRES2</b>   | retinoic acid receptor responder (tazarotene induced) 2                             | 5919   | A_23_P134237  | -1.71 ± 1.55 | 1.50 |
| <b>FMOD</b>      | fibromodulin                                                                        | 2331   | A_23_P114883  | -1.71 ± 0.79 | 3.81 |
| <b>ARHGAP26</b>  | Rho GTPase activating protein 26                                                    | 23092  | A_33_P3228305 | -1.69 ± 1.11 | 2.35 |



|                     |                                                               |           |                |              |      |
|---------------------|---------------------------------------------------------------|-----------|----------------|--------------|------|
| <b>SHC2</b>         | SHC (Src homology 2 domain containing) transforming protein 2 | 25759     | A_32_P205624   | -1.69 ± 1.01 | 2.69 |
| <b>HOXC6</b>        | homeobox C6                                                   | 3223      | A_33_P3300965  | -1.62 ± 1.37 | 1.65 |
| <b>SLC51B</b>       | solute carrier family 51, beta subunit                        | 123264    | A_23_P436284   | 1.62 ± 1.36  | 1.67 |
| <b>KLHL13</b>       | kelch-like family member 13                                   | 90293     | A_23_P159974   | 1.62 ± 0.88  | 3.09 |
| <b>ALDH1A1</b>      | aldehyde dehydrogenase 1 family, member A1                    | 216       | A_23_P83098    | -1.61 ± 1.58 | 1.34 |
| <b>LINC00312</b>    | lincRNA 312                                                   |           | A_23_P166779   | -1.61 ± 0.90 | 2.98 |
| <b>LINC01444</b>    | lincRNA 1444                                                  | 101927642 | A_22_P00012170 | 1.60 ± 1.24  | 1.87 |
| <b>SCG2</b>         | secretogranin II                                              | 7857      | A_24_P88696    | -1.60 ± 1.20 | 1.97 |
| <b>AKR1C8P</b>      | aldo-keto reductase family 1, member C8, pseudogene           | 340811    | A_21_P0010854  | 1.60 ± 1.02  | 2.47 |
| <b>LRRD1</b>        | leucine-rich repeats and death domain containing 1            | 401387    | A_33_P3420446  | 1.59 ± 1.95  | 0.98 |
| <b>KRT18</b>        | keratin 18, type I                                            | 3875      | A_32_P151544   | -1.59 ± 1.84 | 1.06 |
| <b>TCF7</b>         | transcription factor 7 (T-cell specific, HMG-box)             | 6932      | A_23_P7582     | 1.59 ± 0.88  | 2.99 |
| <b>LAMP3</b>        | lysosomal-associated membrane protein 3                       | 27074     | A_23_P29773    | -1.58 ± 1.62 | 1.25 |
| <b>C10orf99</b>     | chromosome 10 open reading frame 99                           | 387695    | A_33_P3392405  | -1.58 ± 1.46 | 1.46 |
| <b>LOC102725254</b> | uncharacterized LOC102725254                                  |           | A_22_P00010091 | 1.58 ± 1.02  | 2.42 |
| <b>MIR503HG</b>     | MIR503 host gene (non-protein coding)                         | 84848     | A_33_P3402329  | -1.58 ± 0.94 | 2.71 |
| <b>CD52</b>         | CD52 molecule                                                 | 1043      | A_23_P85800    | 1.57 ± 2.09  | 0.87 |
| <b>GMFG</b>         | glia maturation factor, gamma                                 | 9535      | A_23_P208866   | 1.57 ± 0.76  | 3.58 |
| <b>OAS2</b>         | 2'-5'-oligoadenylate synthetase 2, 69/71kDa                   | 4939      | A_33_P3225522  | 1.57 ± 0.48  | 6.26 |
| <b>GPR133</b>       | G protein-coupled receptor 133                                | 283383    | A_23_P415706   | -1.56 ± 0.99 | 2.49 |
| <b>LINC01503</b>    | lincRNA 1503                                                  | 100506119 | A_19_P00319981 | -1.56 ± 0.92 | 2.72 |
| <b>NT5E</b>         | 5'-nucleotidase, ecto (CD73)                                  | 4907      | A_24_P354715   | 1.56 ± 0.75  | 3.62 |
| <b>PTPN3</b>        | protein tyrosine phosphatase, non-receptor type 3             | 5774      | A_22_P00025093 | 1.56 ± 0.64  | 4.46 |
| <b>WBSCR27</b>      | Williams Beuren syndrome chromosome region 27                 | 155368    | A_23_P381017   | 1.55 ± 1.41  | 1.49 |
| <b>FAM20A</b>       | family with sequence similarity 20, member A                  | 54757     | A_32_P108254   | -1.55 ± 1.16 | 1.96 |
| <b>PKIB</b>         | protein kinase (cAMP-dependent, catalytic) inhibitor beta     | 5570      | A_23_P145529   | -1.54 ± 0.97 | 2.50 |
| <b>CHI3L1</b>       | chitinase 3-like 1 (cartilage glycoprotein-39)                | 1116      | A_23_P137665   | -1.53 ± 1.55 | 1.27 |
| <b>CREB5</b>        | cAMP responsive element binding protein 5                     | 9586      | A_23_P157117   | 1.52 ± 0.83  | 3.06 |

|                   |                                                                                               |        |               |              |      |
|-------------------|-----------------------------------------------------------------------------------------------|--------|---------------|--------------|------|
| <b>NDUFA4L2</b>   | NADH dehydrogenase (ubiquinone) 1 alpha subcomplex, 4-like 2                                  | 56901  | A_23_P9614    | -1.51 ± 1.16 | 1.88 |
| <b>COL5A1</b>     | collagen, type V, alpha 1                                                                     | 1289   | A_33_P3629678 | -1.51 ± 1.09 | 2.07 |
| <b>CSTA</b>       | cystatin A (stefin A)                                                                         | 1475   | A_23_P41114   | -1.51 ± 0.99 | 2.36 |
| <b>LAMP5</b>      | lysosomal-associated membrane protein family, member 5                                        | 24141  | A_23_P40295   | 1.50 ± 2.09  | 0.82 |
| <b>IGSF10</b>     | immunoglobulin superfamily, member 10                                                         | 285313 | A_23_P333683  | -1.50 ± 1.23 | 1.72 |
| <b>NUAK1</b>      | NUAK family, SNF1-like kinase, 1                                                              | 9891   | A_23_P348257  | -1.50 ± 1.16 | 1.87 |
| <b>KIF26B</b>     | kinesin family member 26B                                                                     | 55083  | A_33_P3382565 | -1.50 ± 1.07 | 2.12 |
| <b>SERPINE2</b>   | serpin peptidase inhibitor, clade E (nexin, plasminogen activator inhibitor type 1), member 2 | 5270   | A_23_P50919   | -1.49 ± 1.31 | 1.56 |
| <b>LIPG</b>       | lipase, endothelial                                                                           | 9388   | A_24_P125469  | -1.49 ± 1.03 | 2.18 |
| <b>CLIC6</b>      | chloride intracellular channel 6                                                              | 54102  | A_23_P385067  | 1.49 ± 1.00  | 2.31 |
| <b>PCOLCE2</b>    | procollagen C-endopeptidase enhancer 2                                                        | 26577  | A_23_P57709   | 1.48 ± 1.43  | 1.35 |
| <b>KRT83</b>      | keratin 83, type II                                                                           | 3889   | A_33_P3273552 | -1.48 ± 1.30 | 1.55 |
| <b>MGP</b>        | matrix Gla protein                                                                            | 4256   | A_33_P3361636 | -1.48 ± 1.06 | 2.08 |
| <b>CCDC80</b>     | coiled-coil domain containing 80                                                              | 151887 | A_23_P58082   | -1.48 ± 0.85 | 2.86 |
| <b>SLC37A2</b>    | solute carrier family 37 (glucose-6-phosphate transporter), member 2                          | 219855 | A_33_P3474319 | 1.48 ± 0.73  | 3.49 |
| <b>FOSB</b>       | FBJ murine osteosarcoma viral oncogene homolog B                                              | 2354   | A_23_P429998  | 1.47 ± 1.43  | 1.36 |
| <b>TPD52L1</b>    | tumor protein D52-like 1                                                                      | 7164   | A_23_P31143   | -1.47 ± 1.16 | 1.82 |
| <b>GPM6B</b>      | glycoprotein M6B                                                                              | 2824   | A_23_P378416  | 1.47 ± 1.14  | 1.86 |
| <b>DHRS3</b>      | dehydrogenase/reductase (SDR family) member 3                                                 | 9249   | A_23_P33759   | -1.47 ± 0.99 | 2.30 |
| <b>FAM64A</b>     | family with sequence similarity 64, member A                                                  | 54478  | A_33_P3276918 | 1.47 ± 0.88  | 2.68 |
| <b>SUSD3</b>      | sushi domain containing 3                                                                     | 203328 | A_23_P401076  | 1.47 ± 0.88  | 2.67 |
| <b>CDKN2A-AS1</b> | CDKN2A antisense RNA 1 (head to head)                                                         |        | A_23_P307502  | -1.47 ± 0.78 | 3.18 |
| <b>KRT18P55</b>   | keratin 18 pseudogene 55                                                                      | 284085 | A_23_P373708  | -1.46 ± 2.06 | 0.80 |
| <b>PRSS36</b>     | protease, serine, 36                                                                          | 146547 | A_24_P412734  | 1.46 ± 1.89  | 0.91 |
| <b>CACNG7</b>     | calcium channel, voltage-dependent, gamma subunit 7                                           | 59284  | A_24_P365349  | -1.46 ± 1.81 | 0.96 |
| <b>ITGA11</b>     | integrin, alpha 11                                                                            | 22801  | A_23_P206022  | -1.46 ± 1.60 | 1.14 |
| <b>FBLN1</b>      | fibulin 1                                                                                     | 2192   | A_23_P211631  | -1.46 ± 1.14 | 1.84 |

|                  |                                                             |           |                |              |      |
|------------------|-------------------------------------------------------------|-----------|----------------|--------------|------|
| <b>CDC25C</b>    | cell division cycle 25C                                     | 995       | A_23_P70249    | 1.46 ± 1.12  | 1.90 |
| <b>ISLR</b>      | immunoglobulin superfamily containing leucine-rich repeat   | 3671      | A_23_P3312     | -1.46 ± 1.02 | 2.18 |
| <b>KIF20A</b>    | kinesin family member 20A                                   | 10112     | A_23_P256956   | 1.46 ± 0.86  | 2.75 |
| <b>MAOB</b>      | monoamine oxidase B                                         | 4129      | A_23_P85015    | 1.46 ± 0.81  | 2.97 |
| <b>MMP3</b>      | matrix metalloproteinase 3 (stromelysin 1, progelatinase)   | 4314      | A_23_P161698   | 1.45 ± 1.80  | 0.96 |
| <b>COL3A1</b>    | collagen, type III, alpha 1                                 | 1281      | A_24_P935491   | -1.45 ± 1.26 | 1.60 |
| <b>EYA2</b>      | EYA transcriptional coactivator and phosphatase 2           | 2139      | A_23_P319859   | 1.45 ± 1.23  | 1.63 |
| <b>CPE</b>       | carboxypeptidase E                                          | 1363      | A_23_P259442   | -1.45 ± 1.18 | 1.75 |
| <b>GACAT2</b>    | gastric cancer associated transcript 2 (non-protein coding) | 100287082 | A_21_P0014365  | 1.45 ± 0.84  | 2.82 |
| <b>DSP</b>       | desmoplakin                                                 | 1832      | A_32_P157945   | -1.44 ± 1.86 | 0.90 |
| <b>SLIT3</b>     | slit homolog 3 (Drosophila)                                 | 6586      | A_23_P58588    | -1.44 ± 0.91 | 2.48 |
| <b>GSTT2B</b>    | glutathione S-transferase theta 2B (gene/pseudogene)        | 653689    | A_33_P3289045  | 1.43 ± 1.54  | 1.18 |
| <b>S100A3</b>    | S100 calcium binding protein A3                             | 6274      | A_23_P104073   | 1.43 ± 0.80  | 2.95 |
| <b>KRTAP19-2</b> | keratin associated protein 19-2                             | 337969    | A_33_P3311267  | 1.42 ± 1.87  | 0.88 |
| <b>SOX11</b>     | SRY (sex determining region Y)-box 11                       | 6664      | A_24_P302584   | 1.42 ± 1.21  | 1.64 |
| <b>NCAM2</b>     | neural cell adhesion molecule 2                             | 4685      | A_33_P3239884  | -1.42 ± 1.20 | 1.65 |
| <b>ADM2</b>      | adrenomedullin 2                                            | 79924     | A_33_P3413905  | -1.42 ± 1.12 | 1.84 |
| <b>ADAMTS10</b>  | ADAM metalloproteinase with thrombospondin type 1 motif, 10 | 81794     | A_33_P3223056  | -1.42 ± 0.93 | 2.35 |
| <b>THAP10</b>    | THAP domain containing 10                                   | 56906     | A_23_P106391   | 1.42 ± 0.89  | 2.53 |
| <b>ERICH2</b>    | glutamate-rich 2                                            |           | A_32_P197340   | -1.41 ± 1.31 | 1.45 |
| <b>AEBP1</b>     | AE binding protein 1                                        | 165       | A_23_P157299   | -1.41 ± 0.90 | 2.45 |
| <b>TSPO2</b>     | translocator protein 2                                      | 222642    | A_33_P3234222  | -1.41 ± 0.87 | 2.59 |
| <b>RASL12</b>    | RAS-like, family 12                                         | 51285     | A_24_P150580   | 1.40 ± 1.51  | 1.17 |
| <b>KCTD16</b>    | potassium channel tetramerization domain containing 16      | 57528     | A_24_P409800   | -1.40 ± 1.46 | 1.23 |
| <b>ADRB2</b>     | adrenoceptor beta 2, surface                                | 154       | A_23_P145024   | 1.40 ± 1.18  | 1.66 |
| <b>FOXC2-AS1</b> | FOXC2 antisense RNA 1                                       | 103752587 | A_22_P00010265 | 1.40 ± 0.88  | 2.50 |

|                 |                                                                     |        |                |              |      |
|-----------------|---------------------------------------------------------------------|--------|----------------|--------------|------|
| <b>TTY15</b>    | testis-specific transcript, Y-linked 15 (non-protein coding)        | 64595  | A_21_P0006594  | -1.39 ± 2.39 | 0.62 |
| <b>SEL1L2</b>   | sel-1 suppressor of lin-12-like 2 (C. elegans)                      | 80343  | A_33_P3283430  | -1.39 ± 1.59 | 1.08 |
| <b>KIF15</b>    | kinesin family member 15                                            | 56992  | A_23_P80902    | 1.39 ± 0.86  | 2.58 |
| <b>ALDH1L2</b>  | aldehyde dehydrogenase 1 family, member L2                          | 160428 | A_33_P3282634  | -1.39 ± 0.80 | 2.84 |
| <b>RIMBP3</b>   | RIMS binding protein 3                                              | 85376  | A_23_P154962   | 1.39 ± 0.57  | 4.45 |
| <b>CDC20</b>    | cell division cycle 20                                              | 991    | A_23_P149200   | 1.38 ± 0.86  | 2.54 |
| <b>CDKN3</b>    | cyclin-dependent kinase inhibitor 3                                 | 1033   | A_23_P48669    | 1.38 ± 0.81  | 2.76 |
| <b>FSTL3</b>    | follicle-stimulating-like 3 (secreted glycoprotein)                 | 10272  | A_33_P3318796  | -1.38 ± 0.80 | 2.80 |
| <b>SCARNA20</b> | small Cajal body-specific RNA 20                                    | 677681 | A_21_P0000350  | 1.37 ± 1.59  | 1.05 |
| <b>RHOJ</b>     | ras homolog family member J                                         | 57381  | A_24_P82032    | -1.37 ± 1.13 | 1.70 |
| <b>EDN1</b>     | endothelin 1                                                        | 1906   | A_23_P214821   | -1.37 ± 1.09 | 1.80 |
| <b>RBP1</b>     | retinol binding protein 1, cellular                                 | 5947   | A_23_P257649   | -1.37 ± 1.07 | 1.85 |
| <b>NXPH4</b>    | neurexophilin 4                                                     | 11247  | A_33_P3363245  | -1.37 ± 0.97 | 2.13 |
| <b>DEPDC1B</b>  | DEP domain containing 1B                                            | 55789  | A_23_P361419   | 1.37 ± 0.94  | 2.21 |
| <b>DLEU2</b>    | deleted in lymphocytic leukemia 2 (non-protein coding)              |        | A_22_P00015351 | 1.37 ± 0.87  | 2.49 |
| <b>ARHGDI1B</b> | Rho GDP dissociation inhibitor (GDI) beta                           | 397    | A_23_P151075   | 1.37 ± 0.86  | 2.51 |
| <b>RIBC2</b>    | RIB43A domain with coiled-coils 2                                   | 26150  | A_23_P166526   | 1.35 ± 1.22  | 1.51 |
| <b>ELOVL2</b>   | ELOVL fatty acid elongase 2                                         | 54898  | A_33_P3231739  | 1.35 ± 0.81  | 2.69 |
| <b>CEND1</b>    | cell cycle exit and neuronal differentiation 1                      | 51286  | A_33_P3323945  | 1.35 ± 0.81  | 2.66 |
| <b>ULBP1</b>    | UL16 binding protein 1                                              | 80329  | A_33_P3422802  | -1.34 ± 1.48 | 1.14 |
| <b>KCNA3</b>    | potassium voltage-gated channel, shaker-related subfamily, member 3 | 3738   | A_33_P3415032  | 1.34 ± 1.02  | 1.92 |
| <b>CENPA</b>    | centromere protein A                                                | 1058   | A_24_P413884   | 1.34 ± 1.00  | 1.97 |
| <b>GPR56</b>    | G protein-coupled receptor 56                                       | 9289   | A_23_P206280   | 1.34 ± 0.85  | 2.47 |
| <b>AMPH</b>     | amphiphysin                                                         | 273    | A_23_P31273    | 1.34 ± 0.76  | 2.88 |
| <b>OGN</b>      | osteoglycin                                                         | 4969   | A_23_P82990    | -1.33 ± 1.29 | 1.36 |
| <b>MMP7</b>     | matrix metalloproteinase 7 (matrilysin, uterine)                    | 4316   | A_23_P52761    | 1.32 ± 1.92  | 0.77 |
| <b>MFAP5</b>    | microfibrillar associated protein 5                                 | 8076   | A_33_P3708413  | -1.32 ± 1.69 | 0.92 |
| <b>CXCL8</b>    | chemokine (C-X-C motif) ligand 8                                    | 3576   | A_32_P87013    | 1.32 ± 1.28  | 1.36 |

|                     |                                                                                        |           |                |              |      |
|---------------------|----------------------------------------------------------------------------------------|-----------|----------------|--------------|------|
| <b>KCNE3</b>        | potassium channel, voltage gated subfamily E regulatory beta subunit 3                 | 10008     | A_23_P24948    | -1.32 ± 0.77 | 2.78 |
| <b>GPR128</b>       | G protein-coupled receptor 128                                                         | 84873     | A_23_P40919    | 1.31 ± 1.88  | 0.78 |
| <b>SCN4B</b>        | sodium channel, voltage gated, type IV beta subunit                                    | 6330      | A_23_P303833   | 1.31 ± 1.44  | 1.14 |
| <b>GRB14</b>        | growth factor receptor-bound protein 14                                                | 2888      | A_23_P154526   | 1.31 ± 1.18  | 1.51 |
| <b>TBX2-AS1</b>     | TBX2 antisense RNA 1                                                                   | 103689912 | A_24_P896205   | 1.31 ± 1.05  | 1.78 |
| <b>LOC101928143</b> | uncharacterized LOC101928143                                                           |           | A_21_P0008460  | 1.31 ± 0.96  | 2.01 |
| <b>SEMA3A</b>       | sema domain, immunoglobulin domain (Ig), short basic domain, secreted, (semaphorin) 3A | 10371     | A_24_P192301   | 1.31 ± 0.94  | 2.08 |
| <b>STRIP2</b>       | striatin interacting protein 2                                                         | 57464     | A_32_P213831   | 1.31 ± 0.74  | 2.91 |
| <b>C16orf46</b>     | chromosome 16 open reading frame 46                                                    | 123775    | A_22_P00002490 | -1.30 ± 1.40 | 1.17 |
| <b>TMEM35</b>       | transmembrane protein 35                                                               | 59353     | A_23_P45324    | 1.30 ± 1.34  | 1.24 |
| <b>RGS17</b>        | regulator of G-protein signaling 17                                                    | 26575     | A_23_P156861   | 1.30 ± 0.99  | 1.92 |
| <b>PALMD</b>        | palmdelphin                                                                            | 54873     | A_23_P23669    | 1.30 ± 0.81  | 2.55 |
| <b>NR3C2</b>        | nuclear receptor subfamily 3, group C, member 2                                        | 4306      | A_23_P392470   | 1.30 ± 0.74  | 2.87 |
| <b>RPS4Y2</b>       | ribosomal protein S4, Y-linked 2                                                       | 140032    | A_23_P324384   | -1.29 ± 4.12 | 0.28 |
| <b>HOPX</b>         | HOP homeobox                                                                           | 84525     | A_23_P254507   | 1.29 ± 1.50  | 1.05 |
| <b>WWC2-AS2</b>     | WWC2 antisense RNA 2                                                                   | 152641    | A_24_P354496   | 1.29 ± 0.91  | 2.15 |
| <b>WDFY4</b>        | WDFY family member 4                                                                   | 57705     | A_32_P30905    | 1.29 ± 0.89  | 2.20 |
| <b>HBD</b>          | hemoglobin, delta                                                                      | 3045      | A_24_P75190    | -1.28 ± 1.57 | 0.98 |
| <b>MFAP4</b>        | microfibrillar-associated protein 4                                                    | 4239      | A_23_P164057   | -1.28 ± 1.13 | 1.55 |
| <b>THBS2</b>        | thrombospondin 2                                                                       | 7058      | A_33_P3227375  | -1.28 ± 1.10 | 1.61 |
| <b>EDIL3</b>        | EGF-like repeats and discoidin I-like domains 3                                        | 10085     | A_23_P401606   | -1.28 ± 1.06 | 1.70 |
| <b>ACTA2</b>        | actin, alpha 2, smooth muscle, aorta                                                   | 59        | A_23_P150053   | -1.28 ± 1.02 | 1.79 |
| <b>LMCD1</b>        | LIM and cysteine-rich domains 1                                                        | 29995     | A_23_P6771     | -1.28 ± 0.59 | 3.84 |
| <b>LRRC15</b>       | leucine rich repeat containing 15                                                      | 131578    | A_24_P827037   | -1.27 ± 1.49 | 1.04 |
| <b>NALCN</b>        | sodium leak channel, non selective                                                     | 259232    | A_33_P3230166  | -1.27 ± 1.03 | 1.74 |
| <b>MXRA5</b>        | matrix-remodelling associated 5                                                        | 25878     | A_23_P258136   | -1.26 ± 1.61 | 0.93 |
| <b>TGFBR3</b>       | transforming growth factor, beta receptor III                                          | 7049      | A_23_P200780   | 1.26 ± 1.19  | 1.41 |
| <b>CCDC144A</b>     | coiled-coil domain containing 144A                                                     |           | A_33_P3390580  | -1.26 ± 1.13 | 1.52 |

|                   |                                                                                                     |           |                |              |      |
|-------------------|-----------------------------------------------------------------------------------------------------|-----------|----------------|--------------|------|
| <b>BGN</b>        | biglycan                                                                                            | 633       | A_23_P34126    | -1.26 ± 0.98 | 1.84 |
| <b>CCPG1</b>      | cell cycle progression 1                                                                            | 9236      | A_23_P346006   | -1.26 ± 0.85 | 2.28 |
| <b>NEDD4L</b>     | neural precursor cell expressed, developmentally down-regulated 4-like, E3 ubiquitin protein ligase | 23327     | A_24_P108311   | 1.26 ± 0.71  | 2.93 |
| <b>NEK2</b>       | NIMA-related kinase 2                                                                               | 4751      | A_23_P35219    | 1.26 ± 0.71  | 2.92 |
| <b>TUBBP5</b>     | tubulin, beta pseudogene 5                                                                          |           | A_33_P3409518  | 1.25 ± 1.45  | 1.05 |
| <b>TRPA1</b>      | transient receptor potential cation channel, subfamily A, member 1                                  | 8989      | A_24_P235338   | 1.25 ± 1.11  | 1.54 |
| <b>RAB26</b>      | RAB26, member RAS oncogene family                                                                   | 25837     | A_33_P3209229  | 1.25 ± 1.02  | 1.75 |
| <b>C7orf69</b>    | chromosome 7 open reading frame 69                                                                  |           | A_23_P168368   | -1.25 ± 0.99 | 1.82 |
| <b>TMSB15A</b>    | thymosin beta 15a                                                                                   | 11013     | A_23_P137173   | 1.25 ± 0.89  | 2.12 |
| <b>TOP2A</b>      | topoisomerase (DNA) II alpha 170kDa                                                                 | 7153      | A_23_P118834   | 1.25 ± 0.89  | 2.10 |
| <b>MMP23B</b>     | matrix metalloproteinase 23B                                                                        | 8510      | A_23_P74088    | -1.25 ± 0.86 | 2.22 |
| <b>PRR11</b>      | proline rich 11                                                                                     | 55771     | A_33_P3403075  | 1.25 ± 0.74  | 2.75 |
| <b>CYP3A7</b>     | cytochrome P450, family 3, subfamily A, polypeptide 7                                               | 1551      | A_23_P358917   | -1.24 ± 1.46 | 1.04 |
| <b>C4B</b>        | complement component 4B (Chido blood group)                                                         | 721       | A_23_P42282    | -1.24 ± 1.25 | 1.30 |
| <b>AREG</b>       | amphiregulin                                                                                        | 374       | A_23_P259071   | 1.24 ± 1.17  | 1.42 |
| <b>DNER</b>       | delta/notch-like EGF repeat containing                                                              | 92737     | A_23_P362148   | 1.24 ± 0.99  | 1.80 |
| <b>PHLDA1</b>     | pleckstrin homology-like domain, family A, member 1                                                 | 22822     | A_24_P915692   | 1.24 ± 0.87  | 2.17 |
| <b>HES4</b>       | hes family bHLH transcription factor 4                                                              | 57801     | A_33_P3342628  | -1.24 ± 0.76 | 2.61 |
| <b>SVIL</b>       | supervillin                                                                                         | 6840      | A_23_P35349    | 1.24 ± 0.75  | 2.62 |
| <b>GTSE1</b>      | G-2 and S-phase expressed 1                                                                         | 51512     | A_23_P57588    | 1.24 ± 0.72  | 2.81 |
| <b>STXBP5-AS1</b> | STXBP5 antisense RNA 1                                                                              |           | A_19_P00322407 | 1.24 ± 0.58  | 3.71 |
| <b>RPS4Y1</b>     | ribosomal protein S4, Y-linked 1                                                                    | 6192      | A_23_P259314   | -1.23 ± 4.16 | 0.26 |
| <b>PTGDS</b>      | prostaglandin D2 synthase 21kDa (brain)                                                             | 5730      | A_33_P3298159  | -1.23 ± 1.52 | 0.97 |
| <b>ID4</b>        | inhibitor of DNA binding 4, dominant negative helix-loop-helix protein                              | 3400      | A_33_P3229370  | -1.23 ± 1.52 | 0.96 |
| <b>C11orf96</b>   | chromosome 11 open reading frame 96                                                                 | 387763    | A_32_P74409    | -1.23 ± 1.16 | 1.43 |
| <b>MDFI</b>       | MyoD family inhibitor                                                                               | 4188      | A_33_P3246418  | -1.23 ± 1.12 | 1.48 |
| <b>CCND2-AS1</b>  | CCND2 antisense RNA 1                                                                               | 103752584 | A_22_P00006494 | -1.23 ± 0.95 | 1.89 |

|                   |                                                                                                              |        |               |              |      |
|-------------------|--------------------------------------------------------------------------------------------------------------|--------|---------------|--------------|------|
| <b>SCARA3</b>     | scavenger receptor class A, member 3                                                                         | 51435  | A_23_P215900  | 1.23 ± 0.90  | 2.02 |
| <b>HRK</b>        | harakiri, BCL2 interacting protein                                                                           | 8739   | A_23_P25194   | -1.22 ± 1.47 | 1.00 |
| <b>SUV39H1</b>    | suppressor of variegation 3-9 homolog 1 (Drosophila)                                                         | 6839   | A_23_P422193  | 1.22 ± 1.02  | 1.68 |
| <b>MSC</b>        | musculin                                                                                                     | 9242   | A_23_P256948  | -1.22 ± 0.94 | 1.87 |
| <b>PTTG3P</b>     | pituitary tumor-transforming 3, pseudogene                                                                   | 26255  | A_23_P60016   | 1.22 ± 0.92  | 1.94 |
| <b>DUSP10</b>     | dual specificity phosphatase 10                                                                              | 11221  | A_24_P182494  | 1.22 ± 0.87  | 2.10 |
| <b>BTBD11</b>     | BTB (POZ) domain containing 11                                                                               | 121551 | A_23_P419714  | 1.22 ± 0.72  | 2.73 |
| <b>CHN1</b>       | chimerin 1                                                                                                   | 1123   | A_33_P3325723 | 1.22 ± 0.65  | 3.15 |
| <b>LRRC17</b>     | leucine rich repeat containing 17                                                                            | 10234  | A_23_P253958  | -1.21 ± 1.33 | 1.14 |
| <b>THBD</b>       | thrombomodulin                                                                                               | 7056   | A_23_P91390   | 1.21 ± 1.15  | 1.41 |
| <b>MYBL1</b>      | v-myb avian myeloblastosis viral oncogene homolog-like 1                                                     | 4603   | A_23_P43157   | 1.21 ± 1.00  | 1.70 |
| <b>SLC7A7</b>     | solute carrier family 7 (amino acid transporter light chain, y+L system), member 7                           | 9056   | A_23_P99642   | -1.21 ± 0.88 | 2.06 |
| <b>FN1</b>        | fibronectin 1                                                                                                | 2335   | A_24_P334130  | -1.21 ± 0.82 | 2.27 |
| <b>FAM46C</b>     | family with sequence similarity 46, member C                                                                 | 54855  | A_33_P3314176 | 1.21 ± 0.77  | 2.45 |
| <b>PDE4B</b>      | phosphodiesterase 4B, cAMP-specific                                                                          | 5142   | A_23_P74278   | 1.20 ± 1.19  | 1.32 |
| <b>SLC22A15</b>   | solute carrier family 22, member 15                                                                          | 55356  | A_23_P388900  | -1.20 ± 0.87 | 2.04 |
| <b>HRCT1</b>      | histidine rich carboxyl terminus 1                                                                           | 646962 | A_23_P94434   | 1.20 ± 0.73  | 2.61 |
| <b>IL12A</b>      | interleukin 12A                                                                                              | 3592   | A_23_P91943   | 1.20 ± 0.61  | 3.31 |
| <b>ST6GALNAC5</b> | ST6 (alpha-N-acetyl-neuraminy-2,3-beta-galactosyl-1,3)-N-acetylgalactosaminide alpha-2,6-sialyltransferase 5 | 81849  | A_23_P33093   | -1.19 ± 1.37 | 1.06 |
| <b>CDH2</b>       | cadherin 2, type 1, N-cadherin (neuronal)                                                                    | 1000   | A_33_P3214159 | -1.19 ± 1.09 | 1.47 |
| <b>FAM65B</b>     | family with sequence similarity 65, member B                                                                 | 9750   | A_24_P941359  | 1.19 ± 0.90  | 1.92 |
| <b>FOS</b>        | FBJ murine osteosarcoma viral oncogene homolog                                                               | 2353   | A_23_P106194  | 1.18 ± 1.87  | 0.69 |
| <b>FCGR3A</b>     | Fc fragment of IgG, low affinity IIIa, receptor (CD16a)                                                      | 2214   | A_23_P200728  | 1.18 ± 1.77  | 0.74 |
| <b>HTR2B</b>      | 5-hydroxytryptamine (serotonin) receptor 2B, G protein-coupled                                               | 3357   | A_23_P16953   | -1.18 ± 1.37 | 1.06 |
| <b>CSF2</b>       | colony stimulating factor 2 (granulocyte-macrophage)                                                         | 1437   | A_23_P133408  | 1.18 ± 1.18  | 1.29 |

|                  |                                                                                                        |        |                |              |      |
|------------------|--------------------------------------------------------------------------------------------------------|--------|----------------|--------------|------|
| <b>RSPO3</b>     | R-spondin 3                                                                                            | 84870  | A_24_P106542   | -1.18 ± 1.08 | 1.49 |
| <b>GPX3</b>      | glutathione peroxidase 3 (plasma)                                                                      | 2878   | A_23_P133474   | 1.18 ± 1.06  | 1.51 |
| <b>KCTD15</b>    | potassium channel tetramerization domain containing 15                                                 | 79047  | A_24_P373844   | -1.18 ± 0.75 | 2.47 |
| <b>LINC01144</b> | lincRNA 1144                                                                                           | 400752 | A_33_P3239317  | 1.18 ± 0.72  | 2.65 |
| <b>LAMA2</b>     | laminin, alpha 2                                                                                       | 3908   | A_23_P70719    | -1.18 ± 0.65 | 3.01 |
| <b>LETM2</b>     | leucine zipper-EF-hand containing transmembrane protein 2                                              | 137994 | A_23_P348264   | 1.18 ± 0.59  | 3.42 |
| <b>IGFBP3</b>    | insulin-like growth factor binding protein 3                                                           | 3486   | A_23_P215634   | -1.17 ± 1.01 | 1.61 |
| <b>CAMK1G</b>    | calcium/calmodulin-dependent protein kinase IG                                                         | 57172  | A_23_P97402    | 1.17 ± 0.97  | 1.70 |
| <b>PSCA</b>      | prostate stem cell antigen                                                                             | 8000   | A_23_P71379    | 1.16 ± 1.72  | 0.75 |
| <b>ECM2</b>      | extracellular matrix protein 2, female organ and adipocyte specific                                    | 1842   | A_23_P303671   | -1.16 ± 1.15 | 1.31 |
| <b>PTGER2</b>    | prostaglandin E receptor 2 (subtype EP2), 53kDa                                                        | 5732   | A_23_P151710   | 1.16 ± 1.05  | 1.49 |
| <b>SKA3</b>      | spindle and kinetochore associated complex subunit 3                                                   | 221150 | A_33_P3216008  | 1.16 ± 0.98  | 1.65 |
| <b>KLHDC9</b>    | kelch domain containing 9                                                                              | 126823 | A_23_P86100    | 1.16 ± 0.95  | 1.71 |
| <b>FAR2</b>      | fatty acyl CoA reductase 2                                                                             | 55711  | A_23_P150903   | 1.16 ± 0.87  | 1.96 |
| <b>C5orf34</b>   | chromosome 5 open reading frame 34                                                                     | 375444 | A_23_P403081   | 1.16 ± 0.85  | 2.04 |
| <b>CNTFR-AS1</b> | CNTFR antisense RNA 1                                                                                  |        | A_22_P00005289 | -1.16 ± 0.85 | 2.01 |
| <b>LOC81691</b>  | exonuclease NEF-sp                                                                                     | 81691  | A_23_P49459    | 1.16 ± 0.80  | 2.20 |
| <b>CENPH</b>     | centromere protein H                                                                                   | 64946  | A_23_P110802   | 1.16 ± 0.75  | 2.41 |
| <b>MPHOSPH9</b>  | M-phase phosphoprotein 9                                                                               | 10198  | A_24_P398500   | 1.16 ± 0.74  | 2.44 |
| <b>DGUOK-AS1</b> | DGUOK antisense RNA 1                                                                                  |        | A_22_P00002126 | 1.16 ± 0.60  | 3.30 |
| <b>CXCL3</b>     | chemokine (C-X-C motif) ligand 3                                                                       | 2921   | A_24_P183150   | 1.15 ± 1.62  | 0.81 |
| <b>SERPINF1</b>  | serpin peptidase inhibitor, clade F (alpha-2 antiplasmin, pigment epithelium derived factor), member 1 | 5176   | A_23_P100660   | -1.15 ± 1.31 | 1.08 |
| <b>CLDN23</b>    | claudin 23                                                                                             | 137075 | A_23_P134854   | 1.15 ± 1.22  | 1.19 |
| <b>PRRX2</b>     | paired related homeobox 2                                                                              | 51450  | A_23_P83298    | 1.15 ± 1.08  | 1.42 |
| <b>ERCC6L</b>    | excision repair cross-complementation group 6-like                                                     | 54821  | A_23_P96325    | 1.15 ± 0.96  | 1.68 |
| <b>RAB33A</b>    | RAB33A, member RAS oncogene family                                                                     | 9363   | A_23_P147025   | -1.15 ± 0.78 | 2.25 |



|                     |                                                                     |           |                |              |      |
|---------------------|---------------------------------------------------------------------|-----------|----------------|--------------|------|
| <b>BUB1</b>         | BUB1 mitotic checkpoint serine/threonine kinase                     | 699       | A_23_P124417   | 1.15 ± 0.63  | 3.02 |
| <b>OR4F6</b>        | olfactory receptor, family 4, subfamily F, member 6                 | 390648    | A_33_P3344454  | -1.15 ± 0.57 | 3.44 |
| <b>PROS1</b>        | protein S (alpha)                                                   | 5627      | A_23_P73114    | -1.14 ± 1.18 | 1.24 |
| <b>RSPO4</b>        | R-spondin 4                                                         | 343637    | A_33_P3251552  | -1.14 ± 1.14 | 1.30 |
| <b>KCNG1</b>        | potassium channel, voltage gated modifier subfamily G, member 1     | 3755      | A_22_P00005343 | -1.14 ± 1.06 | 1.43 |
| <b>FCGR2A</b>       | Fc fragment of IgG, low affinity IIa, receptor (CD32)               | 2212      | A_23_P85716    | 1.14 ± 1.00  | 1.56 |
| <b>LINC00968</b>    | lincRNA 968                                                         | 100507632 | A_21_P0000731  | -1.14 ± 0.91 | 1.79 |
| <b>ADAMTS12</b>     | ADAM metalloproteinase with thrombospondin type 1 motif, 12         | 81792     | A_23_P44648    | -1.14 ± 0.90 | 1.82 |
| <b>ZMAT4</b>        | zinc finger, matrin-type 4                                          | 79698     | A_32_P164593   | -1.14 ± 0.89 | 1.83 |
| <b>DNAJC12</b>      | DnaJ (Hsp40) homolog, subfamily C, member 12                        | 56521     | A_33_P3225066  | -1.14 ± 0.87 | 1.91 |
| <b>ITGA2</b>        | integrin, alpha 2 (CD49B, alpha 2 subunit of VLA-2 receptor)        | 3673      | A_32_P178800   | 1.14 ± 0.83  | 2.05 |
| <b>GINS2</b>        | GINS complex subunit 2 (Psf2 homolog)                               | 51659     | A_23_P118246   | 1.14 ± 0.77  | 2.28 |
| <b>LOC100128288</b> | uncharacterized LOC100128288                                        |           | A_24_P256415   | -1.14 ± 0.77 | 2.27 |
| <b>CHD7</b>         | chromodomain helicase DNA binding protein 7                         | 55636     | A_24_P289383   | -1.14 ± 0.73 | 2.46 |
| <b>DMKN</b>         | dermokine                                                           | 93099     | A_23_P320261   | -1.13 ± 1.33 | 1.04 |
| <b>CEMIP</b>        | cell migration inducing protein, hyaluronan binding                 | 57214     | A_23_P324754   | -1.13 ± 0.99 | 1.58 |
| <b>AURKA</b>        | aurora kinase A                                                     | 6790      | A_23_P131866   | 1.13 ± 0.90  | 1.81 |
| <b>PSMC3IP</b>      | PSMC3 interacting protein                                           | 29893     | A_24_P287941   | 1.13 ± 0.90  | 1.81 |
| <b>NOV</b>          | nephroblastoma overexpressed                                        | 4856      | A_23_P82929    | 1.13 ± 0.90  | 1.80 |
| <b>ZNF571</b>       | zinc finger protein 571                                             | 51276     | A_23_P108342   | 1.13 ± 0.89  | 1.83 |
| <b>DPF1</b>         | D4, zinc and double PHD fingers family 1                            | 8193      | A_33_P3317277  | 1.13 ± 0.81  | 2.09 |
| <b>TTK</b>          | TTK protein kinase                                                  | 7272      | A_23_P259586   | 1.13 ± 0.77  | 2.22 |
| <b>PITX1</b>        | paired-like homeodomain 1                                           | 5307      | A_33_P3240328  | 1.12 ± 1.95  | 0.61 |
| <b>NOX4</b>         | NADPH oxidase 4                                                     | 50507     | A_23_P47148    | -1.12 ± 1.28 | 1.08 |
| <b>PRKAR1B</b>      | protein kinase, cAMP-dependent, regulatory, type I, beta            | 5575      | A_33_P3360675  | 1.12 ± 1.19  | 1.20 |
| <b>ACHE</b>         | acetylcholinesterase (Yt blood group)                               | 43        | A_24_P60845    | -1.12 ± 1.15 | 1.25 |
| <b>APOBEC3B</b>     | apolipoprotein B mRNA editing enzyme, catalytic polypeptide-like 3B | 9582      | A_24_P66027    | 1.12 ± 0.96  | 1.60 |

|                     |                                                                           |           |                |              |      |
|---------------------|---------------------------------------------------------------------------|-----------|----------------|--------------|------|
| <b>SLC6A9</b>       | solute carrier family 6 (neurotransmitter transporter, glycine), member 9 | 6536      | A_33_P3402615  | -1.12 ± 0.91 | 1.74 |
| <b>SPC24</b>        | SPC24, NDC80 kinetochore complex component                                | 147841    | A_24_P314571   | 1.12 ± 0.86  | 1.90 |
| <b>RDH10</b>        | retinol dehydrogenase 10 (all-trans)                                      | 157506    | A_32_P25050    | -1.12 ± 0.86 | 1.89 |
| <b>SGOL1</b>        | shugoshin-like 1 (S. pombe)                                               | 151648    | A_24_P225970   | 1.12 ± 0.85  | 1.90 |
| <b>CACNG8</b>       | calcium channel, voltage-dependent, gamma subunit 8                       | 59283     | A_23_P420218   | -1.12 ± 0.83 | 2.01 |
| <b>SLC2A9</b>       | solute carrier family 2 (facilitated glucose transporter), member 9       | 56606     | A_23_P213014   | -1.12 ± 0.77 | 2.21 |
| <b>GALNT5</b>       | polypeptide N-acetylgalactosaminyltransferase 5                           | 11227     | A_24_P408736   | 1.12 ± 0.75  | 2.28 |
| <b>CRLF1</b>        | cytokine receptor-like factor 1                                           | 9244      | A_33_P3252286  | -1.11 ± 1.15 | 1.24 |
| <b>TIMP3</b>        | TIMP metalloproteinase inhibitor 3                                        | 7078      | A_23_P399078   | -1.11 ± 1.08 | 1.35 |
| <b>CLDN4</b>        | claudin 4                                                                 | 1364      | A_33_P3285545  | 1.11 ± 1.05  | 1.41 |
| <b>LOC101928812</b> | uncharacterized LOC101928812                                              |           | A_21_P0007435  | 1.11 ± 0.99  | 1.55 |
| <b>TSLP</b>         | thymic stromal lymphopoietin                                              | 85480     | A_33_P3221783  | 1.11 ± 0.88  | 1.80 |
| <b>LINC00856</b>    | lincRNA 856                                                               | 100132987 | A_33_P6806243  | 1.11 ± 0.82  | 2.00 |
| <b>CHST11</b>       | carbohydrate (chondroitin 4) sulfotransferase 11                          | 50515     | A_23_P139919   | 1.11 ± 0.81  | 2.04 |
| <b>AXIN2</b>        | axin 2                                                                    | 8313      | A_23_P148015   | -1.11 ± 0.73 | 2.37 |
| <b>TNFRSF1B</b>     | tumor necrosis factor receptor superfamily, member 1B                     | 7133      | A_24_P54174    | 1.11 ± 0.71  | 2.48 |
| <b>HMGA1</b>        | high mobility group AT-hook 1                                             | 3159      | A_23_P42331    | 1.11 ± 0.53  | 3.66 |
| <b>MAPK13</b>       | mitogen-activated protein kinase 13                                       | 5603      | A_24_P406132   | 1.11 ± 0.53  | 3.65 |
| <b>AIM1</b>         | absent in melanoma 1                                                      | 202       | A_23_P70785    | 1.10 ± 0.95  | 1.60 |
| <b>VEGFA</b>        | vascular endothelial growth factor A                                      | 7422      | A_23_P70398    | -1.10 ± 0.81 | 2.00 |
| <b>ERV3-1</b>       | endogenous retrovirus group 3, member 1                                   | 2086      | A_33_P3228355  | 1.10 ± 0.70  | 2.46 |
| <b>MYH10</b>        | myosin, heavy chain 10, non-muscle                                        | 4628      | A_33_P3235004  | -1.10 ± 0.60 | 3.02 |
| <b>ELN</b>          | elastin                                                                   | 2006      | A_23_P215454   | -1.09 ± 1.46 | 0.86 |
| <b>LOC400958</b>    | uncharacterized LOC400958                                                 | 400958    | A_19_P00800206 | -1.09 ± 1.33 | 0.98 |
| <b>HOXC-AS2</b>     | HOXC cluster antisense RNA 2                                              | 100874364 | A_22_P00015030 | -1.09 ± 0.91 | 1.70 |
| <b>SPC25</b>        | SPC25, NDC80 kinetochore complex component                                | 57405     | A_23_P51085    | 1.09 ± 0.89  | 1.74 |
| <b>SCARNA5</b>      | small Cajal body-specific RNA 5                                           | 677775    | A_33_P3363082  | -1.09 ± 0.77 | 2.13 |

|                  |                                                                |        |               |              |      |
|------------------|----------------------------------------------------------------|--------|---------------|--------------|------|
| <b>TMEM59L</b>   | transmembrane protein 59-like                                  | 25789  | A_33_P3302245 | -1.09 ± 0.76 | 2.18 |
| <b>ZNF669</b>    | zinc finger protein 669                                        | 79862  | A_33_P3339687 | 1.09 ± 0.72  | 2.33 |
| <b>UNC5B</b>     | unc-5 homolog B (C. elegans)                                   | 219699 | A_23_P52336   | -1.09 ± 0.70 | 2.42 |
| <b>PTTG1</b>     | pituitary tumor-transforming 1                                 | 9232   | A_23_P7636    | 1.09 ± 0.70  | 2.40 |
| <b>IRS2</b>      | insulin receptor substrate 2                                   | 8660   | A_24_P154037  | -1.09 ± 0.60 | 3.03 |
| <b>C10orf120</b> | chromosome 10 open reading frame 120                           | 399814 | A_33_P3287477 | 1.09 ± 0.57  | 3.25 |
| <b>GSTT2</b>     | glutathione S-transferase theta 2                              | 2953   | A_23_P109427  | 1.08 ± 1.34  | 0.96 |
| <b>FOXS1</b>     | forkhead box S1                                                | 2307   | A_33_P3283833 | -1.08 ± 1.32 | 0.98 |
| <b>FSCN3</b>     | fascin actin-bundling protein 3, testicular                    | 29999  | A_23_P93898   | -1.08 ± 1.06 | 1.33 |
| <b>HIVEP3</b>    | human immunodeficiency virus type I enhancer binding protein 3 | 59269  | A_32_P59302   | -1.08 ± 0.90 | 1.67 |
| <b>CIT</b>       | citron rho-interacting serine/threonine kinase                 | 11113  | A_23_P420551  | 1.08 ± 0.85  | 1.82 |
| <b>BLM</b>       | Bloom syndrome, RecQ helicase-like                             | 641    | A_23_P88630   | 1.08 ± 0.84  | 1.88 |
| <b>SFXN2</b>     | sideroflexin 2                                                 | 118980 | A_24_P175612  | 1.08 ± 0.84  | 1.88 |
| <b>SOX9</b>      | SRY (sex determining region Y)-box 9                           | 6662   | A_23_P26847   | 1.08 ± 0.84  | 1.88 |
| <b>SHCBP1</b>    | SHC SH2-domain binding protein 1                               | 79801  | A_32_P96719   | 1.08 ± 0.79  | 2.02 |
| <b>IQGAP3</b>    | IQ motif containing GTPase activating protein 3                | 128239 | A_33_P3321293 | 1.08 ± 0.78  | 2.07 |
| <b>SNORD12</b>   | small nucleolar RNA, C/D box 12                                | 692057 | A_21_P0000365 | -1.08 ± 0.74 | 2.20 |
| <b>GXYLT1</b>    | glucoside xylosyltransferase 1                                 | 283464 | A_23_P336796  | 1.08 ± 0.73  | 2.28 |
| <b>MMP1</b>      | matrix metalloproteinase 1 (interstitial collagenase)          | 4312   | A_23_P1691    | 1.07 ± 2.18  | 0.49 |
| <b>SLITRK6</b>   | SLIT and NTRK-like family, member 6                            | 84189  | A_23_P65307   | 1.07 ± 1.82  | 0.63 |
| <b>NEURL1</b>    | neuralized E3 ubiquitin protein ligase 1                       | 9148   | A_33_P3293524 | 1.07 ± 1.48  | 0.83 |
| <b>GREM2</b>     | gremlin 2, DAN family BMP antagonist                           | 64388  | A_24_P40626   | 1.07 ± 1.32  | 0.97 |
| <b>PTPRB</b>     | protein tyrosine phosphatase, receptor type, B                 | 5787   | A_23_P53390   | -1.07 ± 1.30 | 0.99 |
| <b>SLC4A3</b>    | solute carrier family 4 (anion exchanger), member 3            | 6508   | A_23_P39647   | -1.07 ± 0.92 | 1.62 |
| <b>ASF1B</b>     | anti-silencing function 1B histone chaperone                   | 55723  | A_23_P119254  | 1.07 ± 0.87  | 1.75 |
| <b>METTL7B</b>   | methyltransferase like 7B                                      | 196410 | A_24_P64653   | 1.07 ± 0.85  | 1.80 |
| <b>TP53INP2</b>  | tumor protein p53 inducible nuclear protein 2                  | 58476  | A_24_P357465  | 1.07 ± 0.80  | 1.98 |
| <b>SYNPO2L</b>   | synaptopodin 2-like                                            | 79933  | A_23_P355517  | -1.06 ± 1.76 | 0.64 |
| <b>TMEM130</b>   | transmembrane protein 130                                      | 222865 | A_23_P349966  | -1.06 ± 1.29 | 0.99 |

|                     |                                                                                                           |           |               |              |      |
|---------------------|-----------------------------------------------------------------------------------------------------------|-----------|---------------|--------------|------|
| <b>KCNMB4</b>       | potassium channel subfamily M regulatory beta subunit 4                                                   | 27345     | A_23_P64792   | -1.06 ± 1.07 | 1.28 |
| <b>ZSWIM5</b>       | zinc finger, SWIM-type containing 5                                                                       | 57643     | A_23_P383118  | 1.06 ± 0.96  | 1.51 |
| <b>PPFIA4</b>       | protein tyrosine phosphatase, receptor type, f polypeptide (PTPRF), interacting protein (liprin), alpha 4 | 8497      | A_23_P420692  | -1.06 ± 0.93 | 1.57 |
| <b>FUCA1</b>        | fucosidase, alpha-L- 1, tissue                                                                            | 2517      | A_23_P11543   | 1.06 ± 0.92  | 1.58 |
| <b>PITX2</b>        | paired-like homeodomain 2                                                                                 | 5308      | A_23_P167367  | 1.06 ± 0.88  | 1.71 |
| <b>TGFB3</b>        | transforming growth factor, beta 3                                                                        | 7043      | A_23_P88404   | -1.06 ± 0.88 | 1.69 |
| <b>GABRE</b>        | gamma-aminobutyric acid (GABA) A receptor, epsilon                                                        | 2564      | A_23_P159775  | -1.06 ± 0.82 | 1.87 |
| <b>NRGN</b>         | neurogranin (protein kinase C substrate, RC3)                                                             | 4900      | A_23_P116264  | 1.06 ± 0.75  | 2.14 |
| <b>ZDHHC23</b>      | zinc finger, DHHC-type containing 23                                                                      | 254887    | A_23_P350689  | 1.06 ± 0.72  | 2.26 |
| <b>KIAA0101</b>     | KIAA0101                                                                                                  | 9768      | A_23_P117852  | 1.06 ± 0.68  | 2.45 |
| <b>PCSK5</b>        | proprotein convertase subtilisin/kexin type 5                                                             | 5125      | A_23_P257003  | -1.06 ± 0.63 | 2.74 |
| <b>CLEC3B</b>       | C-type lectin domain family 3, member B                                                                   | 7123      | A_23_P69497   | 1.05 ± 1.40  | 0.87 |
| <b>SMPDL3A</b>      | sphingomyelin phosphodiesterase, acid-like 3A                                                             | 10924     | A_23_P72117   | -1.05 ± 1.05 | 1.30 |
| <b>OR10G2</b>       | olfactory receptor, family 10, subfamily G, member 2                                                      | 26534     | A_33_P3225507 | -1.05 ± 1.01 | 1.39 |
| <b>DCLK1</b>        | doublecortin-like kinase 1                                                                                | 9201      | A_23_P369994  | -1.05 ± 1.00 | 1.39 |
| <b>SLC38A5</b>      | solute carrier family 38, member 5                                                                        | 92745     | A_23_P84929   | -1.05 ± 0.98 | 1.43 |
| <b>FXVD1</b>        | FXVD domain containing ion transport regulator 1                                                          |           | A_33_P3228435 | -1.05 ± 0.98 | 1.43 |
| <b>PLK1</b>         | polo-like kinase 1                                                                                        | 5347      | A_23_P118174  | 1.05 ± 0.92  | 1.59 |
| <b>CCNT2</b>        | cyclin T2                                                                                                 | 905       | A_24_P174341  | 1.05 ± 0.87  | 1.71 |
| <b>PITPNM2</b>      | phosphatidylinositol transfer protein, membrane-associated 2                                              | 57605     | A_23_P401361  | 1.05 ± 0.82  | 1.85 |
| <b>CDCA3</b>        | cell division cycle associated 3                                                                          | 83461     | A_24_P218979  | 1.05 ± 0.81  | 1.88 |
| <b>FUT10</b>        | fucosyltransferase 10 (alpha (1,3) fucosyltransferase)                                                    | 84750     | A_33_P3748714 | 1.05 ± 0.78  | 1.98 |
| <b>RGS20</b>        | regulator of G-protein signaling 20                                                                       | 8601      | A_23_P73097   | 1.05 ± 0.75  | 2.11 |
| <b>PALM</b>         | paralemmin                                                                                                | 5064      | A_33_P3384287 | -1.05 ± 0.72 | 2.22 |
| <b>MND1</b>         | meiotic nuclear divisions 1 homolog (S. cerevisiae)                                                       | 84057     | A_23_P133123  | 1.05 ± 0.67  | 2.50 |
| <b>LOC101929484</b> | uncharacterized LOC101929484                                                                              | 101929484 | A_21_P0004807 | -1.04 ± 1.07 | 1.26 |

|                   |                                                                               |           |                |              |      |
|-------------------|-------------------------------------------------------------------------------|-----------|----------------|--------------|------|
| <b>CCDC74A</b>    | coiled-coil domain containing 74A                                             | 90557     | A_33_P3303212  | -1.04 ± 1.01 | 1.37 |
| <b>ABCA8</b>      | ATP-binding cassette, sub-family A (ABC1), member 8                           | 10351     | A_33_P3342305  | -1.04 ± 0.97 | 1.44 |
| <b>CYB5RL</b>     | cytochrome b5 reductase-like                                                  | 606495    | A_33_P3353263  | 1.04 ± 0.88  | 1.65 |
| <b>TLR2</b>       | toll-like receptor 2                                                          | 7097      | A_23_P92499    | 1.04 ± 0.88  | 1.63 |
| <b>PLCB4</b>      | phospholipase C, beta 4                                                       | 5332      | A_33_P3353502  | 1.04 ± 0.86  | 1.70 |
| <b>ZNF365</b>     | zinc finger protein 365                                                       | 22891     | A_24_P226970   | -1.04 ± 0.86 | 1.69 |
| <b>NCAPG</b>      | non-SMC condensin I complex, subunit G                                        | 64151     | A_33_P3230254  | 1.04 ± 0.82  | 1.83 |
| <b>NEURL1B</b>    | neuralized E3 ubiquitin protein ligase 1B                                     | 54492     | A_32_P198731   | 1.04 ± 0.73  | 2.15 |
| <b>PTTG2</b>      | pituitary tumor-transforming 2                                                | 10744     | A_23_P18579    | 1.04 ± 0.72  | 2.19 |
| <b>PLEKHG4</b>    | pleckstrin homology domain containing, family G (with RhoGef domain) member 4 | 25894     | A_23_P345460   | 1.04 ± 0.64  | 2.61 |
| <b>DDO</b>        | D-aspartate oxidase                                                           | 8528      | A_23_P30603    | 1.04 ± 0.57  | 3.08 |
| <b>RHOBTB1</b>    | Rho-related BTB domain containing 1                                           | 9886      | A_33_P3348288  | -1.04 ± 0.52 | 3.40 |
| <b>APOE</b>       | apolipoprotein E                                                              | 348       | A_33_P3223592  | -1.03 ± 1.60 | 0.71 |
| <b>TRIM55</b>     | tripartite motif containing 55                                                | 84675     | A_23_P123402   | 1.03 ± 1.46  | 0.81 |
| <b>BMP5</b>       | bone morphogenetic protein 5                                                  | 653       | A_23_P19723    | 1.03 ± 1.45  | 0.81 |
| <b>PBK</b>        | PDZ binding kinase                                                            | 55872     | A_32_P62997    | 1.03 ± 1.07  | 1.24 |
| <b>GAA</b>        | glucosidase, alpha; acid                                                      | 2548      | A_23_P153026   | -1.03 ± 1.06 | 1.26 |
| <b>FBP1</b>       | fructose-1,6-bisphosphatase 1                                                 | 2203      | A_23_P257111   | 1.03 ± 1.06  | 1.26 |
| <b>HIST1H1A</b>   | histone cluster 1, H1a                                                        | 3024      | A_23_P70448    | 1.03 ± 0.99  | 1.37 |
| <b>RNF112</b>     | ring finger protein 112                                                       | 7732      | A_23_P107116   | 1.03 ± 0.98  | 1.40 |
| <b>AKR1C1</b>     | aldo-keto reductase family 1, member C1                                       | 1645      | A_23_P257971   | 1.03 ± 0.92  | 1.53 |
| <b>VLDLR-AS1</b>  | VLDLR antisense RNA 1                                                         | 401491    | A_19_P00315804 | -1.03 ± 0.91 | 1.55 |
| <b>ERO1LB</b>     | ERO1-like beta ( <i>S. cerevisiae</i> )                                       | 56605     | A_33_P3350703  | -1.03 ± 0.89 | 1.60 |
| <b>USP18</b>      | ubiquitin specific peptidase 18                                               | 11274     | A_23_P132159   | 1.03 ± 0.89  | 1.58 |
| <b>PGM5P4-AS1</b> | PGM5P4 antisense RNA 1                                                        | 101929127 | A_21_P0012084  | 1.03 ± 0.87  | 1.66 |
| <b>BIRC5</b>      | baculoviral IAP repeat containing 5                                           | 332       | A_23_P118815   | 1.03 ± 0.85  | 1.71 |
| <b>BUB1B</b>      | BUB1 mitotic checkpoint serine/threonine kinase B                             | 701       | A_23_P163481   | 1.03 ± 0.80  | 1.88 |
| <b>MPP1</b>       | membrane protein, palmitoylated 1, 55kDa                                      | 4354      | A_23_P171296   | 1.03 ± 0.64  | 2.55 |

|                     |                                                          |           |                |              |      |
|---------------------|----------------------------------------------------------|-----------|----------------|--------------|------|
| <b>PKNOX2</b>       | PBX/knotted 1 homeobox 2                                 | 63876     | A_23_P75529    | -1.02 ± 1.15 | 1.09 |
| <b>DOK6</b>         | docking protein 6                                        | 220164    | A_32_P160561   | -1.02 ± 1.03 | 1.30 |
| <b>LOC101928076</b> | uncharacterized LOC101928076                             |           | A_32_P4626     | -1.02 ± 1.02 | 1.29 |
| <b>PAQR5</b>        | progesterone and adiponectin receptor family member V    | 54852     | A_33_P3368750  | 1.02 ± 0.98  | 1.38 |
| <b>LINC00578</b>    | lincRNA 578                                              |           | A_21_P0014129  | -1.02 ± 0.94 | 1.46 |
| <b>CKAP2L</b>       | cytoskeleton associated protein 2-like                   | 150468    | A_23_P388812   | 1.02 ± 0.89  | 1.57 |
| <b>QRICH2</b>       | glutamine rich 2                                         | 84074     | A_23_P141142   | 1.02 ± 0.89  | 1.57 |
| <b>MYO1D</b>        | myosin ID                                                | 4642      | A_23_P389102   | -1.02 ± 0.87 | 1.64 |
| <b>AGPAT9</b>       | 1-acylglycerol-3-phosphate O-acyltransferase 9           | 84803     | A_23_P69810    | 1.02 ± 0.84  | 1.70 |
| <b>FXRD6</b>        | FXRD domain containing ion transport regulator 6         | 53826     | A_23_P150394   | -1.02 ± 0.82 | 1.77 |
| <b>RAD51AP1</b>     | RAD51 associated protein 1                               | 10635     | A_23_P99292    | 1.02 ± 0.77  | 1.95 |
| <b>CCNA2</b>        | cyclin A2                                                | 890       | A_23_P58321    | 1.02 ± 0.76  | 1.98 |
| <b>LOC100130417</b> | uncharacterized LOC100130417                             |           | A_19_P00320067 | -1.02 ± 0.74 | 2.03 |
| <b>CCNB1</b>        | cyclin B1                                                | 891       | A_23_P122197   | 1.02 ± 0.73  | 2.11 |
| <b>TPX2</b>         | TPX2, microtubule-associated                             | 22974     | A_23_P68610    | 1.02 ± 0.71  | 2.17 |
| <b>EML1</b>         | echinoderm microtubule associated protein like 1         | 2009      | A_23_P205746   | 1.02 ± 0.69  | 2.29 |
| <b>LTBP1</b>        | latent transforming growth factor beta binding protein 1 | 4052      | A_23_P43810    | 1.02 ± 0.69  | 2.26 |
| <b>VLDLR</b>        | very low density lipoprotein receptor                    | 7436      | A_23_P43476    | -1.02 ± 0.53 | 3.27 |
| <b>PI16</b>         | peptidase inhibitor 16                                   | 221476    | A_33_P3215640  | -1.01 ± 1.94 | 0.53 |
| <b>ICAM1</b>        | intercellular adhesion molecule 1                        | 3383      | A_23_P153320   | -1.01 ± 1.10 | 1.14 |
| <b>SAMD5</b>        | sterile alpha motif domain containing 5                  | 389432    | A_24_P602871   | 1.01 ± 1.08  | 1.19 |
| <b>C10orf107</b>    | chromosome 10 open reading frame 107                     | 219621    | A_32_P8156     | 1.01 ± 1.03  | 1.26 |
| <b>ADCY4</b>        | adenylate cyclase 4                                      | 196883    | A_23_P381261   | 1.01 ± 1.00  | 1.30 |
| <b>FAM180A</b>      | family with sequence similarity 180, member A            | 389558    | A_32_P204218   | 1.01 ± 0.98  | 1.36 |
| <b>ANLN</b>         | anillin, actin binding protein                           | 54443     | A_23_P356684   | 1.01 ± 0.97  | 1.37 |
| <b>LRCOL1</b>       | leucine rich colipase-like 1                             | 100507055 | A_32_P49867    | 1.01 ± 0.94  | 1.43 |
| <b>POLE2</b>        | polymerase (DNA directed), epsilon 2, accessory subunit  | 5427      | A_23_P163099   | 1.01 ± 0.92  | 1.49 |
| <b>CENPL</b>        | centromere protein L                                     | 91687     | A_23_P126120   | 1.01 ± 0.92  | 1.49 |

|                    |                                                                                   |           |               |              |      |
|--------------------|-----------------------------------------------------------------------------------|-----------|---------------|--------------|------|
| <b>MPP4</b>        | membrane protein, palmitoylated 4 (MAGUK p55 subfamily member 4)                  | 58538     | A_33_P3404480 | 1.01 ± 0.88  | 1.57 |
| <b>KIT</b>         | v-kit Hardy-Zuckerman 4 feline sarcoma viral oncogene homolog                     | 3815      | A_23_P110253  | 1.01 ± 0.83  | 1.71 |
| <b>TRIB3</b>       | tribbles pseudokinase 3                                                           | 57761     | A_23_P210690  | -1.01 ± 0.71 | 2.15 |
| <b>CORO2B</b>      | coronin, actin binding protein, 2B                                                | 10391     | A_23_P117694  | 1.01 ± 0.70  | 2.16 |
| <b>ARHGAP44</b>    | Rho GTPase activating protein 44                                                  | 9912      | A_23_P26854   | 1.01 ± 0.64  | 2.47 |
| <b>OXTR</b>        | oxytocin receptor                                                                 | 5021      | A_33_P3413741 | -1.00 ± 2.06 | 0.48 |
| <b>PEG10</b>       | paternally expressed 10                                                           | 23089     | A_23_P82503   | 1.00 ± 0.97  | 1.35 |
| <b>SNORD116-11</b> | small nucleolar RNA, C/D box 116-11                                               | 100033423 | A_21_P0000447 | 1.00 ± 0.78  | 1.86 |
| <b>DLGAP5</b>      | discs, large (Drosophila) homolog-associated protein 5                            | 9787      | A_23_P88331   | 1.00 ± 0.75  | 1.97 |
| <b>CCNB2</b>       | cyclin B2                                                                         | 9133      | A_23_P65757   | 1.00 ± 0.70  | 2.18 |
| <b>CSF2RB</b>      | colony stimulating factor 2 receptor, beta, low-affinity (granulocyte-macrophage) | 1439      | A_23_P120899  | -1.00 ± 0.68 | 2.24 |
| <b>LOC221122</b>   | uncharacterized LOC221122                                                         | 221122    | A_33_P3347887 | 1.00 ± 0.49  | 3.57 |

**Supplementary Table S4.** Functional involvement of genes commonly regulated in lung homogenates and fibroblasts after pirfenidone treatment.

| Gene name             |                                                        | Functional involvement                                                                                                                                                                  |
|-----------------------|--------------------------------------------------------|-----------------------------------------------------------------------------------------------------------------------------------------------------------------------------------------|
| <b>A_22_P00006233</b> | -                                                      | not known                                                                                                                                                                               |
| <b>GPR128</b>         | G protein-coupled receptor 128                         | orphan receptor                                                                                                                                                                         |
| <b>GREM2</b>          | Gremlin-2                                              | regulation of BMP2/4 activity, embryonic morphogenesis, progesterone production in granulosa cells                                                                                      |
| <b>GSTT2</b>          | Glutathione S-transferase theta-2B                     | glutathione transferase activity, sulfatase activity                                                                                                                                    |
| <b>AGRG7</b>          | Adhesion G-protein coupled receptor G7                 | orphan receptor                                                                                                                                                                         |
| <b>CEMIP</b>          | Cell migration-inducing and hyaluronan-binding protein | interaction with hyaluronic acid (HA), hyaluronan catabolism, positive regulator of epithelial-mesenchymal transistion, tumor cell growth, invasion, migration and cancer dissemination |
| <b>KCNG1</b>          | Potassium voltage-gated channel subfamily G member 1   | potassium channel subunit, modulates potassium channel activation and deactivation rates of KCNB1                                                                                       |
| <b>MFAP5</b>          | Microfibrillar-associated protein 5                    | hematopoiesis, regulation of growth factors and cell signaling in cardiovascular system, component of the elastin-associated microfibrils                                               |
| <b>TEN2</b>           | Teneurin-2                                             | neural development, homophilic cell-cell adhesion, cellular signal transducer                                                                                                           |
| <b>SCRG1</b>          | Scrapie-responsive protein 1                           | acts against the prion protein, scrapie                                                                                                                                                 |
| <b>HRK</b>            | Activator of apoptosis harakiri                        | apoptosis                                                                                                                                                                               |



**Supplementary Table S5.** Genes related to hyaluronic acid metabolism and signaling being regulated in IPF LH after pirfenidone treatment.

| GENE SYMBOL   | GENE NAME                                     | ENTREZ ID | SPOT ID       | mean log <sub>2</sub> (fold-change) ± the half width of the 95% confidence interval | -log <sub>10</sub> (P-value) |
|---------------|-----------------------------------------------|-----------|---------------|-------------------------------------------------------------------------------------|------------------------------|
| <b>HAS1</b>   | hyaluronan synthase 1                         | 3036      | A_33_P3295203 | -1.42 ± 1.39                                                                        | 1.35                         |
| <b>HMMR</b>   | hyaluronan-mediated motility receptor (RHAMM) | 3161      | A_23_P70007   | -1.33 ± 0.97                                                                        | 2.05                         |
| <b>HAPLN4</b> | hyaluronan and proteoglycan link protein 4    | 404037    | A_23_P430842  | -0.68 ± 0.59                                                                        | 1.62                         |
| <b>HABP2</b>  | hyaluronan binding protein 2                  | 3026      | A_23_P1173    | 1.07 ± 0.80                                                                         | 1.96                         |

**Supplementary Table S6.** Genes related to hyaluronic acid metabolism and signaling being regulated in IPF FB after pirfenidone treatment.

| GENE SYMBOL   | GENE NAME                                           | ENTREZ ID | SPOT ID       | mean log <sub>2</sub> (fold-change) ± the half width of the 95% confidence interval | -log <sub>10</sub> (P-value) |
|---------------|-----------------------------------------------------|-----------|---------------|-------------------------------------------------------------------------------------|------------------------------|
| <b>ITIH3</b>  | inter-alpha-trypsin inhibitor heavy chain 3         | 3699      | A_33_P3313145 | -1.83 ± 0.78                                                                        | 4.24                         |
| <b>CEMIP</b>  | cell migration inducing protein, hyaluronan binding | 57214     | A_23_P324754  | -1.13 ± 0.99                                                                        | 1.58                         |
| <b>HAPLN4</b> | hyaluronan and proteoglycan link protein 4          | 404037    | A_23_P430842  | -0.60 ± 0.50                                                                        | 1.70                         |
| <b>CD44</b>   | CD44 molecule (Indian blood group)                  | 960       | A_33_P3294509 | 0.69 ± 0.46                                                                         | 2.31                         |
| <b>HMMR</b>   | hyaluronan-mediated motility receptor (RHAMM)       | 3161      | A_23_P70007   | 0.98 ± 0.82                                                                         | 1.67                         |

**Supplementary Table S7.** Annotated genes regulated in IPF FB upon pirfenidone treatment *in vitro*.

| GENE SYMBOL | GENE NAME                                                                  | ENTREZ ID | SPOT ID       | mean log <sub>2</sub> (fold-change) ± the half width of the 95% confidence interval | -log <sub>10</sub> (P-value) |
|-------------|----------------------------------------------------------------------------|-----------|---------------|-------------------------------------------------------------------------------------|------------------------------|
| <b>MYCL</b> | v-myc avian myelocytomatosis viral oncogene lung carcinoma derived homolog | 4610      | A_33_P3306068 | 3.15 ± 1.11                                                                         | 5.21                         |
| <b>NGFR</b> | nerve growth factor receptor                                               | 4804      | A_23_P389897  | 3.09 ± 0.66                                                                         | 8.78                         |

|                     |                                                                        |           |                |              |      |
|---------------------|------------------------------------------------------------------------|-----------|----------------|--------------|------|
| <b>LOC101927057</b> | uncharacterized LOC101927057                                           |           | A_21_P0014360  | -3.05 ± 1.60 | 3.18 |
| <b>CYR61</b>        | cysteine-rich, angiogenic inducer, 61                                  | 3491      | A_23_P46429    | -3.03 ± 0.77 | 7.48 |
| <b>C10orf10</b>     | chromosome 10 open reading frame 10                                    | 11067     | A_24_P329795   | -2.98 ± 0.57 | 9.69 |
| <b>EGR2</b>         | early growth response 2                                                | 1959      | A_23_P46936    | -2.95 ± 0.93 | 5.93 |
| <b>RRAD</b>         | Ras-related associated with diabetes                                   | 6236      | A_24_P262127   | -2.84 ± 0.62 | 8.72 |
| <b>PDE4D</b>        | phosphodiesterase 4D, cAMP-specific                                    | 5144      | A_33_P3389653  | 2.81 ± 0.57  | 9.29 |
| <b>RNF150</b>       | ring finger protein 150                                                | 57484     | A_24_P350589   | 2.75 ± 0.90  | 5.71 |
| <b>KCNE4</b>        | potassium channel, voltage gated subfamily E regulatory beta subunit 4 | 23704     | A_33_P3246448  | 2.66 ± 1.00  | 4.85 |
| <b>MIR143HG</b>     | MIR143 host gene (non-protein coding)                                  |           | A_19_P00324470 | -2.62 ± 0.82 | 6.03 |
| <b>BMF</b>          | Bcl2 modifying factor                                                  | 90427     | A_23_P379649   | -2.62 ± 0.70 | 7.13 |
| <b>HTR2B</b>        | 5-hydroxytryptamine (serotonin) receptor 2B, G protein-coupled         | 3357      | A_23_P16953    | -2.57 ± 1.02 | 4.55 |
| <b>KCNJ2</b>        | potassium channel, inwardly rectifying subfamily J, member 2           | 3759      | A_23_P329261   | -2.54 ± 0.75 | 6.43 |
| <b>MIR503HG</b>     | MIR503 host gene (non-protein coding)                                  | 84848     | A_33_P3402329  | -2.49 ± 0.66 | 7.22 |
| <b>COX8C</b>        | cytochrome c oxidase subunit IIIC                                      | 341947    | A_33_P3372069  | 2.44 ± 0.90  | 4.97 |
| <b>FRMD6-AS2</b>    | FRMD6 antisense RNA 2                                                  | 100874185 | A_22_P00013581 | 2.38 ± 0.61  | 7.41 |
| <b>HSPA4L</b>       | heat shock 70kDa protein 4-like                                        | 22824     | A_23_P363936   | 2.37 ± 0.86  | 5.06 |
| <b>SLC16A14</b>     | solute carrier family 16, member 14                                    | 151473    | A_24_P342829   | 2.36 ± 1.19  | 3.36 |
| <b>SLC16A9</b>      | solute carrier family 16, member 9                                     | 220963    | A_23_P115726   | 2.35 ± 0.68  | 6.58 |
| <b>EGR3</b>         | early growth response 3                                                | 1960      | A_23_P216225   | -2.34 ± 0.83 | 5.20 |
| <b>KRTAP1-5</b>     | keratin associated protein 1-5                                         | 83895     | A_23_P118842   | -2.30 ± 1.53 | 2.30 |
| <b>ATP6V0D2</b>     | ATPase, H <sup>+</sup> transporting, lysosomal 38kDa, V0 subunit d2    | 245972    | A_23_P146146   | 2.29 ± 0.66  | 6.55 |
| <b>SLC6A13</b>      | solute carrier family 6 (neurotransmitter transporter), member 13      | 6540      | A_21_P0000624  | 2.24 ± 0.54  | 7.88 |
| <b>HSPB3</b>        | heat shock 27kDa protein 3                                             | 8988      | A_23_P92730    | -2.22 ± 1.37 | 2.53 |
| <b>CTGF</b>         | connective tissue growth factor                                        | 1490      | A_23_P19663    | -2.22 ± 0.92 | 4.31 |
| <b>CRB1</b>         | crumbs family member 1, photoreceptor morphogenesis associated         | 23418     | A_24_P196528   | 2.22 ± 0.49  | 8.53 |
| <b>MAT2A</b>        | methionine adenosyltransferase II, alpha                               | 4144      | A_23_P401568   | -2.21 ± 0.49 | 8.50 |
| <b>KIT</b>          | v-kit Hardy-Zuckerman 4 feline sarcoma viral oncogene homolog          | 3815      | A_23_P110253   | -2.19 ± 1.20 | 3.00 |
| <b>FMO2</b>         | flavin containing monooxygenase 2 (non-functional)                     | 2327      | A_33_P3275702  | -2.17 ± 1.54 | 2.10 |
| <b>GAREM</b>        | GRB2 associated, regulator of MAPK1                                    | 64762     | A_23_P66948    | 2.14 ± 0.68  | 5.90 |
| <b>PTPN3</b>        | protein tyrosine phosphatase, non-receptor type 3                      | 5774      | A_22_P00025093 | 2.12 ± 0.87  | 4.34 |

|                     |                                                                                  |           |               |              |       |
|---------------------|----------------------------------------------------------------------------------|-----------|---------------|--------------|-------|
| <b>MADCAM1</b>      | mucosal vascular addressin cell adhesion molecule 1                              | 8174      | A_23_P153616  | 2.12 ± 0.48  | 8.39  |
| <b>ACVR1C</b>       | activin A receptor, type IC                                                      | 130399    | A_23_P397455  | 2.11 ± 0.66  | 6.02  |
| <b>HMGCS1</b>       | 3-hydroxy-3-methylglutaryl-CoA synthase 1 (soluble)                              | 3157      | A_24_P63522   | -2.08 ± 0.75 | 5.05  |
| <b>ADH1C</b>        | alcohol dehydrogenase 1C (class I), gamma polypeptide                            | 126       | A_23_P81158   | -2.07 ± 1.55 | 1.95  |
| <b>FBXL14</b>       | F-box and leucine-rich repeat protein 14                                         | 144699    | A_23_P36724   | 2.05 ± 0.53  | 7.38  |
| <b>PDE4B</b>        | phosphodiesterase 4B, cAMP-specific                                              | 5142      | A_23_P74278   | 2.03 ± 0.60  | 6.38  |
| <b>CACNB2</b>       | calcium channel, voltage-dependent, beta 2 subunit                               | 783       | A_33_P3363271 | 2.01 ± 0.57  | 6.72  |
| <b>EPS8L1</b>       | EPS8-like 1                                                                      | 54869     | A_33_P3220698 | -2.00 ± 0.76 | 4.77  |
| <b>TNFAIP6</b>      | tumor necrosis factor, alpha-induced protein 6                                   | 7130      | A_23_P165624  | 1.96 ± 0.81  | 4.35  |
| <b>LAMB2P1</b>      | laminin, beta 2 pseudogene 1                                                     |           | A_33_P3413815 | 1.93 ± 0.75  | 4.68  |
| <b>ARID5A</b>       | AT rich interactive domain 5A (MRF1-like)                                        | 10865     | A_23_P143016  | -1.91 ± 0.56 | 6.48  |
| <b>ATE1-AS1</b>     | ATE1 antisense RNA 1 (head to head)                                              | 100130887 | A_33_P3340752 | 1.90 ± 1.46  | 1.87  |
| <b>FABP3</b>        | fatty acid binding protein 3, muscle and heart                                   | 2170      | A_24_P62783   | -1.90 ± 1.18 | 2.53  |
| <b>LINC00968</b>    | lincRNA 968                                                                      | 100507632 | A_21_P0000731 | -1.89 ± 1.23 | 2.35  |
| <b>CMTM8</b>        | CKLF-like MARVEL transmembrane domain containing 8                               | 152189    | A_23_P40880   | 1.88 ± 0.59  | 6.00  |
| <b>LINC01569</b>    | lincRNA 1569                                                                     | 100507501 | A_21_P0009120 | 1.87 ± 0.49  | 7.20  |
| <b>TUBE1</b>        | tubulin, epsilon 1                                                               | 51175     | A_33_P3240538 | 1.87 ± 0.42  | 8.34  |
| <b>LOC101927067</b> | uncharacterized LOC101927067                                                     | 101927067 | A_21_P0014218 | 1.86 ± 0.65  | 5.31  |
| <b>LINC00473</b>    | lincRNA 473                                                                      | 90632     | A_32_P8546    | 1.85 ± 0.99  | 3.07  |
| <b>EGR1</b>         | early growth response 1                                                          | 1958      | A_23_P214080  | -1.85 ± 0.87 | 3.67  |
| <b>MYBL1</b>        | v-myb avian myeloblastosis viral oncogene homolog-like 1                         | 4603      | A_23_P43157   | 1.85 ± 0.80  | 4.04  |
| <b>BMP6</b>         | bone morphogenetic protein 6                                                     | 654       | A_23_P19624   | 1.85 ± 0.77  | 4.26  |
| <b>LINC00622</b>    | lincRNA 622                                                                      | 644242    | A_21_P0000663 | 1.84 ± 0.58  | 6.00  |
| <b>WWTR1</b>        | WW domain containing transcription regulator 1                                   | 25937     | A_23_P29769   | 1.84 ± 0.54  | 6.48  |
| <b>NHS</b>          | Nance-Horan syndrome (congenital cataracts and dental anomalies)                 | 4810      | A_32_P126375  | 1.83 ± 0.57  | 6.05  |
| <b>SLC7A5</b>       | solute carrier family 7 (amino acid transporter light chain, L system), member 5 | 8140      | A_24_P335620  | 1.82 ± 0.74  | 4.42  |
| <b>NUFIP2</b>       | nuclear fragile X mental retardation protein interacting protein 2               | 57532     | A_24_P791829  | -1.81 ± 0.32 | 10.56 |
| <b>ADH1A</b>        | alcohol dehydrogenase 1A (class I), alpha polypeptide                            | 124       | A_24_P291658  | -1.80 ± 1.43 | 1.78  |
| <b>RBM26-AS1</b>    | RBM26 antisense RNA 1                                                            | 100505538 | A_33_P6815667 | 1.80 ± 0.81  | 3.86  |

|                     |                                                                         |           |                |              |      |
|---------------------|-------------------------------------------------------------------------|-----------|----------------|--------------|------|
| <b>FUT4</b>         | fucosyltransferase 4 (alpha (1,3) fucosyltransferase, myeloid-specific) | 2526      | A_33_P3286536  | -1.80 ± 0.73 | 4.38 |
| <b>NCOA7</b>        | nuclear receptor coactivator 7                                          | 135112    | A_24_P12435    | 1.80 ± 0.39  | 8.78 |
| <b>ZNF433</b>       | zinc finger protein 433                                                 | 163059    | A_23_P27649    | 1.79 ± 0.63  | 5.24 |
| <b>TSPYL4</b>       | TSPY-like 4                                                             | 23270     | A_23_P110882   | -1.79 ± 0.49 | 6.98 |
| <b>SEC1P</b>        | secretory blood group 1, pseudogene                                     | 653677    | A_33_P3548860  | 1.78 ± 0.84  | 3.67 |
| <b>C17orf51</b>     | chromosome 17 open reading frame 51                                     | 339263    | A_24_P59607    | 1.78 ± 0.41  | 8.28 |
| <b>GOLGA6L6</b>     | golgin A6 family-like 6                                                 | 727832    | A_24_P50972    | 1.77 ± 0.84  | 3.63 |
| <b>RIMBP3</b>       | RIMS binding protein 3                                                  | 85376     | A_23_P154962   | 1.77 ± 0.78  | 3.95 |
| <b>C11orf96</b>     | chromosome 11 open reading frame 96                                     | 387763    | A_32_P74409    | 1.75 ± 0.82  | 3.66 |
| <b>ARRDC3</b>       | arrestin domain containing 3                                            | 57561     | A_24_P274615   | 1.74 ± 0.52  | 6.33 |
| <b>DNAJB9</b>       | DnaJ (Hsp40) homolog, subfamily B, member 9                             | 4189      | A_23_P258944   | 1.74 ± 0.37  | 8.80 |
| <b>FAM227B</b>      | family with sequence similarity 227, member B                           | 196951    | A_33_P3361758  | 1.72 ± 0.73  | 4.19 |
| <b>HMGB2</b>        | high mobility group box 2                                               | 3148      | A_23_P155765   | 1.72 ± 0.43  | 7.59 |
| <b>DDIT4L</b>       | DNA-damage-inducible transcript 4-like                                  | 115265    | A_33_P3372099  | -1.70 ± 0.50 | 6.42 |
| <b>HSPA1A</b>       | heat shock 70kDa protein 1A                                             | 3303      | A_23_P111132   | -1.70 ± 0.48 | 6.79 |
| <b>ITPRIP</b>       | inositol 1,4,5-trisphosphate receptor interacting protein               | 85450     | A_23_P340333   | 1.69 ± 0.66  | 4.67 |
| <b>LOC101927571</b> | uncharacterized LOC101927571                                            | 101927571 | A_22_P00004635 | 1.68 ± 0.58  | 5.37 |
| <b>OSBPL6</b>       | oxysterol binding protein-like 6                                        | 114880    | A_23_P108823   | 1.67 ± 0.34  | 9.23 |
| <b>FGD4</b>         | FYVE, RhoGEF and PH domain containing 4                                 | 121512    | A_24_P158946   | -1.66 ± 0.85 | 3.30 |
| <b>NEAT1</b>        | nuclear paraspeckle assembly transcript 1 (non-protein coding)          | 283131    | A_19_P00321332 | -1.66 ± 0.65 | 4.63 |
| <b>CCR1</b>         | chemokine (C-C motif) receptor 1                                        | 1230      | A_24_P148717   | -1.65 ± 0.99 | 2.65 |
| <b>FRMPD4</b>       | FERM and PDZ domain containing 4                                        | 9758      | A_24_P672240   | 1.65 ± 0.91  | 2.99 |
| <b>NIM1K</b>        | NIM1 serine/threonine protein kinase                                    | 167359    | A_23_P254863   | 1.65 ± 0.74  | 3.87 |
| <b>TNFRSF12A</b>    | tumor necrosis factor receptor superfamily, member 12A                  | 51330     | A_23_P49338    | -1.65 ± 0.65 | 4.57 |
| <b>CDC42EP2</b>     | CDC42 effector protein (Rho GTPase binding) 2                           | 10435     | A_23_P1602     | -1.64 ± 0.39 | 8.01 |
| <b>PLEKHA6</b>      | pleckstrin homology domain containing, family A member 6                | 22874     | A_23_P431268   | -1.63 ± 0.76 | 3.70 |
| <b>USP3-AS1</b>     | USP3 antisense RNA 1                                                    |           | A_22_P00007632 | 1.63 ± 0.66  | 4.48 |
| <b>FRMD4A</b>       | FERM domain containing 4A                                               | 55691     | A_23_P22352    | -1.62 ± 0.98 | 2.60 |
| <b>HIC1</b>         | hypermethylated in cancer 1                                             | 3090      | A_23_P129856   | -1.62 ± 0.64 | 4.57 |
| <b>LINC01301</b>    | lincRNA 1301                                                            |           | A_21_P0005840  | 1.62 ± 0.63  | 4.63 |

|                     |                                                                            |           |                |              |      |
|---------------------|----------------------------------------------------------------------------|-----------|----------------|--------------|------|
| <b>HEXIM1</b>       | hexamethylene bis-acetamide inducible 1                                    | 10614     | A_24_P356601   | -1.62 ± 0.43 | 7.09 |
| <b>TNFSF4</b>       | tumor necrosis factor (ligand) superfamily, member 4                       | 7292      | A_23_P126836   | 1.61 ± 0.51  | 5.93 |
| <b>IER2</b>         | immediate early response 2                                                 | 9592      | A_32_P36235    | -1.61 ± 0.47 | 6.46 |
| <b>NUPR1L</b>       | nuclear protein, transcriptional regulator, 1-like                         | 389493    | A_32_P42964    | 1.61 ± 0.33  | 9.05 |
| <b>HEY1</b>         | hes-related family bHLH transcription factor with YRPW motif 1             | 23462     | A_32_P83845    | 1.60 ± 0.82  | 3.27 |
| <b>OSGIN2</b>       | oxidative stress induced growth inhibitor family member 2                  | 734       | A_23_P82859    | 1.59 ± 0.80  | 3.36 |
| <b>SNRNP35</b>      | small nuclear ribonucleoprotein 35kDa (U11/U12)                            | 11066     | A_23_P159101   | -1.59 ± 0.32 | 9.28 |
| <b>FOSL1</b>        | FOS-like antigen 1                                                         | 8061      | A_23_P161624   | -1.58 ± 0.99 | 2.49 |
| <b>GUCY1A3</b>      | guanylate cyclase 1, soluble, alpha 3                                      | 2982      | A_23_P69573    | -1.58 ± 0.97 | 2.58 |
| <b>ADORA2B</b>      | adenosine A2b receptor                                                     | 136       | A_23_P55477    | 1.58 ± 0.69  | 4.01 |
| <b>MIR4458HG</b>    | MIR4458 host gene (non-protein coding)                                     | 100505738 | A_22_P00010295 | -1.58 ± 0.65 | 4.34 |
| <b>GATAD2B</b>      | GATA zinc finger domain containing 2B                                      | 57459     | A_33_P3323822  | -1.58 ± 0.64 | 4.40 |
| <b>SNAPC1</b>       | small nuclear RNA activating complex, polypeptide 1, 43kDa                 | 6617      | A_22_P00019571 | 1.58 ± 0.48  | 6.24 |
| <b>FAM43A</b>       | family with sequence similarity 43, member A                               | 131583    | A_33_P3410589  | -1.57 ± 0.67 | 4.12 |
| <b>NCK1-AS1</b>     | NCK1 antisense RNA 1 (head to head)                                        |           | A_21_P0014119  | 1.57 ± 0.59  | 4.88 |
| <b>LOC101927895</b> | uncharacterized LOC101927895                                               |           | A_22_P00010200 | 1.57 ± 0.54  | 5.34 |
| <b>ASB2</b>         | ankyrin repeat and SOCS box containing 2                                   | 51676     | A_23_P205370   | -1.56 ± 0.76 | 3.49 |
| <b>LOC100289495</b> | uncharacterized LOC100289495                                               |           | A_21_P0013047  | 1.56 ± 0.54  | 5.31 |
| <b>KCNQ1</b>        | potassium channel, voltage gated modifier subfamily G, member 1            | 3755      | A_22_P00005343 | 1.55 ± 0.57  | 5.02 |
| <b>SLC22A18AS</b>   | solute carrier family 22 (organic cation transporter), member 18 antisense | 5003      | A_33_P3316587  | 1.54 ± 1.15  | 1.94 |
| <b>CRISPLD2</b>     | cysteine-rich secretory protein LCCL domain containing 2                   | 83716     | A_23_P106602   | 1.54 ± 0.87  | 2.87 |
| <b>RAB39B</b>       | RAB39B, member RAS oncogene family                                         | 116442    | A_24_P408603   | 1.54 ± 0.77  | 3.38 |
| <b>C18orf65</b>     | chromosome 18 open reading frame 65                                        |           | A_33_P3311165  | 1.54 ± 0.44  | 6.55 |
| <b>STX19</b>        | syntaxin 19                                                                | 415117    | A_33_P3269208  | 1.53 ± 0.81  | 3.12 |
| <b>ADAP2</b>        | ArfGAP with dual PH domains 2                                              | 55803     | A_23_P49816    | 1.53 ± 0.69  | 3.86 |
| <b>PSAT1</b>        | phosphoserine aminotransferase 1                                           | 29968     | A_23_P259692   | 1.53 ± 0.60  | 4.58 |
| <b>KLHL9</b>        | kelch-like family member 9                                                 | 55958     | A_23_P83159    | -1.53 ± 0.37 | 7.97 |
| <b>ADCY10P1</b>     | adenylate cyclase 10 (soluble) pseudogene 1                                | 221442    | A_24_P303420   | 1.52 ± 0.79  | 3.20 |
| <b>ZNF441</b>       | zinc finger protein 441                                                    | 126068    | A_33_P3397323  | 1.52 ± 0.45  | 6.36 |

|                     |                                                                              |           |                |              |      |
|---------------------|------------------------------------------------------------------------------|-----------|----------------|--------------|------|
| <b>MCTP1</b>        | multiple C2 domains, transmembrane 1                                         | 79772     | A_23_P133293   | 1.51 ± 0.88  | 2.74 |
| <b>DENND5B</b>      | DENN/MADD domain containing 5B                                               | 160518    | A_24_P541919   | 1.51 ± 0.57  | 4.86 |
| <b>C17orf82</b>     | chromosome 17 open reading frame 82                                          |           | A_33_P3417195  | -1.51 ± 0.57 | 4.80 |
| <b>PCDH18</b>       | protocadherin 18                                                             | 54510     | A_33_P3250348  | -1.50 ± 0.86 | 2.81 |
| <b>ZCCHC2</b>       | zinc finger, CCHC domain containing 2                                        |           | A_22_P00017844 | 1.49 ± 0.95  | 2.42 |
| <b>CARD8-AS1</b>    | CARD8 antisense RNA 1                                                        | 100505812 | A_22_P00017991 | -1.49 ± 0.62 | 4.31 |
| <b>ZSCAN20</b>      | zinc finger and SCAN domain containing 20                                    | 7579      | A_23_P23102    | -1.49 ± 0.62 | 4.26 |
| <b>SLC33A1</b>      | solute carrier family 33 (acetyl-CoA transporter), member 1                  | 9197      | A_33_P3251108  | 1.49 ± 0.57  | 4.77 |
| <b>MAP2K6</b>       | mitogen-activated protein kinase kinase 6                                    | 5608      | A_23_P207445   | 1.49 ± 0.55  | 4.99 |
| <b>MYBPH</b>        | myosin binding protein H                                                     | 4608      | A_23_P148737   | -1.48 ± 1.07 | 2.04 |
| <b>SLC1A4</b>       | solute carrier family 1 (glutamate/neutral amino acid transporter), member 4 | 6509      | A_24_P191312   | 1.48 ± 0.65  | 3.99 |
| <b>LOC100505912</b> | uncharacterized LOC100505912                                                 |           | A_21_P0000697  | 1.48 ± 0.62  | 4.27 |
| <b>NEXN</b>         | nexilin (F actin binding protein)                                            | 91624     | A_23_P200001   | -1.48 ± 0.39 | 7.13 |
| <b>ZNF784</b>       | zinc finger protein 784                                                      | 147808    | A_33_P3230399  | -1.48 ± 0.31 | 9.09 |
| <b>TMPRSS4</b>      | transmembrane protease, serine 4                                             | 56649     | A_33_P3296846  | -1.47 ± 2.04 | 0.80 |
| <b>FAM169A</b>      | family with sequence similarity 169, member A                                | 26049     | A_23_P423074   | 1.47 ± 0.69  | 3.63 |
| <b>TBC1D31</b>      | TBC1 domain family, member 31                                                | 93594     | A_23_P334218   | 1.47 ± 0.52  | 5.22 |
| <b>CSGALNACT2</b>   | chondroitin sulfate N-acetylgalactosaminyltransferase 2                      | 55454     | A_23_P149892   | 1.47 ± 0.41  | 6.74 |
| <b>PPIL6</b>        | peptidylprolyl isomerase (cyclophilin)-like 6                                | 285755    | A_23_P111361   | 1.45 ± 0.92  | 2.47 |
| <b>FAM46C</b>       | family with sequence similarity 46, member C                                 | 54855     | A_33_P3314176  | -1.45 ± 0.62 | 4.14 |
| <b>ZNF33B</b>       | zinc finger protein 33B                                                      | 7582      | A_33_P3296871  | -1.45 ± 0.36 | 7.65 |
| <b>KCNK1</b>        | potassium channel, two pore domain subfamily K, member 1                     | 3775      | A_23_P126075   | 1.44 ± 0.87  | 2.63 |
| <b>C3orf52</b>      | chromosome 3 open reading frame 52                                           | 79669     | A_23_P58009    | -1.44 ± 0.67 | 3.71 |
| <b>TRIM47</b>       | tripartite motif containing 47                                               | 91107     | A_33_P3235053  | -1.44 ± 0.61 | 4.19 |
| <b>KLF4</b>         | Kruppel-like factor 4 (gut)                                                  | 9314      | A_23_P32233    | 1.44 ± 0.60  | 4.33 |
| <b>C4orf46</b>      | chromosome 4 open reading frame 46                                           | 201725    | A_33_P3344243  | -1.44 ± 0.36 | 7.63 |
| <b>GLI1</b>         | GLI family zinc finger 1                                                     | 2735      | A_23_P105251   | -1.43 ± 1.02 | 2.07 |
| <b>NOTCH4</b>       | notch 4                                                                      | 4855      | A_23_P365614   | -1.43 ± 0.72 | 3.37 |
| <b>CCNO</b>         | cyclin O                                                                     | 10309     | A_23_P92860    | 1.43 ± 0.68  | 3.60 |

|                     |                                                                  |           |                |              |      |
|---------------------|------------------------------------------------------------------|-----------|----------------|--------------|------|
| <b>TMEM170A</b>     | transmembrane protein 170A                                       | 124491    | A_23_P100517   | 1.42 ± 0.70  | 3.40 |
| <b>LOC100507291</b> | uncharacterized LOC100507291                                     | 100507291 | A_22_P00010168 | 1.42 ± 0.62  | 4.02 |
| <b>THBS1</b>        | thrombospondin 1                                                 | 7057      | A_24_P142118   | -1.42 ± 0.62 | 4.01 |
| <b>MESP1</b>        | mesoderm posterior basic helix-loop-helix transcription factor 1 | 55897     | A_33_P3214466  | 1.42 ± 0.49  | 5.40 |
| <b>LOC100507437</b> | uncharacterized LOC100507437                                     |           | A_21_P0014544  | 1.42 ± 0.44  | 6.00 |
| <b>SDSL</b>         | serine dehydratase-like                                          | 113675    | A_33_P3227472  | 1.42 ± 0.42  | 6.47 |
| <b>TUBA1A</b>       | tubulin, alpha 1a                                                | 7846      | A_23_P139547   | -1.42 ± 0.29 | 9.14 |
| <b>RTKN2</b>        | rhotekin 2                                                       | 219790    | A_24_P13041    | -1.41 ± 0.80 | 2.86 |
| <b>ZNF285</b>       | zinc finger protein 285                                          | 26974     | A_23_P101319   | 1.41 ± 0.75  | 3.14 |
| <b>SSR4P1</b>       | signal sequence receptor, delta pseudogene 1                     | 728039    | A_33_P3676515  | 1.41 ± 0.74  | 3.18 |
| <b>VLDLR-AS1</b>    | VLDLR antisense RNA 1                                            | 401491    | A_19_P00315804 | 1.41 ± 0.68  | 3.54 |
| <b>ZBED8</b>        | zinc finger, BED-type containing 8                               | 63920     | A_24_P166311   | 1.41 ± 0.49  | 5.38 |
| <b>UHRF1BP1</b>     | UHRF1 binding protein 1                                          | 54887     | A_33_P3313421  | 1.41 ± 0.40  | 6.68 |
| <b>ELL2</b>         | elongation factor, RNA polymerase II, 2                          | 22936     | A_23_P58506    | -1.41 ± 0.31 | 8.63 |
| <b>LRRC32</b>       | leucine rich repeat containing 32                                | 2615      | A_24_P389916   | -1.40 ± 0.98 | 2.14 |
| <b>CRYGN</b>        | crystallin, gamma N                                              | 155051    | A_33_P3461948  | 1.40 ± 0.74  | 3.12 |
| <b>PSMD6-AS2</b>    | PSMD6 antisense RNA 2                                            | 100507062 | A_21_P0000751  | 1.40 ± 0.69  | 3.45 |
| <b>MEIG1</b>        | meiosis/spermiogenesis associated 1                              | 644890    | A_32_P175715   | 1.40 ± 0.61  | 4.06 |
| <b>TMEM79</b>       | transmembrane protein 79                                         | 84283     | A_23_P149259   | 1.40 ± 0.53  | 4.77 |
| <b>PPTC7</b>        | PTC7 protein phosphatase homolog (S. cerevisiae)                 | 160760    | A_23_P306933   | 1.40 ± 0.51  | 5.01 |
| <b>LOC100507291</b> | uncharacterized LOC100507291                                     |           | A_21_P0014120  | 1.40 ± 0.44  | 6.05 |
| <b>BANP</b>         | BTG3 associated nuclear protein                                  | 54971     | A_23_P22263    | 1.40 ± 0.29  | 9.05 |
| <b>ACKR4</b>        | atypical chemokine receptor 4                                    | 51554     | A_23_P6909     | -1.39 ± 1.48 | 1.19 |
| <b>KLHL30</b>       | kelch-like family member 30                                      | 377007    | A_33_P3243702  | -1.39 ± 0.78 | 2.87 |
| <b>KLLN</b>         | killin, p53-regulated DNA replication inhibitor                  | 100144748 | A_33_P3267410  | 1.39 ± 0.75  | 3.04 |
| <b>DUSP1</b>        | dual specificity phosphatase 1                                   | 1843      | A_23_P110712   | 1.39 ± 0.74  | 3.11 |
| <b>HSPA1B</b>       | heat shock 70kDa protein 1B                                      | 3304      | A_33_P3415430  | -1.39 ± 0.61 | 4.01 |
| <b>ASNS</b>         | asparagine synthetase (glutamine-hydrolyzing)                    | 440       | A_23_P145694   | 1.39 ± 0.54  | 4.63 |
| <b>ETNK1</b>        | ethanolamine kinase 1                                            | 55500     | A_33_P3351559  | 1.39 ± 0.35  | 7.51 |
| <b>LOC101060091</b> | uncharacterized LOC101060091                                     |           | A_22_P00014756 | 1.38 ± 1.03  | 1.96 |

|                     |                                                                                  |           |                |              |      |
|---------------------|----------------------------------------------------------------------------------|-----------|----------------|--------------|------|
| <b>TDO2</b>         | tryptophan 2,3-dioxygenase                                                       | 6999      | A_23_P80974    | 1.38 ± 0.92  | 2.27 |
| <b>UNC5B</b>        | unc-5 homolog B (C. elegans)                                                     | 219699    | A_23_P52336    | 1.38 ± 0.77  | 2.92 |
| <b>CEBPB-AS1</b>    | CEBPB antisense RNA 1                                                            |           | A_33_P3781228  | 1.38 ± 0.67  | 3.50 |
| <b>ASH1L-AS1</b>    | ASH1L antisense RNA 1                                                            |           | A_24_P272225   | -1.38 ± 0.52 | 4.86 |
| <b>TAF5</b>         | TAF5 RNA polymerase II, TATA box binding protein (TBP)-associated factor, 100kDa | 6877      | A_23_P52311    | 1.38 ± 0.50  | 5.03 |
| <b>SPRY4-IT1</b>    | SPRY4 intronic transcript 1                                                      | 100642175 | A_22_P00000104 | -1.37 ± 0.99 | 2.03 |
| <b>ATP2B1</b>       | ATPase, Ca++ transporting, plasma membrane 1                                     | 490       | A_33_P3267186  | 1.37 ± 0.80  | 2.74 |
| <b>MIAT</b>         | myocardial infarction associated transcript (non-protein coding)                 | 440823    | A_24_P854492   | -1.37 ± 0.74 | 3.02 |
| <b>GDPD1</b>        | glycerophosphodiester phosphodiesterase domain containing 1                      | 284161    | A_23_P84666    | 1.37 ± 0.50  | 5.02 |
| <b>ANKRD37</b>      | ankyrin repeat domain 37                                                         | 353322    | A_24_P237586   | 1.37 ± 0.46  | 5.58 |
| <b>PPP1R10</b>      | protein phosphatase 1, regulatory subunit 10                                     | 5514      | A_23_P156667   | 1.37 ± 0.34  | 7.59 |
| <b>MEDAG</b>        | mesenteric estrogen-dependent adipogenesis                                       | 84935     | A_23_P99515    | 1.36 ± 1.45  | 1.19 |
| <b>ARL6</b>         | ADP-ribosylation factor-like 6                                                   | 84100     | A_24_P354337   | 1.36 ± 0.83  | 2.60 |
| <b>ARSK</b>         | arylsulfatase family, member K                                                   | 153642    | A_33_P3273664  | 1.36 ± 0.67  | 3.45 |
| <b>EAF2</b>         | ELL associated factor 2                                                          | 55840     | A_23_P252201   | 1.36 ± 0.67  | 3.42 |
| <b>PRKAA2</b>       | protein kinase, AMP-activated, alpha 2 catalytic subunit                         | 5563      | A_32_P94160    | 1.36 ± 0.58  | 4.16 |
| <b>USP12</b>        | ubiquitin specific peptidase 12                                                  | 219333    | A_24_P237613   | 1.36 ± 0.57  | 4.30 |
| <b>ETS2</b>         | v-ets avian erythroblastosis virus E26 oncogene homolog 2                        | 2114      | A_24_P314179   | -1.36 ± 0.54 | 4.48 |
| <b>FICD</b>         | FIC domain containing                                                            | 11153     | A_23_P128246   | 1.36 ± 0.45  | 5.64 |
| <b>ODC1</b>         | ornithine decarboxylase 1                                                        | 4953      | A_23_P165840   | 1.36 ± 0.34  | 7.48 |
| <b>ZHX1-C8orf76</b> | ZHX1-C8orf76 readthrough                                                         | 100533106 | A_33_P3373214  | 1.36 ± 0.33  | 7.79 |
| <b>LINC01436</b>    | lincRNA 1436                                                                     |           | A_22_P00019460 | 1.35 ± 1.12  | 1.69 |
| <b>RCAN2</b>        | regulator of calcineurin 2                                                       | 10231     | A_32_P156851   | -1.35 ± 0.83 | 2.56 |
| <b>SOCS1</b>        | suppressor of cytokine signaling 1                                               | 8651      | A_23_P420196   | -1.35 ± 0.53 | 4.58 |
| <b>ZNF397</b>       | zinc finger protein 397                                                          | 84307     | A_23_P304511   | 1.35 ± 0.42  | 6.01 |
| <b>GPR180</b>       | G protein-coupled receptor 180                                                   | 160897    | A_24_P942481   | 1.35 ± 0.41  | 6.17 |
| <b>TIMM10B</b>      | translocase of inner mitochondrial membrane 10 homolog B (yeast)                 | 26515     | A_33_P3243657  | -1.35 ± 0.34 | 7.53 |
| <b>GADD45A</b>      | growth arrest and DNA-damage-inducible, alpha                                    | 1647      | A_23_P23221    | 1.34 ± 0.52  | 4.72 |
| <b>RORA</b>         | RAR-related orphan receptor A                                                    | 6095      | A_23_P26124    | 1.34 ± 0.48  | 5.09 |



|                   |                                                                      |           |                |              |      |
|-------------------|----------------------------------------------------------------------|-----------|----------------|--------------|------|
| <b>TATDN3</b>     | TatD DNase domain containing 3                                       | 128387    | A_33_P3249773  | 1.34 ± 0.43  | 5.88 |
| <b>ZNF668</b>     | zinc finger protein 668                                              | 79759     | A_33_P3290487  | -1.34 ± 0.30 | 8.59 |
| <b>SNAR-B2</b>    | small ILF3/NF90-associated RNA B2                                    |           | A_21_P0000507  | -1.33 ± 1.53 | 1.06 |
| <b>TUBD1</b>      | tubulin, delta 1                                                     | 51174     | A_23_P26895    | 1.33 ± 0.69  | 3.24 |
| <b>ARL5B</b>      | ADP-ribosylation factor-like 5B                                      | 221079    | A_24_P943997   | 1.33 ± 0.63  | 3.61 |
| <b>TLR6</b>       | toll-like receptor 6                                                 | 10333     | A_23_P256561   | 1.33 ± 0.58  | 4.02 |
| <b>PRELID2</b>    | PRELI domain containing 2                                            | 153768    | A_24_P346101   | -1.33 ± 0.58 | 4.01 |
| <b>MFHAS1</b>     | malignant fibrous histiocytoma amplified sequence 1                  | 9258      | A_33_P3256680  | 1.33 ± 0.54  | 4.45 |
| <b>LBH</b>        | limb bud and heart development                                       | 81606     | A_23_P120227   | -1.33 ± 0.45 | 5.51 |
| <b>SLC43A2</b>    | solute carrier family 43 (amino acid system L transporter), member 2 | 124935    | A_24_P296508   | 1.33 ± 0.35  | 7.22 |
| <b>SNAR-F</b>     | small ILF3/NF90-associated RNA F                                     |           | A_21_P0000492  | -1.32 ± 1.54 | 1.03 |
| <b>TPPP</b>       | tubulin polymerization promoting protein                             | 11076     | A_33_P3371999  | 1.32 ± 1.28  | 1.35 |
| <b>ERICH2</b>     | glutamate-rich 2                                                     |           | A_32_P197340   | 1.32 ± 1.18  | 1.52 |
| <b>BTBD11</b>     | BTB (POZ) domain containing 11                                       | 121551    | A_23_P419714   | 1.32 ± 0.74  | 2.93 |
| <b>CABLES1</b>    | Cdk5 and Abl enzyme substrate 1                                      | 91768     | A_23_P422851   | 1.32 ± 0.64  | 3.52 |
| <b>C9orf91</b>    | chromosome 9 open reading frame 91                                   | 203197    | A_24_P915196   | 1.32 ± 0.54  | 4.39 |
| <b>ZNF677</b>     | zinc finger protein 677                                              | 342926    | A_33_P3231705  | -1.32 ± 0.45 | 5.39 |
| <b>SMIM12</b>     | small integral membrane protein 12                                   | 113444    | A_33_P3325467  | -1.32 ± 0.40 | 6.16 |
| <b>CYP2R1</b>     | cytochrome P450, family 2, subfamily R, polypeptide 1                | 120227    | A_23_P202860   | 1.32 ± 0.37  | 6.79 |
| <b>OTUD7A</b>     | OTU deubiquitinase 7A                                                | 161725    | A_33_P3262376  | 1.32 ± 0.37  | 6.76 |
| <b>SNAR-H</b>     | small ILF3/NF90-associated RNA H                                     |           | A_21_P0000511  | -1.31 ± 1.53 | 1.04 |
| <b>SNAR-G2</b>    | small ILF3/NF90-associated RNA G2                                    |           | A_21_P0000509  | -1.31 ± 1.45 | 1.12 |
| <b>ZSCAN31</b>    | zinc finger and SCAN domain containing 31                            | 64288     | A_23_P214533   | -1.31 ± 1.19 | 1.49 |
| <b>ZNF341-AS1</b> | ZNF341 antisense RNA 1                                               | 101929746 | A_22_P00012654 | 1.31 ± 0.66  | 3.38 |
| <b>HDAC4</b>      | histone deacetylase 4                                                | 9759      | A_23_P210048   | 1.31 ± 0.66  | 3.32 |
| <b>ANKRD11</b>    | ankyrin repeat domain 11                                             | 29123     | A_33_P3280044  | 1.31 ± 0.50  | 4.80 |
| <b>FAM49A</b>     | family with sequence similarity 49, member A                         | 81553     | A_23_P21560    | 1.31 ± 0.41  | 5.93 |
| <b>FAM107B</b>    | family with sequence similarity 107, member B                        | 83641     | A_23_P149975   | 1.31 ± 0.40  | 6.20 |
| <b>CCAR1</b>      | cell division cycle and apoptosis regulator 1                        | 55749     | A_23_P115842   | -1.31 ± 0.27 | 9.15 |
| <b>SNAR-D</b>     | small ILF3/NF90-associated RNA D                                     |           | A_21_P0000508  | -1.30 ± 1.55 | 1.01 |

|                    |                                                                |           |                |              |      |
|--------------------|----------------------------------------------------------------|-----------|----------------|--------------|------|
| <b>BUB1B</b>       | BUB1 mitotic checkpoint serine/threonine kinase B              | 701       | A_23_P163481   | -1.30 ± 1.10 | 1.63 |
| <b>SOCS7</b>       | suppressor of cytokine signaling 7                             | 30837     | A_24_P367211   | 1.30 ± 0.68  | 3.18 |
| <b>LINC00565</b>   | lincRNA 565                                                    | 100861555 | A_22_P00006915 | 1.30 ± 0.67  | 3.21 |
| <b>CCIN</b>        | calicin                                                        | 881       | A_23_P60227    | -1.30 ± 0.54 | 4.32 |
| <b>TSGA10</b>      | testis specific, 10                                            | 80705     | A_23_P17103    | 1.30 ± 0.54  | 4.28 |
| <b>WDR6</b>        | WD repeat domain 6                                             | 11180     | A_33_P3815560  | -1.30 ± 0.33 | 7.52 |
| <b>ATXN3</b>       | ataxin 3                                                       | 4287      | A_22_P00001843 | -1.30 ± 0.31 | 8.07 |
| <b>GDF10</b>       | growth differentiation factor 10                               | 2662      | A_23_P52227    | -1.29 ± 1.36 | 1.20 |
| <b>CTH</b>         | cystathionine gamma-lyase                                      | 1491      | A_23_P126103   | 1.29 ± 0.66  | 3.30 |
| <b>FRY</b>         | furry homolog (Drosophila)                                     | 10129     | A_23_P105862   | -1.29 ± 0.56 | 4.05 |
| <b>TYSND1</b>      | trypsin domain containing 1                                    | 219743    | A_33_P3351101  | 1.29 ± 0.55  | 4.16 |
| <b>INTS2</b>       | integrator complex subunit 2                                   | 57508     | A_23_P420269   | 1.29 ± 0.48  | 4.91 |
| <b>PLK3</b>        | polo-like kinase 3                                             | 1263      | A_23_P51646    | -1.29 ± 0.43 | 5.61 |
| <b>TUBB4B</b>      | tubulin, beta 4B class IVb                                     | 10383     | A_23_P312863   | -1.29 ± 0.42 | 5.77 |
| <b>LRRN4CL</b>     | LRRN4 C-terminal like                                          | 221091    | A_33_P3221129  | -1.28 ± 0.99 | 1.86 |
| <b>TGFBR3</b>      | transforming growth factor, beta receptor III                  | 7049      | A_23_P200780   | 1.28 ± 0.95  | 1.97 |
| <b>LAMTOR5-AS1</b> | LAMTOR5 antisense RNA 1                                        |           | A_21_P0010545  | 1.28 ± 0.48  | 4.89 |
| <b>ELF1</b>        | ELL associated factor 1                                        | 85403     | A_24_P941930   | 1.28 ± 0.46  | 5.16 |
| <b>HDAC5</b>       | histone deacetylase 5                                          | 10014     | A_24_P125283   | -1.28 ± 0.42 | 5.65 |
| <b>ILF3-AS1</b>    | ILF3 antisense RNA 1 (head to head)                            | 147727    | A_33_P3601163  | -1.28 ± 0.34 | 7.05 |
| <b>INMT</b>        | indolethylamine N-methyltransferase                            | 11185     | A_33_P3347291  | -1.27 ± 1.05 | 1.70 |
| <b>FLJ42351</b>    | uncharacterized LOC400999                                      |           | A_21_P0002674  | 1.27 ± 1.04  | 1.70 |
| <b>DKK1</b>        | dickkopf WNT signaling pathway inhibitor 1                     | 22943     | A_23_P24129    | -1.27 ± 0.82 | 2.38 |
| <b>PRMT3</b>       | protein arginine methyltransferase 3                           | 10196     | A_23_P9894     | 1.27 ± 0.64  | 3.36 |
| <b>C4orf29</b>     | chromosome 4 open reading frame 29                             | 80167     | A_23_P167358   | 1.27 ± 0.62  | 3.47 |
| <b>HMGCR</b>       | 3-hydroxy-3-methylglutaryl-CoA reductase                       | 3156      | A_23_P30495    | -1.27 ± 0.55 | 4.07 |
| <b>BTG1</b>        | B-cell translocation gene 1, anti-proliferative                | 694       | A_22_P00013430 | 1.27 ± 0.44  | 5.29 |
| <b>IP6K2</b>       | inositol hexakisphosphate kinase 2                             | 51447     | A_23_P301138   | -1.27 ± 0.41 | 5.84 |
| <b>RAP2B</b>       | RAP2B, member of RAS oncogene family                           | 5912      | A_33_P3303121  | -1.27 ± 0.40 | 5.95 |
| <b>HTR2A</b>       | 5-hydroxytryptamine (serotonin) receptor 2A, G protein-coupled | 3356      | A_24_P355967   | 1.26 ± 1.06  | 1.65 |

|                   |                                                                                  |           |                |              |      |
|-------------------|----------------------------------------------------------------------------------|-----------|----------------|--------------|------|
| <b>NFATC4</b>     | nuclear factor of activated T-cells, cytoplasmic, calcineurin-dependent 4        | 4776      | A_33_P3250083  | -1.26 ± 0.66 | 3.15 |
| <b>RSRP1</b>      | arginine/serine-rich protein 1                                                   | 57035     | A_23_P34396    | 1.26 ± 0.38  | 6.28 |
| <b>HEIH</b>       | hepatocellular carcinoma up-regulated EZH2-associated long non-coding RNA        | 100859930 | A_22_P00009905 | 1.26 ± 0.28  | 8.56 |
| <b>TMEM100</b>    | transmembrane protein 100                                                        | 55273     | A_23_P15450    | 1.25 ± 0.85  | 2.21 |
| <b>ZNF391</b>     | zinc finger protein 391                                                          | 346157    | A_33_P3220090  | 1.25 ± 0.80  | 2.44 |
| <b>TAF15</b>      | TAF15 RNA polymerase II, TATA box binding protein (TBP)-associated factor, 68kDa | 8148      | A_23_P159305   | -1.25 ± 0.71 | 2.85 |
| <b>GCNT1</b>      | glucosaminyl (N-acetyl) transferase 1, core 2                                    | 2650      | A_33_P3282489  | -1.25 ± 0.61 | 3.53 |
| <b>WEE1</b>       | WEE1 G2 checkpoint kinase                                                        | 7465      | A_33_P3290567  | -1.25 ± 0.48 | 4.75 |
| <b>MBLAC2</b>     | metallo-beta-lactamase domain containing 2                                       | 153364    | A_33_P3415663  | 1.25 ± 0.42  | 5.50 |
| <b>SNRNP48</b>    | small nuclear ribonucleoprotein 48kDa (U11/U12)                                  | 154007    | A_33_P3404448  | 1.25 ± 0.40  | 5.75 |
| <b>CCDC102B</b>   | coiled-coil domain containing 102B                                               | 79839     | A_23_P44466    | -1.24 ± 1.01 | 1.72 |
| <b>CCDC13-AS1</b> | CCDC13 antisense RNA 1                                                           | 100874114 | A_22_P00008465 | -1.24 ± 0.97 | 1.74 |
| <b>ID1</b>        | inhibitor of DNA binding 1, dominant negative helix-loop-helix protein           | 3397      | A_23_P252306   | 1.24 ± 0.81  | 2.35 |
| <b>PNMA6A</b>     | paraneoplastic Ma antigen family member 6A                                       | 84968     | A_33_P3233436  | -1.24 ± 0.65 | 3.15 |
| <b>CENPJ</b>      | centromere protein J                                                             | 55835     | A_32_P219116   | -1.24 ± 0.47 | 4.86 |
| <b>PTP4A1</b>     | protein tyrosine phosphatase type IVA, member 1                                  | 7803      | A_23_P81770    | 1.24 ± 0.43  | 5.37 |
| <b>ADM</b>        | adrenomedullin                                                                   | 133       | A_23_P127948   | -1.24 ± 0.43 | 5.31 |
| <b>SRXN1</b>      | sulfiredoxin 1                                                                   | 140809    | A_23_P320113   | 1.24 ± 0.40  | 5.82 |
| <b>MAP3K4</b>     | mitogen-activated protein kinase kinase kinase 4                                 | 4216      | A_33_P3245922  | 1.24 ± 0.34  | 6.82 |
| <b>MKX-AS1</b>    | MKX antisense RNA 1                                                              |           | A_22_P00012696 | -1.23 ± 0.85 | 2.18 |
| <b>MTX3</b>       | metaxin 3                                                                        | 345778    | A_33_P3356846  | 1.23 ± 0.77  | 2.48 |
| <b>CCDC121</b>    | coiled-coil domain containing 121                                                | 79635     | A_23_P5742     | 1.23 ± 0.71  | 2.81 |
| <b>C9orf47</b>    | chromosome 9 open reading frame 47                                               | 286223    | A_33_P3379061  | -1.23 ± 0.71 | 2.78 |
| <b>DUSP5</b>      | dual specificity phosphatase 5                                                   | 1847      | A_23_P150018   | -1.23 ± 0.62 | 3.35 |
| <b>DUSP19</b>     | dual specificity phosphatase 19                                                  | 142679    | A_23_P90933    | 1.23 ± 0.54  | 3.96 |
| <b>ST7-AS1</b>    | ST7 antisense RNA 1                                                              | 93653     | A_32_P181297   | -1.23 ± 0.31 | 7.56 |
| <b>SNAR-A3</b>    | small ILF3/NF90-associated RNA A3                                                |           | A_33_P3587376  | -1.22 ± 1.48 | 0.99 |
| <b>ADAMTS4</b>    | ADAM metallopeptidase with thrombospondin type 1 motif, 4                        | 9507      | A_23_P360754   | 1.22 ± 1.47  | 0.99 |

|                     |                                                             |           |               |              |      |
|---------------------|-------------------------------------------------------------|-----------|---------------|--------------|------|
| <b>KIAA0226L</b>    | KIAA0226-like                                               | 80183     | A_23_P53763   | -1.22 ± 1.22 | 1.29 |
| <b>SLCO4A1</b>      | solute carrier organic anion transporter family, member 4A1 | 28231     | A_23_P5903    | 1.22 ± 0.73  | 2.65 |
| <b>KLF10</b>        | Kruppel-like factor 10                                      | 7071      | A_23_P168828  | -1.22 ± 0.67 | 3.02 |
| <b>DDIT3</b>        | DNA-damage-inducible transcript 3                           | 1649      | A_23_P21134   | 1.22 ± 0.61  | 3.36 |
| <b>CEP19</b>        | centrosomal protein 19kDa                                   | 84984     | A_32_P212058  | 1.22 ± 0.55  | 3.92 |
| <b>DGKD</b>         | diacylglycerol kinase, delta 130kDa                         | 8527      | A_23_P210253  | 1.22 ± 0.54  | 3.94 |
| <b>FNDC3A</b>       | fibronectin type III domain containing 3A                   | 22862     | A_23_P25503   | 1.22 ± 0.53  | 4.05 |
| <b>RFESD</b>        | Rieske (Fe-S) domain containing                             | 317671    | A_23_P251647  | 1.21 ± 0.85  | 2.13 |
| <b>LOC101928424</b> | uncharacterized LOC101928424                                | 101928424 | A_32_P110016  | 1.21 ± 0.69  | 2.83 |
| <b>C10orf35</b>     | chromosome 10 open reading frame 35                         | 219738    | A_23_P369328  | 1.21 ± 0.59  | 3.48 |
| <b>RBM12</b>        | RNA binding motif protein 12                                | 10137     | A_23_P502832  | -1.21 ± 0.45 | 4.88 |
| <b>LINC01003</b>    | lincRNA 1003                                                |           | A_32_P6172    | -1.21 ± 0.38 | 5.90 |
| <b>SPRYD4</b>       | SPRY domain containing 4                                    | 283377    | A_23_P411612  | -1.21 ± 0.37 | 6.11 |
| <b>SNORD12C</b>     | small nucleolar RNA, C/D box 12C                            |           | A_21_P0000238 | -1.20 ± 0.76 | 2.46 |
| <b>MTM1</b>         | myotubularin 1                                              | 4534      | A_23_P62133   | 1.20 ± 0.75  | 2.52 |
| <b>IP6K3</b>        | inositol hexakisphosphate kinase 3                          | 117283    | A_23_P168130  | -1.20 ± 0.72 | 2.64 |
| <b>BEST1</b>        | bestrophin 1                                                | 7439      | A_23_P104996  | 1.20 ± 0.59  | 3.45 |
| <b>LOC100270746</b> | uncharacterized LOC100270746                                |           | A_32_P232035  | -1.20 ± 0.56 | 3.69 |
| <b>INSIG1</b>       | insulin induced gene 1                                      | 3638      | A_33_P3219090 | -1.20 ± 0.48 | 4.55 |
| <b>AREG</b>         | amphiregulin                                                | 374       | A_23_P259071  | 1.19 ± 1.31  | 1.14 |
| <b>STOX2</b>        | storkhead box 2                                             | 56977     | A_24_P163237  | 1.19 ± 0.89  | 1.95 |
| <b>SCARNA20</b>     | small Cajal body-specific RNA 20                            | 677681    | A_21_P0000350 | -1.19 ± 0.79 | 2.30 |
| <b>VWCE</b>         | von Willebrand factor C and EGF domains                     | 220001    | A_23_P52986   | -1.19 ± 0.64 | 3.07 |
| <b>IRAK2</b>        | interleukin-1 receptor-associated kinase 2                  | 3656      | A_33_P3352970 | 1.19 ± 0.59  | 3.39 |
| <b>CDNF</b>         | cerebral dopamine neurotrophic factor                       | 441549    | A_24_P93309   | 1.19 ± 0.56  | 3.65 |
| <b>LOC100129361</b> | chromosome X open reading frame 69-like                     | 100129361 | A_21_P0000666 | -1.19 ± 0.53 | 3.89 |
| <b>HIST1H4J</b>     | histone cluster 1, H4j                                      | 8363      | A_23_P30805   | 1.19 ± 0.52  | 3.99 |
| <b>EFCAB3</b>       | EF-hand calcium binding domain 3                            | 146779    | A_33_P3264042 | 1.19 ± 0.49  | 4.35 |
| <b>PDE7B</b>        | phosphodiesterase 7B                                        | 27115     | A_33_P3301940 | 1.19 ± 0.45  | 4.74 |
| <b>C12orf73</b>     | chromosome 12 open reading frame 73                         | 728568    | A_24_P769672  | 1.19 ± 0.33  | 6.82 |

|                     |                                                                               |           |                |              |      |
|---------------------|-------------------------------------------------------------------------------|-----------|----------------|--------------|------|
| <b>STC1</b>         | stanniocalcin 1                                                               | 6781      | A_23_P314755   | 1.18 ± 1.12  | 1.39 |
| <b>LOC729950</b>    | uncharacterized LOC729950                                                     | 729950    | A_22_P00023603 | -1.18 ± 1.04 | 1.55 |
| <b>LETM2</b>        | leucine zipper-EF-hand containing transmembrane protein 2                     | 137994    | A_23_P348264   | 1.18 ± 0.64  | 3.04 |
| <b>ZNRF3</b>        | zinc and ring finger 3                                                        | 84133     | A_24_P162373   | 1.18 ± 0.58  | 3.40 |
| <b>VDR</b>          | vitamin D (1,25- dihydroxyvitamin D3) receptor                                | 7421      | A_23_P162589   | -1.18 ± 0.51 | 4.09 |
| <b>KIAA1958</b>     | KIAA1958                                                                      | 158405    | A_33_P3404744  | 1.18 ± 0.50  | 4.24 |
| <b>MCOLN1</b>       | mucolipin 1                                                                   | 57192     | A_23_P27571    | -1.18 ± 0.50 | 4.15 |
| <b>USP35</b>        | ubiquitin specific peptidase 35                                               | 57558     | A_23_P116602   | -1.18 ± 0.44 | 4.92 |
| <b>CEBPA</b>        | CCAAT/enhancer binding protein (C/EBP), alpha                                 | 1050      | A_24_P224727   | 1.18 ± 0.41  | 5.28 |
| <b>GTF2IRD2</b>     | GTF2I repeat domain containing 2                                              | 84163     | A_23_P59616    | -1.18 ± 0.39 | 5.74 |
| <b>CASP9</b>        | caspase 9, apoptosis-related cysteine peptidase                               | 842       | A_23_P97309    | 1.18 ± 0.39  | 5.67 |
| <b>CYP3A5</b>       | cytochrome P450, family 3, subfamily A, polypeptide 5                         | 1577      | A_23_P8801     | 1.17 ± 1.34  | 1.06 |
| <b>IL11</b>         | interleukin 11                                                                | 3589      | A_33_P3243887  | -1.17 ± 0.72 | 2.52 |
| <b>FAR2</b>         | fatty acyl CoA reductase 2                                                    | 55711     | A_23_P150903   | 1.17 ± 0.71  | 2.60 |
| <b>PRKAR2A-AS1</b>  | PRKAR2A antisense RNA 1                                                       | 100506637 | A_21_P0002702  | 1.17 ± 0.70  | 2.69 |
| <b>JUN</b>          | jun proto-oncogene                                                            | 3725      | A_33_P3323298  | -1.17 ± 0.64 | 3.00 |
| <b>AVPI1</b>        | arginine vasopressin-induced 1                                                | 60370     | A_23_P1492     | 1.17 ± 0.55  | 3.69 |
| <b>PDE5A</b>        | phosphodiesterase 5A, cGMP-specific                                           | 8654      | A_33_P3378514  | -1.17 ± 0.50 | 4.17 |
| <b>AP5S1</b>        | adaptor-related protein complex 5, sigma 1 subunit                            | 55317     | A_23_P57137    | -1.17 ± 0.34 | 6.59 |
| <b>LOC100506844</b> | uncharacterized LOC100506844                                                  |           | A_33_P6822486  | 1.17 ± 0.33  | 6.75 |
| <b>SLC1A3</b>       | solute carrier family 1 (glial high affinity glutamate transporter), member 3 | 6507      | A_24_P286114   | 1.16 ± 1.00  | 1.60 |
| <b>CLDN4</b>        | claudin 4                                                                     | 1364      | A_33_P3285545  | -1.16 ± 0.88 | 1.91 |
| <b>FAM167A</b>      | family with sequence similarity 167, member A                                 | 83648     | A_23_P334955   | 1.16 ± 0.78  | 2.26 |
| <b>BHLHE40</b>      | basic helix-loop-helix family, member e40                                     | 8553      | A_24_P268676   | -1.16 ± 0.61 | 3.21 |
| <b>ITIH4</b>        | inter-alpha-trypsin inhibitor heavy chain family, member 4                    | 3700      | A_23_P109881   | 1.16 ± 0.59  | 3.33 |
| <b>HIST1H4F</b>     | histone cluster 1, H4f                                                        | 8361      | A_23_P359540   | 1.16 ± 0.58  | 3.41 |
| <b>MDN1</b>         | MDN1, midasin homolog (yeast)                                                 | 23195     | A_23_P365060   | 1.16 ± 0.56  | 3.53 |
| <b>ZSCAN12</b>      | zinc finger and SCAN domain containing 12                                     |           | A_21_P0000037  | -1.16 ± 0.55 | 3.57 |
| <b>PICK1</b>        | protein interacting with PRKCA 1                                              | 9463      | A_33_P3398697  | -1.16 ± 0.47 | 4.45 |

|                     |                                                                        |        |                |              |      |
|---------------------|------------------------------------------------------------------------|--------|----------------|--------------|------|
| <b>TUBGCP4</b>      | tubulin, gamma complex associated protein 4                            | 27229  | A_23_P3450     | 1.16 ± 0.42  | 5.12 |
| <b>SRSF6</b>        | serine/arginine-rich splicing factor 6                                 | 6431   | A_33_P3220530  | -1.16 ± 0.36 | 5.96 |
| <b>TXLNG</b>        | taxilin gamma                                                          | 55787  | A_23_P146997   | 1.16 ± 0.36  | 5.96 |
| <b>DNAJB5</b>       | DnaJ (Hsp40) homolog, subfamily B, member 5                            | 25822  | A_23_P112241   | -1.16 ± 0.35 | 6.33 |
| <b>ZNF844</b>       | zinc finger protein 844                                                | 284391 | A_33_P3247838  | 1.16 ± 0.33  | 6.54 |
| <b>PPP4R2</b>       | protein phosphatase 4, regulatory subunit 2                            | 151987 | A_32_P228775   | 1.16 ± 0.32  | 6.80 |
| <b>SLBP</b>         | stem-loop binding protein                                              | 7884   | A_23_P7101     | 1.16 ± 0.30  | 7.23 |
| <b>LOC100505501</b> | uncharacterized LOC100505501                                           |        | A_21_P0014222  | -1.15 ± 0.90 | 1.84 |
| <b>KIF23</b>        | kinesin family member 23                                               | 9493   | A_23_P48835    | -1.15 ± 0.89 | 1.86 |
| <b>CSRP2</b>        | cysteine and glycine-rich protein 2                                    | 1466   | A_23_P44724    | -1.15 ± 0.81 | 2.12 |
| <b>C5orf34</b>      | chromosome 5 open reading frame 34                                     | 375444 | A_23_P403081   | 1.15 ± 0.76  | 2.32 |
| <b>LINC01431</b>    | lincRNA 1431                                                           |        | A_22_P00019189 | 1.15 ± 0.71  | 2.53 |
| <b>CDK17</b>        | cyclin-dependent kinase 17                                             | 5128   | A_33_P3341224  | 1.15 ± 0.70  | 2.56 |
| <b>SRP14-AS1</b>    | SRP14 antisense RNA1 (head to head)                                    |        | A_19_P00320723 | 1.15 ± 0.59  | 3.25 |
| <b>PTPN4</b>        | protein tyrosine phosphatase, non-receptor type 4 (megakaryocyte)      | 5775   | A_33_P3265920  | 1.15 ± 0.53  | 3.74 |
| <b>BICD1</b>        | bicaudal D homolog 1 (Drosophila)                                      | 636    | A_33_P3256425  | 1.15 ± 0.50  | 4.08 |
| <b>PYGO1</b>        | pygopus family PHD finger 1                                            | 26108  | A_33_P3782469  | -1.15 ± 0.48 | 4.20 |
| <b>PPAT</b>         | phosphoribosyl pyrophosphate amidotransferase                          | 5471   | A_24_P123347   | 1.15 ± 0.46  | 4.45 |
| <b>SCHIP1</b>       | schwannomin interacting protein 1                                      | 29970  | A_32_P62863    | -1.15 ± 0.40 | 5.30 |
| <b>SLC39A14</b>     | solute carrier family 39 (zinc transporter), member 14                 | 23516  | A_23_P59950    | 1.15 ± 0.38  | 5.62 |
| <b>RASD1</b>        | RAS, dexamethasone-induced 1                                           | 51655  | A_23_P118392   | -1.14 ± 0.91 | 1.79 |
| <b>LINC00629</b>    | lincRNA 629                                                            |        | A_21_P0006516  | 1.14 ± 0.89  | 1.83 |
| <b>TMEM44-AS1</b>   | TMEM44 antisense RNA 1                                                 |        | A_22_P00006209 | 1.14 ± 0.60  | 3.16 |
| <b>MYCBPAP</b>      | MYCBP associated protein                                               | 84073  | A_33_P3361388  | 1.14 ± 0.43  | 4.75 |
| <b>SLC3A2</b>       | solute carrier family 3 (amino acid transporter heavy chain), member 2 | 6520   | A_23_P75811    | 1.14 ± 0.42  | 5.02 |
| <b>LOC101927789</b> | putative ubiquitin-like protein FUBI-like protein ENSP00000310146      |        | A_21_P0010979  | -1.14 ± 0.42 | 4.94 |
| <b>NUBP1</b>        | nucleotide binding protein 1                                           | 4682   | A_33_P3413053  | -1.14 ± 0.29 | 7.50 |
| <b>SIAH2</b>        | siah E3 ubiquitin protein ligase 2                                     | 6478   | A_33_P3358342  | 1.14 ± 0.28  | 7.82 |
| <b>KLHL41</b>       | kelch-like family member 41                                            | 10324  | A_23_P17190    | -1.13 ± 1.10 | 1.34 |
| <b>KIF18A</b>       | kinesin family member 18A                                              | 81930  | A_33_P3242649  | -1.13 ± 0.98 | 1.57 |

|                    |                                                                           |        |               |              |      |
|--------------------|---------------------------------------------------------------------------|--------|---------------|--------------|------|
| <b>CNIH3</b>       | cornichon family AMPA receptor auxiliary protein 3                        | 149111 | A_23_P384044  | -1.13 ± 0.86 | 1.91 |
| <b>ATOH8</b>       | atonal homolog 8 (Drosophila)                                             | 84913  | A_23_P142878  | -1.13 ± 0.63 | 2.89 |
| <b>CGRF1</b>       | cell growth regulator with ring finger domain 1                           | 10668  | A_23_P37283   | 1.13 ± 0.59  | 3.18 |
| <b>HIST2H4B</b>    | histone cluster 2, H4b                                                    | 554313 | A_23_P436281  | 1.13 ± 0.56  | 3.43 |
| <b>TNFSF8</b>      | tumor necrosis factor (ligand) superfamily, member 8                      | 944    | A_23_P169257  | -1.13 ± 0.54 | 3.56 |
| <b>ACAT2</b>       | acetyl-CoA acetyltransferase 2                                            | 39     | A_23_P31135   | -1.13 ± 0.49 | 4.12 |
| <b>ST3GAL4-AS1</b> | ST3GAL4 antisense RNA 1 (head to head)                                    |        | A_21_P0000607 | 1.13 ± 0.42  | 4.86 |
| <b>PELI1</b>       | pellino E3 ubiquitin protein ligase 1                                     | 57162  | A_33_P3316928 | 1.13 ± 0.35  | 6.08 |
| <b>RIPK2</b>       | receptor-interacting serine-threonine kinase 2                            | 8767   | A_23_P252106  | 1.13 ± 0.34  | 6.33 |
| <b>ABHD6</b>       | abhydrolase domain containing 6                                           | 57406  | A_23_P211850  | 1.13 ± 0.34  | 6.23 |
| <b>CREB5</b>       | cAMP responsive element binding protein 5                                 | 9586   | A_23_P157117  | 1.12 ± 1.20  | 1.18 |
| <b>FAM26F</b>      | family with sequence similarity 26, member F                              | 441168 | A_23_P7827    | 1.12 ± 0.99  | 1.55 |
| <b>GOLGA2P2Y</b>   | golgin A2 pseudogene 2, Y-linked                                          | 84559  | A_24_P314554  | -1.12 ± 0.83 | 1.99 |
| <b>EDN1</b>        | endothelin 1                                                              | 1906   | A_23_P214821  | -1.12 ± 0.79 | 2.11 |
| <b>PGM5P3-AS1</b>  | PGM5P3 antisense RNA 1                                                    | 572558 | A_32_P157208  | -1.12 ± 0.79 | 2.11 |
| <b>SLC25A40</b>    | solute carrier family 25, member 40                                       | 55972  | A_23_P432626  | 1.12 ± 0.78  | 2.16 |
| <b>JUNB</b>        | jun B proto-oncogene                                                      | 3726   | A_24_P241815  | -1.12 ± 0.68 | 2.61 |
| <b>ZNF138</b>      | zinc finger protein 138                                                   | 7697   | A_23_P59855   | 1.12 ± 0.64  | 2.87 |
| <b>IER3</b>        | immediate early response 3                                                | 8870   | A_23_P42257   | -1.12 ± 0.62 | 2.97 |
| <b>NEK7</b>        | NIMA-related kinase 7                                                     | 140609 | A_23_P353574  | 1.12 ± 0.55  | 3.46 |
| <b>OPA3</b>        | optic atrophy 3 (autosomal recessive, with chorea and spastic paraplegia) | 80207  | A_24_P475814  | -1.12 ± 0.36 | 5.87 |
| <b>CNNM4</b>       | cyclin and CBS domain divalent metal cation transport mediator 4          | 26504  | A_23_P119923  | 1.12 ± 0.36  | 5.76 |
| <b>FNBP4</b>       | formin binding protein 4                                                  | 23360  | A_23_P395595  | 1.12 ± 0.35  | 6.06 |
| <b>RBM4B</b>       | RNA binding motif protein 4B                                              | 83759  | A_23_P1638    | -1.12 ± 0.30 | 7.03 |
| <b>THBD</b>        | thrombomodulin                                                            | 7056   | A_23_P91390   | -1.11 ± 0.97 | 1.56 |
| <b>CRLF3</b>       | cytokine receptor-like factor 3                                           | 51379  | A_24_P56894   | 1.11 ± 0.92  | 1.68 |
| <b>BMP4</b>        | bone morphogenetic protein 4                                              | 652    | A_23_P54144   | -1.11 ± 0.87 | 1.81 |
| <b>CTAGE10P</b>    | CTAGE family, member 10, pseudogene                                       |        | A_33_P3340007 | 1.11 ± 0.81  | 2.02 |
| <b>VTRNA1-3</b>    | vault RNA 1-3                                                             | 56662  | A_21_P0000515 | -1.11 ± 0.76 | 2.21 |
| <b>ITGA2</b>       | integrin, alpha 2 (CD49B, alpha 2 subunit of VLA-2 receptor)              | 3673   | A_32_P178800  | 1.11 ± 0.64  | 2.76 |

|                     |                                                                      |           |                |              |      |
|---------------------|----------------------------------------------------------------------|-----------|----------------|--------------|------|
| <b>CUTC</b>         | cutC copper transporter                                              | 51076     | A_23_P98015    | 1.11 ± 0.62  | 2.93 |
| <b>SCML2</b>        | sex comb on midleg-like 2 (Drosophila)                               | 10389     | A_33_P3320010  | 1.11 ± 0.61  | 3.00 |
| <b>MESP2</b>        | mesoderm posterior basic helix-loop-helix transcription factor 2     | 145873    | A_33_P3214463  | 1.11 ± 0.56  | 3.37 |
| <b>AMOTL2</b>       | angiominin like 2                                                    | 51421     | A_23_P166686   | -1.11 ± 0.52 | 3.72 |
| <b>DLEU1</b>        | deleted in lymphocytic leukemia 1 (non-protein coding)               |           | A_23_P151337   | 1.11 ± 0.52  | 3.71 |
| <b>HOMER1</b>       | homer homolog 1 (Drosophila)                                         | 9456      | A_33_P3372257  | 1.11 ± 0.52  | 3.69 |
| <b>TMEM169</b>      | transmembrane protein 169                                            | 92691     | A_24_P929388   | 1.11 ± 0.49  | 3.96 |
| <b>PNMA5</b>        | paraneoplastic Ma antigen family member 5                            | 114824    | A_23_P352950   | -1.11 ± 0.46 | 4.32 |
| <b>FLJ37035</b>     | uncharacterized LOC399821                                            | 399821    | A_22_P00002248 | 1.11 ± 0.43  | 4.65 |
| <b>ZNF846</b>       | zinc finger protein 846                                              | 162993    | A_21_P0011721  | -1.11 ± 0.36 | 5.85 |
| <b>TUBB2A</b>       | tubulin, beta 2A class IIa                                           | 7280      | A_23_P19291    | -1.11 ± 0.30 | 7.07 |
| <b>PTGIR</b>        | prostaglandin I2 (prostacyclin) receptor (IP)                        | 5739      | A_23_P340848   | -1.10 ± 1.04 | 1.40 |
| <b>LOC101926967</b> | uncharacterized LOC101926967                                         |           | A_22_P00016533 | 1.10 ± 0.77  | 2.14 |
| <b>RGS17</b>        | regulator of G-protein signaling 17                                  | 26575     | A_23_P156861   | 1.10 ± 0.67  | 2.57 |
| <b>HIP1R</b>        | huntingtin interacting protein 1 related                             | 9026      | A_23_P398294   | -1.10 ± 0.66 | 2.62 |
| <b>SCARNA11</b>     | small Cajal body-specific RNA 11                                     | 677780    | A_21_P0000356  | -1.10 ± 0.60 | 2.99 |
| <b>SCARNA13</b>     | small Cajal body-specific RNA 13                                     | 677768    | A_33_P3338360  | -1.10 ± 0.58 | 3.11 |
| <b>HIST1H4K</b>     | histone cluster 1, H4k                                               | 8362      | A_33_P3299865  | 1.10 ± 0.51  | 3.77 |
| <b>FAM127C</b>      | family with sequence similarity 127, member C                        | 441518    | A_33_P3296707  | -1.10 ± 0.49 | 3.92 |
| <b>RHPN2</b>        | rhophilin, Rho GTPase binding protein 2                              | 85415     | A_33_P3387621  | 1.10 ± 0.42  | 4.80 |
| <b>PEX12</b>        | peroxisomal biogenesis factor 12                                     | 5193      | A_24_P416411   | 1.10 ± 0.42  | 4.76 |
| <b>SLC25A30</b>     | solute carrier family 25, member 30                                  | 253512    | A_33_P3380417  | 1.10 ± 0.37  | 5.62 |
| <b>LHFPL2</b>       | lipoma HMGIC fusion partner-like 2                                   | 10184     | A_23_P255104   | 1.10 ± 0.34  | 6.16 |
| <b>ASPM</b>         | asp (abnormal spindle) homolog, microcephaly associated (Drosophila) | 259266    | A_23_P52017    | -1.09 ± 1.15 | 1.20 |
| <b>LOC284561</b>    | uncharacterized LOC284561                                            |           | A_33_P3672756  | 1.09 ± 0.99  | 1.48 |
| <b>LOC101926941</b> | uncharacterized LOC101926941                                         | 101926941 | A_21_P0012956  | 1.09 ± 0.96  | 1.54 |
| <b>RNA5-8S5</b>     | RNA, 5.8S ribosomal 5                                                | 100008587 | A_33_P3399064  | -1.09 ± 0.95 | 1.57 |
| <b>C6orf52</b>      | chromosome 6 open reading frame 52                                   | 347744    | A_23_P410224   | 1.09 ± 0.77  | 2.14 |
| <b>SAMD8</b>        | sterile alpha motif domain containing 8                              | 142891    | A_23_P63870    | 1.09 ± 0.69  | 2.44 |
| <b>TMEM97</b>       | transmembrane protein 97                                             | 27346     | A_24_P190168   | -1.09 ± 0.65 | 2.65 |



|                     |                                                                |           |                |              |      |
|---------------------|----------------------------------------------------------------|-----------|----------------|--------------|------|
| <b>C11orf70</b>     | chromosome 11 open reading frame 70                            | 85016     | A_24_P364057   | 1.09 ± 0.64  | 2.74 |
| <b>RHCE</b>         | Rh blood group, CcEe antigens                                  | 6006      | A_23_P62634    | 1.09 ± 0.64  | 2.72 |
| <b>GEMIN5</b>       | gem (nuclear organelle) associated protein 5                   | 25929     | A_23_P336513   | 1.09 ± 0.59  | 3.05 |
| <b>PRR19</b>        | proline rich 19                                                | 284338    | A_33_P3403107  | -1.09 ± 0.58 | 3.12 |
| <b>SNORA11D</b>     | small nucleolar RNA, H/ACA box 11D                             | 100124541 | A_21_P0000479  | -1.09 ± 0.53 | 3.54 |
| <b>TBC1D22B</b>     | TBC1 domain family, member 22B                                 | 55633     | A_23_P58983    | 1.09 ± 0.46  | 4.28 |
| <b>C17orf58</b>     | chromosome 17 open reading frame 58                            | 284018    | A_24_P49190    | 1.09 ± 0.46  | 4.16 |
| <b>TUBB8</b>        | tubulin, beta 8 class VIII                                     | 347688    | A_24_P813147   | -1.09 ± 0.40 | 4.98 |
| <b>RHBDD1</b>       | rhomboid domain containing 1                                   | 84236     | A_24_P134834   | 1.09 ± 0.31  | 6.62 |
| <b>CLEC2B</b>       | C-type lectin domain family 2, member B                        | 9976      | A_33_P3332970  | -1.08 ± 1.24 | 1.07 |
| <b>FRZB</b>         | frizzled-related protein                                       | 2487      | A_23_P363778   | -1.08 ± 1.11 | 1.25 |
| <b>LOC101928907</b> | uncharacterized LOC101928907                                   | 101928907 | A_21_P0008557  | 1.08 ± 1.09  | 1.27 |
| <b>ASAP1-IT1</b>    | ASAP1 intronic transcript 1 (non-protein coding)               |           | A_23_P146325   | -1.08 ± 0.92 | 1.62 |
| <b>SOX9-AS1</b>     | SOX9 antisense RNA 1                                           | 400618    | A_24_P497464   | 1.08 ± 0.86  | 1.79 |
| <b>TMEM217</b>      | transmembrane protein 217                                      | 221468    | A_23_P334870   | 1.08 ± 0.82  | 1.93 |
| <b>PRPS1L1</b>      | phosphoribosyl pyrophosphate synthetase 1-like 1               | 221823    | A_32_P192823   | -1.08 ± 0.80 | 1.96 |
| <b>CHAC1</b>        | ChaC glutathione-specific gamma-glutamylcyclotransferase 1     | 79094     | A_33_P3376971  | 1.08 ± 0.73  | 2.24 |
| <b>LOC102724528</b> | uncharacterized LOC102724528                                   |           | A_21_P0014060  | 1.08 ± 0.68  | 2.45 |
| <b>MGC16275</b>     | uncharacterized protein MGC16275                               | 85001     | A_22_P00024329 | 1.08 ± 0.65  | 2.62 |
| <b>MALT1</b>        | MALT1 paracaspase                                              | 10892     | A_24_P116909   | 1.08 ± 0.61  | 2.89 |
| <b>BNC1</b>         | basonuclin 1                                                   | 646       | A_23_P22134    | 1.08 ± 0.56  | 3.25 |
| <b>EPT1</b>         | ethanolaminephosphotransferase 1 (CDP-ethanolamine-specific)   | 85465     | A_24_P940803   | 1.08 ± 0.46  | 4.22 |
| <b>SQLE</b>         | squalene epoxidase                                             | 6713      | A_23_P146284   | -1.08 ± 0.42 | 4.60 |
| <b>DAB2</b>         | Dab, mitogen-responsive phosphoprotein, homolog 2 (Drosophila) | 1601      | A_33_P3338928  | -1.08 ± 0.40 | 5.02 |
| <b>N4BP2L2</b>      | NEDD4 binding protein 2-like 2                                 | 10443     | A_23_P53856    | -1.08 ± 0.40 | 4.88 |
| <b>LOC102723919</b> | uncharacterized LOC102723919                                   |           | A_22_P00023080 | 1.08 ± 0.38  | 5.19 |
| <b>ZNF425</b>       | zinc finger protein 425                                        | 155054    | A_24_P941166   | 1.08 ± 0.37  | 5.44 |
| <b>SPTBN4</b>       | spectrin, beta, non-erythrocytic 4                             | 57731     | A_24_P293114   | -1.07 ± 0.87 | 1.73 |
| <b>FAM46B</b>       | family with sequence similarity 46, member B                   | 115572    | A_23_P12199    | -1.07 ± 0.79 | 1.97 |
| <b>MAFB</b>         | v-maf avian musculoaponeurotic fibrosarcoma oncogene homolog B | 9935      | A_33_P3220837  | -1.07 ± 0.78 | 2.01 |

|                     |                                                                 |        |                |              |      |
|---------------------|-----------------------------------------------------------------|--------|----------------|--------------|------|
| <b>IDI1</b>         | isopentenyl-diphosphate delta isomerase 1                       | 3422   | A_24_P103886   | -1.07 ± 0.73 | 2.21 |
| <b>PTGER4</b>       | prostaglandin E receptor 4 (subtype EP4)                        | 5734   | A_23_P148047   | -1.07 ± 0.70 | 2.36 |
| <b>SLC16A13</b>     | solute carrier family 16, member 13                             | 201232 | A_23_P118741   | 1.07 ± 0.70  | 2.36 |
| <b>ARMC9</b>        | armadillo repeat containing 9                                   | 80210  | A_23_P209731   | -1.07 ± 0.65 | 2.60 |
| <b>NT5DC2</b>       | 5'-nucleotidase domain containing 2                             | 64943  | A_23_P44836    | -1.07 ± 0.58 | 3.06 |
| <b>SHROOM3</b>      | shroom family member 3                                          | 57619  | A_33_P3336700  | -1.07 ± 0.53 | 3.43 |
| <b>IPO9</b>         | importin 9                                                      | 55705  | A_33_P3360917  | -1.07 ± 0.53 | 3.41 |
| <b>PNPLA7</b>       | patatin-like phospholipase domain containing 7                  | 375775 | A_33_P3666884  | -1.07 ± 0.53 | 3.38 |
| <b>CYB5B</b>        | cytochrome b5 type B (outer mitochondrial membrane)             | 80777  | A_22_P00010686 | -1.07 ± 0.46 | 4.12 |
| <b>C3orf17</b>      | chromosome 3 open reading frame 17                              | 25871  | A_24_P921155   | -1.07 ± 0.34 | 5.97 |
| <b>ARMC5</b>        | armadillo repeat containing 5                                   | 79798  | A_33_P3221563  | -1.07 ± 0.32 | 6.24 |
| <b>XPO1</b>         | exportin 1                                                      | 7514   | A_23_P40078    | 1.07 ± 0.28  | 7.25 |
| <b>CARD6</b>        | caspase recruitment domain family, member 6                     | 84674  | A_23_P41854    | -1.07 ± 0.28 | 7.15 |
| <b>PSCA</b>         | prostate stem cell antigen                                      | 8000   | A_23_P71379    | 1.06 ± 1.45  | 0.83 |
| <b>CCL2</b>         | chemokine (C-C motif) ligand 2                                  | 6347   | A_23_P89431    | -1.06 ± 1.27 | 1.01 |
| <b>DLGAP5</b>       | discs, large (Drosophila) homolog-associated protein 5          | 9787   | A_23_P88331    | -1.06 ± 1.17 | 1.12 |
| <b>PTH1H</b>        | parathyroid hormone-like hormone                                | 5744   | A_23_P2271     | 1.06 ± 0.87  | 1.72 |
| <b>C1QTNF2</b>      | C1q and tumor necrosis factor related protein 2                 | 114898 | A_33_P3403153  | -1.06 ± 0.75 | 2.13 |
| <b>C1orf109</b>     | chromosome 1 open reading frame 109                             | 54955  | A_23_P45970    | 1.06 ± 0.67  | 2.45 |
| <b>DCT</b>          | dopachrome tautomerase                                          | 1638   | A_23_P76622    | 1.06 ± 0.66  | 2.50 |
| <b>MMD</b>          | monocyte to macrophage differentiation-associated               | 23531  | A_23_P164047   | 1.06 ± 0.62  | 2.74 |
| <b>C1QTNF9B-AS1</b> | C1QTNF9B antisense RNA 1                                        |        | A_33_P3531204  | -1.06 ± 0.55 | 3.22 |
| <b>TRMT10A</b>      | tRNA methyltransferase 10 homolog A (S. cerevisiae)             | 93587  | A_23_P398637   | 1.06 ± 0.50  | 3.64 |
| <b>HS6ST1</b>       | heparan sulfate 6-O-sulfotransferase 1                          | 9394   | A_24_P8220     | 1.06 ± 0.50  | 3.62 |
| <b>RIN2</b>         | Ras and Rab interactor 2                                        | 54453  | A_24_P305570   | -1.06 ± 0.39 | 4.94 |
| <b>DCAF10</b>       | DDB1 and CUL4 associated factor 10                              | 79269  | A_23_P217054   | 1.06 ± 0.38  | 5.08 |
| <b>LOC286437</b>    | uncharacterized LOC286437                                       |        | A_33_P3807593  | -1.06 ± 0.37 | 5.36 |
| <b>KCTD11</b>       | potassium channel tetramerization domain containing 11          | 147040 | A_23_P354027   | -1.06 ± 0.34 | 5.75 |
| <b>HERPUD1</b>      | homocysteine-inducible, endoplasmic reticulum stress-inducible, | 9709   | A_23_P54846    | 1.06 ± 0.32  | 6.25 |

ubiquitin-like domain member 1

|                     |                                                                                   |           |                |              |      |
|---------------------|-----------------------------------------------------------------------------------|-----------|----------------|--------------|------|
| <b>RC3H1</b>        | ring finger and CCCH-type domains 1                                               | 149041    | A_32_P96807    | -1.06 ± 0.30 | 6.63 |
| <b>SLC51B</b>       | solute carrier family 51, beta subunit                                            | 123264    | A_23_P436284   | -1.05 ± 1.38 | 0.89 |
| <b>LINC00312</b>    | lincRNA 312                                                                       |           | A_23_P166779   | -1.05 ± 0.93 | 1.53 |
| <b>PEX5L</b>        | peroxisomal biogenesis factor 5-like                                              | 51555     | A_23_P259003   | 1.05 ± 0.74  | 2.12 |
| <b>LOC101928236</b> | uncharacterized LOC101928236                                                      |           | A_22_P00009053 | 1.05 ± 0.73  | 2.14 |
| <b>PHLPP1</b>       | PH domain and leucine rich repeat protein phosphatase 1                           | 23239     | A_23_P89762    | 1.05 ± 0.71  | 2.27 |
| <b>DPY19L2P1</b>    | DPY19L2 pseudogene 1                                                              |           | A_33_P3626301  | 1.05 ± 0.71  | 2.23 |
| <b>GPATCH1</b>      | G patch domain containing 1                                                       | 55094     | A_23_P27822    | 1.05 ± 0.56  | 3.12 |
| <b>MYLIP</b>        | myosin regulatory light chain interacting protein                                 | 29116     | A_33_P3255914  | 1.05 ± 0.52  | 3.39 |
| <b>TBL1X</b>        | transducin (beta)-like 1X-linked                                                  | 6907      | A_33_P3347168  | 1.05 ± 0.47  | 3.86 |
| <b>MRM1</b>         | mitochondrial rRNA methyltransferase 1 homolog ( <i>S. cerevisiae</i> )           | 79922     | A_23_P15603    | 1.05 ± 0.44  | 4.23 |
| <b>CHST3</b>        | carbohydrate (chondroitin 6) sulfotransferase 3                                   | 9469      | A_24_P269779   | 1.05 ± 0.44  | 4.23 |
| <b>LOC100499489</b> | uncharacterized LOC100499489                                                      |           | A_21_P0000660  | -1.05 ± 0.40 | 4.82 |
| <b>IMPA2</b>        | inositol(myo)-1(or 4)-monophosphatase 2                                           | 3613      | A_23_P50081    | 1.05 ± 0.39  | 4.95 |
| <b>KSR1</b>         | kinase suppressor of ras 1                                                        | 8844      | A_23_P207774   | 1.05 ± 0.38  | 5.04 |
| <b>C12orf65</b>     | chromosome 12 open reading frame 65                                               | 91574     | A_32_P11894    | 1.05 ± 0.37  | 5.26 |
| <b>FAM199X</b>      | family with sequence similarity 199, X-linked                                     | 139231    | A_23_P45294    | 1.05 ± 0.32  | 6.21 |
| <b>FAM220A</b>      | family with sequence similarity 220, member A                                     | 84792     | A_23_P42738    | 1.05 ± 0.31  | 6.47 |
| <b>ZNF25</b>        | zinc finger protein 25                                                            | 219749    | A_24_P69691    | 1.05 ± 0.28  | 7.13 |
| <b>LOC101928716</b> | uncharacterized LOC101928716                                                      |           | A_22_P00022529 | -1.04 ± 1.05 | 1.27 |
| <b>CITED1</b>       | Cbp/p300-interacting transactivator, with Glu/Asp-rich carboxy-terminal domain, 1 | 4435      | A_23_P73526    | 1.04 ± 1.04  | 1.28 |
| <b>NAMA</b>         | non-protein coding RNA, associated with MAP kinase pathway and growth arrest      | 100996569 | A_21_P0013736  | -1.04 ± 0.93 | 1.50 |
| <b>ITIH1</b>        | inter-alpha-trypsin inhibitor heavy chain 1                                       | 3697      | A_23_P18223    | -1.04 ± 0.92 | 1.55 |
| <b>PDCD6</b>        | programmed cell death 6                                                           |           | A_21_P0003089  | 1.04 ± 0.84  | 1.75 |
| <b>ODF3L1</b>       | outer dense fiber of sperm tails 3-like 1                                         | 161753    | A_32_P468743   | 1.04 ± 0.84  | 1.75 |
| <b>OR51A2</b>       | olfactory receptor, family 51, subfamily A, member 2                              | 401667    | A_33_P3268060  | -1.04 ± 0.74 | 2.08 |
| <b>CLEC18B</b>      | C-type lectin domain family 18, member B                                          | 283971    | A_23_P206501   | 1.04 ± 0.69  | 2.29 |

|                     |                                                                                  |        |               |              |      |
|---------------------|----------------------------------------------------------------------------------|--------|---------------|--------------|------|
| <b>ZNF780A</b>      | zinc finger protein 780A                                                         | 284323 | A_33_P3255631 | 1.04 ± 0.66  | 2.48 |
| <b>ARIH2OS</b>      | ariadne homolog 2 opposite strand                                                | 646450 | A_24_P76018   | 1.04 ± 0.64  | 2.60 |
| <b>ABTB2</b>        | ankyrin repeat and BTB (POZ) domain containing 2                                 | 25841  | A_23_P356616  | 1.04 ± 0.53  | 3.30 |
| <b>AVL9</b>         | AVL9 homolog (S. cerevisiae)                                                     | 23080  | A_23_P122947  | 1.04 ± 0.45  | 4.13 |
| <b>CREB3L2</b>      | cAMP responsive element binding protein 3-like 2                                 | 64764  | A_33_P3211739 | 1.04 ± 0.40  | 4.75 |
| <b>SLC27A3</b>      | solute carrier family 27 (fatty acid transporter), member 3                      | 11000  | A_24_P179816  | -1.04 ± 0.40 | 4.64 |
| <b>CABIN1</b>       | calcineurin binding protein 1                                                    | 23523  | A_24_P336113  | -1.04 ± 0.37 | 5.21 |
| <b>MTURN</b>        | maturin, neural progenitor differentiation regulator homolog (Xenopus)           | 222166 | A_32_P100439  | -1.04 ± 0.35 | 5.49 |
| <b>UBE2O</b>        | ubiquitin-conjugating enzyme E2O                                                 | 63893  | A_24_P172993  | 1.04 ± 0.32  | 6.14 |
| <b>FMO3</b>         | flavin containing monooxygenase 3                                                | 2328   | A_23_P155596  | -1.03 ± 1.90 | 0.56 |
| <b>IL1RN</b>        | interleukin 1 receptor antagonist                                                | 3557   | A_33_P3246833 | 1.03 ± 1.54  | 0.75 |
| <b>LIF</b>          | leukemia inhibitory factor                                                       | 3976   | A_24_P122137  | -1.03 ± 1.18 | 1.07 |
| <b>ZNF700</b>       | zinc finger protein 700                                                          | 90592  | A_23_P27636   | 1.03 ± 0.78  | 1.89 |
| <b>TRIM21</b>       | tripartite motif containing 21                                                   | 6737   | A_23_P47691   | -1.03 ± 0.68 | 2.35 |
| <b>INTU</b>         | inturned planar cell polarity protein                                            | 27152  | A_32_P118372  | 1.03 ± 0.65  | 2.46 |
| <b>GLYATL1</b>      | glycine-N-acyltransferase-like 1                                                 | 92292  | A_23_P370666  | 1.03 ± 0.65  | 2.44 |
| <b>ZNF81</b>        | zinc finger protein 81                                                           | 347344 | A_33_P3372285 | 1.03 ± 0.54  | 3.15 |
| <b>CSTF2T</b>       | cleavage stimulation factor, 3' pre-RNA, subunit 2, 64kDa, tau variant           | 23283  | A_24_P941051  | -1.03 ± 0.44 | 4.11 |
| <b>MFSD6</b>        | major facilitator superfamily domain containing 6                                | 54842  | A_33_P3272209 | -1.03 ± 0.44 | 4.09 |
| <b>LOC100630918</b> | uncharacterized LOC100630918                                                     |        | A_21_P0000847 | -1.03 ± 0.43 | 4.19 |
| <b>NCOR1</b>        | nuclear receptor corepressor 1                                                   | 9611   | A_24_P204214  | 1.03 ± 0.42  | 4.38 |
| <b>ZFAT</b>         | zinc finger and AT hook domain containing                                        | 57623  | A_32_P109922  | -1.03 ± 0.41 | 4.55 |
| <b>KLF6</b>         | Kruppel-like factor 6                                                            | 1316   | A_23_P63798   | -1.03 ± 0.40 | 4.75 |
| <b>EEF2K</b>        | eukaryotic elongation factor 2 kinase                                            | 29904  | A_33_P3342410 | -1.03 ± 0.38 | 4.99 |
| <b>LMO4</b>         | LIM domain only 4                                                                | 8543   | A_23_P380181  | 1.03 ± 0.38  | 4.96 |
| <b>CRTC3</b>        | CREB regulated transcription coactivator 3                                       | 64784  | A_23_P77228   | 1.03 ± 0.31  | 6.24 |
| <b>DDX42</b>        | DEAD (Asp-Glu-Ala-Asp) box helicase 42                                           | 11325  | A_23_P152651  | -1.03 ± 0.31 | 6.20 |
| <b>DUSP26</b>       | dual specificity phosphatase 26 (putative)                                       | 78986  | A_23_P146134  | -1.02 ± 1.00 | 1.33 |
| <b>SLC7A8</b>       | solute carrier family 7 (amino acid transporter light chain, L system), member 8 | 23428  | A_23_P205489  | -1.02 ± 0.89 | 1.56 |

|                     |                                                                     |           |                |              |      |
|---------------------|---------------------------------------------------------------------|-----------|----------------|--------------|------|
| <b>FAM196B</b>      | family with sequence similarity 196, member B                       | 100131897 | A_33_P3375636  | 1.02 ± 0.88  | 1.60 |
| <b>AGPAT9</b>       | 1-acylglycerol-3-phosphate O-acyltransferase 9                      | 84803     | A_23_P69810    | 1.02 ± 0.80  | 1.83 |
| <b>LOC102723505</b> | uncharacterized LOC102723505                                        | 102723505 | A_22_P00014813 | 1.02 ± 0.74  | 2.04 |
| <b>PRPS1</b>        | phosphoribosyl pyrophosphate synthetase 1                           | 5631      | A_23_P95764    | -1.02 ± 0.68 | 2.30 |
| <b>IPMK</b>         | inositol polyphosphate multikinase                                  | 253430    | A_23_P380371   | 1.02 ± 0.65  | 2.42 |
| <b>TCP10L</b>       | t-complex 10-like                                                   | 140290    | A_23_P350555   | 1.02 ± 0.64  | 2.47 |
| <b>TIMM13</b>       | translocase of inner mitochondrial membrane 13 homolog (yeast)      | 26517     | A_33_P3413845  | -1.02 ± 0.57 | 2.89 |
| <b>C10orf32</b>     | chromosome 10 open reading frame 32                                 | 119032    | A_23_P305140   | -1.02 ± 0.52 | 3.34 |
| <b>JMJD1C</b>       | jumonji domain containing 1C                                        | 221037    | A_23_P427217   | 1.02 ± 0.44  | 4.06 |
| <b>NIPA1</b>        | non imprinted in Prader-Willi/Angelman syndrome 1                   | 123606    | A_33_P3250840  | 1.02 ± 0.41  | 4.49 |
| <b>MTMR12</b>       | myotubularin related protein 12                                     | 54545     | A_24_P354615   | 1.02 ± 0.39  | 4.80 |
| <b>GPAM</b>         | glycerol-3-phosphate acyltransferase, mitochondrial                 | 57678     | A_24_P227069   | 1.02 ± 0.32  | 6.07 |
| <b>XBP1</b>         | X-box binding protein 1                                             | 7494      | A_23_P120845   | 1.02 ± 0.29  | 6.80 |
| <b>TENM2</b>        | teneurin transmembrane protein 2                                    | 57451     | A_24_P299474   | 1.01 ± 1.33  | 0.88 |
| <b>FAM225B</b>      | family with sequence similarity 225, member B (non-protein coding)  | 100128385 | A_32_P99347    | 1.01 ± 1.15  | 1.08 |
| <b>PPL</b>          | periplakin                                                          | 5493      | A_23_P106906   | -1.01 ± 0.83 | 1.70 |
| <b>PCSK9</b>        | proprotein convertase subtilisin/kexin type 9                       | 255738    | A_32_P142440   | -1.01 ± 0.78 | 1.86 |
| <b>FAR2P1</b>       | fatty acyl CoA reductase 2 pseudogene 1                             |           | A_24_P508103   | 1.01 ± 0.71  | 2.14 |
| <b>ATP6V1E2</b>     | ATPase, H <sup>+</sup> transporting, lysosomal 31kDa, V1 subunit E2 | 90423     | A_23_P143047   | 1.01 ± 0.67  | 2.30 |
| <b>B4GALT1</b>      | UDP-Gal:betaGlcNAc beta 1,4- galactosyltransferase, polypeptide 1   | 2683      | A_23_P135271   | 1.01 ± 0.53  | 3.15 |
| <b>DYRK1B</b>       | dual-specificity tyrosine-(Y)-phosphorylation regulated kinase 1B   | 9149      | A_23_P90296    | -1.01 ± 0.51 | 3.32 |
| <b>SNORD52</b>      | small nucleolar RNA, C/D box 52                                     | 26797     | A_21_P0000284  | -1.01 ± 0.50 | 3.45 |
| <b>CSDC2</b>        | cold shock domain containing C2, RNA binding                        | 27254     | A_24_P177279   | -1.01 ± 0.47 | 3.71 |
| <b>UAP1L1</b>       | UDP-N-acetylglucosamine pyrophosphorylase 1 like 1                  | 91373     | A_23_P135164   | -1.01 ± 0.46 | 3.79 |
| <b>BET1</b>         | Bet1 golgi vesicular membrane trafficking protein                   | 10282     | A_24_P269432   | 1.01 ± 0.44  | 4.01 |
| <b>SERTAD3</b>      | SERTA domain containing 3                                           | 29946     | A_23_P141960   | -1.01 ± 0.41 | 4.37 |
| <b>C14orf159</b>    | chromosome 14 open reading frame 159                                | 80017     | A_23_P48771    | -1.01 ± 0.38 | 4.86 |
| <b>ARHGEF17</b>     | Rho guanine nucleotide exchange factor (GEF) 17                     | 9828      | A_23_P76015    | -1.01 ± 0.37 | 4.99 |
| <b>BCDIN3D</b>      | BCDIN3 domain containing                                            | 144233    | A_23_P338233   | 1.01 ± 0.34  | 5.58 |
| <b>CCNT2</b>        | cyclin T2                                                           | 905       | A_24_P174341   | 1.00 ± 0.82  | 1.71 |

|                   |                                                                                |        |                |              |      |
|-------------------|--------------------------------------------------------------------------------|--------|----------------|--------------|------|
| <b>NUP50-AS1</b>  | NUP50 antisense RNA 1 (head to head)                                           |        | A_22_P00008681 | 1.00 ± 0.72  | 2.04 |
| <b>SLC7A1</b>     | solute carrier family 7 (cationic amino acid transporter, y+ system), member 1 | 6541   | A_24_P253251   | 1.00 ± 0.71  | 2.12 |
| <b>KLHDC9</b>     | kelch domain containing 9                                                      | 126823 | A_23_P86100    | 1.00 ± 0.70  | 2.13 |
| <b>LINC00938</b>  | lincRNA 938                                                                    |        | A_24_P661641   | -1.00 ± 0.68 | 2.23 |
| <b>DLX2</b>       | distal-less homeobox 2                                                         | 1746   | A_23_P28598    | 1.00 ± 0.56  | 2.91 |
| <b>PAXIP1-AS1</b> | PAXIP1 antisense RNA 1 (head to head)                                          | 202781 | A_21_P0005447  | 1.00 ± 0.55  | 2.95 |
| <b>XPOT</b>       | exportin, tRNA                                                                 | 11260  | A_23_P340722   | 1.00 ± 0.49  | 3.46 |
| <b>FUT10</b>      | fucosyltransferase 10 (alpha (1,3) fucosyltransferase)                         | 84750  | A_33_P3748714  | 1.00 ± 0.43  | 4.12 |
| <b>HSPA13</b>     | heat shock protein 70kDa family, member 13                                     | 6782   | A_24_P134392   | 1.00 ± 0.31  | 6.07 |

**Supplementary Table S8.** Common genes regulated by pirfenidone in fibroblasts *in vivo* and *in vitro*. Numbers represent mean log<sub>2</sub>(fold-change) ± the half width of the 95% confidence interval. Values in brackets are significances as -log<sub>10</sub>(P-value).

| GENE_SYMBOL    | GENE_NAME                                                 | ENTREZ_ID | SPOT_ID        | IPF+P(FB) - IPF(FB) | IPF(FB+P) – vehicle treated IPF(FB) | Regulation |
|----------------|-----------------------------------------------------------|-----------|----------------|---------------------|-------------------------------------|------------|
| <b>PDE4B</b>   | phosphodiesterase 4B, cAMP-specific                       | 5142      | A_23_P74278    | 1.20 ± 1.19 (1.32)  | 2.03 ± 0.60 (6.38)                  | both up    |
| <b>PTPN3</b>   | protein tyrosine phosphatase, non-receptor type 3         | 5774      | A_22_P00025093 | 1.56 ± 0.64 (4.46)  | 2.12 ± 0.87 (4.34)                  | both up    |
| <b>MYBL1</b>   | v-myb avian myeloblastosis viral oncogene homolog-like 1  | 4603      | A_23_P43157    | 1.21 ± 1.00 (1.70)  | 1.85 ± 0.80 (4.04)                  | both up    |
| <b>RIMBP3</b>  | RIMS binding protein 3                                    | 85376     | A_23_P154962   | 1.39 ± 0.57 (4.45)  | 1.77 ± 0.78 (3.95)                  | both up    |
| <b>BTBD11</b>  | BTB (POZ) domain containing 11                            | 121551    | A_23_P419714   | 1.22 ± 0.72 (2.73)  | 1.32 ± 0.74 (2.93)                  | both up    |
| <b>TGFR3</b>   | transforming growth factor, beta receptor III             | 7049      | A_23_P200780   | 1.26 ± 1.19 (1.41)  | 1.28 ± 0.95 (1.97)                  | both up    |
| <b>AREG</b>    | amphiregulin                                              | 374       | A_23_P259071   | 1.24 ± 1.17 (1.42)  | 1.19 ± 1.31 (1.14)                  | both up    |
| <b>LETM2</b>   | leucine zipper-EF-hand containing transmembrane protein 2 | 137994    | A_23_P348264   | 1.18 ± 0.59 (3.42)  | 1.18 ± 0.64 (3.04)                  | both up    |
| <b>FAR2</b>    | fatty acyl CoA reductase 2                                | 55711     | A_23_P150903   | 1.16 ± 0.87 (1.96)  | 1.17 ± 0.71 (2.60)                  | both up    |
| <b>C5orf34</b> | chromosome 5 open reading frame 34                        | 375444    | A_23_P403081   | 1.16 ± 0.85 (2.04)  | 1.15 ± 0.76 (2.32)                  | both up    |

|                  |                                                                |           |               |                     |                     |           |
|------------------|----------------------------------------------------------------|-----------|---------------|---------------------|---------------------|-----------|
| <b>CREB5</b>     | cAMP responsive element binding protein 5                      | 9586      | A_23_P157117  | 1.52 ± 0.83 (3.06)  | 1.12 ± 1.20 (1.18)  | both up   |
| <b>ITGA2</b>     | integrin, alpha 2 (CD49B, alpha 2 subunit of VLA-2 receptor)   | 3673      | A_32_P178800  | 1.14 ± 0.83 (2.05)  | 1.11 ± 0.64 (2.76)  | both up   |
| <b>RGS17</b>     | regulator of G-protein signaling 17                            | 26575     | A_23_P156861  | 1.30 ± 0.99 (1.92)  | 1.10 ± 0.67 (2.57)  | both up   |
| <b>PSCA</b>      | prostate stem cell antigen                                     | 8000      | A_23_P71379   | 1.16 ± 1.72 (0.75)  | 1.06 ± 1.45 (0.83)  | both up   |
| <b>AGPAT9</b>    | 1-acylglycerol-3-phosphate O-acyltransferase 9                 | 84803     | A_23_P69810   | 1.02 ± 0.84 (1.70)  | 1.02 ± 0.80 (1.83)  | both up   |
| <b>CCNT2</b>     | cyclin T2                                                      | 905       | A_24_P174341  | 1.05 ± 0.87 (1.71)  | 1.00 ± 0.82 (1.71)  | both up   |
| <b>KLHDC9</b>    | kelch domain containing 9                                      | 126823    | A_23_P86100   | 1.16 ± 0.95 (1.71)  | 1.00 ± 0.70 (2.13)  | both up   |
| <b>HTR2B</b>     | 5-hydroxytryptamine (serotonin) receptor 2B, G protein-coupled | 3357      | A_23_P16953   | -1.18 ± 1.37 (1.06) | -2.57 ± 1.02 (4.55) | both down |
| <b>MIR503HG</b>  | MIR503 host gene (non-protein coding)                          | 84848     | A_33_P3402329 | -1.58 ± 0.94 (2.71) | -2.49 ± 0.66 (7.22) | both down |
| <b>LINC00968</b> | lincRNA 968                                                    | 100507632 | A_21_P0000731 | -1.14 ± 0.91 (1.79) | -1.89 ± 1.23 (2.35) | both down |
| <b>EDN1</b>      | endothelin 1                                                   | 1906      | A_23_P214821  | -1.37 ± 1.09 (1.80) | -1.12 ± 0.79 (2.11) | both down |
| <b>LINC00312</b> | lincRNA 312                                                    |           | A_23_P166779  | -1.61 ± 0.90 (2.98) | -1.05 ± 0.93 (1.53) | both down |
